# Supplementary material for: Cooperative Interactions Between Bacillus and Lysobacter Enhance Consortium Stability and Fusarium Wilt Suppression in Cucumber
Source: Research Square preprint supplement (doi:10.21203/rs.3.rs-6904063/v1), 2025-06-20
Supplement: Supplementary file 1 [file 48b0065f5ab6d575d7eea4ea.pdf]

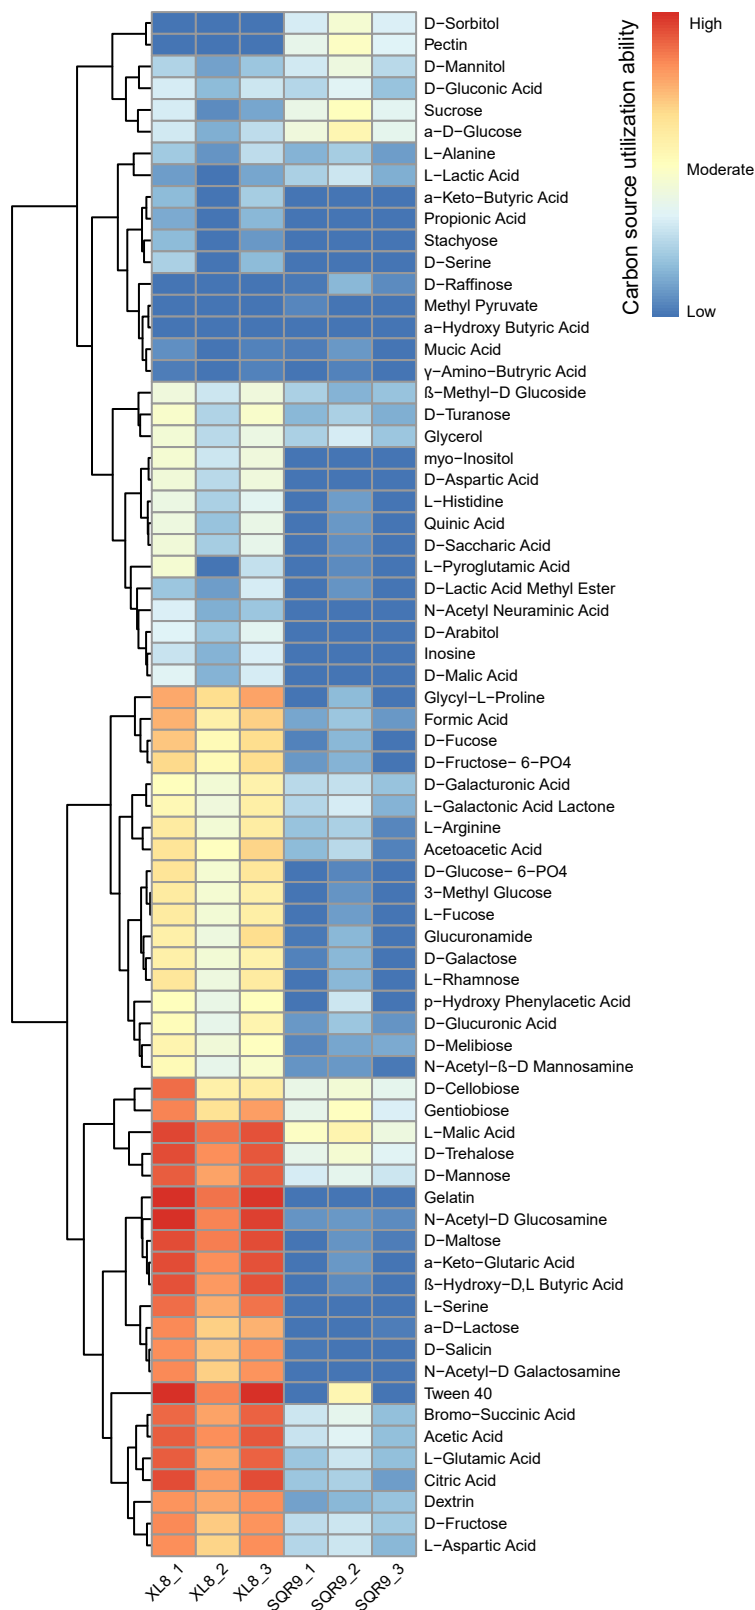

**Figure S4. Carbon source utilization of *B. velezensis* SQR9 and *L. enzymogenes* XL8 measured by BIOLOG assay.** Dye reduction signals by cells were automatically collected by the OmniLog instrument. The OmniLog values at 48 h in test wells, subtracting the values in the negative control well, are shown. The OmniLog value indicates the cell respiration intensity.
