# Supplementary material for: Cooperative Interactions Between Bacillus and Lysobacter Enhance Consortium Stability and Fusarium Wilt Suppression in Cucumber
Source: Research Square preprint supplement (doi:10.21203/rs.3.rs-6904063/v1), 2025-06-20
Supplement: Supplementary file 1 [file bf4804e450e3de41f37da470.xlsx]

## Sheet: Primers
Target strain	Target secondary metabolites	Primer name	Primer sequence (5'-3')
Lysobacter enzymogenes XL8	WAP-8294A2	WAP_F	GCAGTACGCCGACTACACC
		WAP_R	CGCTGCTTCCAGTAGTCGAT
	Heat-Stable Antifungal Factor	HSAF_F	CCACTGCACCCTGTTCGGCTA
		HSAF_R	TGATGACCACGTTCGGCACT
	Le-pyrrolopyrazines	Le_F	CCTGGACCGAGACACCCA
		Le_R	CGCGCTCAACTCGTCCATC
	Reference gene recA	LrecA_F	ATCCTCTACGGCGAAGGCATC
		LrecA_R	TCGCCGTCGCAGCTGTACCA
Bacillus velezensis SQR9	Reference gene recA	recA_F	AAAAAACAAAGTCGCTCCTCCG
		recA_R	CGATATCCAGTTCAGTTCCAAG
	Bacillomycin D	bmy_F	CTTGGCTATTTACAGCATCTCG
		bmy_R	ATCATCTTCTCCGATACTGACC
	Fengycin	fen_F	ATTGGACGGCAAACAAATCGAC
		fen_R	TATGCGGCTTCCTCTAGCAA
	Bacillaene	bae_F	CGCCAAATTTCAAGTGTGGA
		bae_R	TTCAGCGTAAATAAGCTTGCTC
	Surfactin	srf_F	TGGTTTTACGCTAATGTGCATC
		srf_R	GTCTGTTCCCCACTTGTCC
	Difficidin	dfn_F	AACAGTAAATAAAACGCACCAC
		dfn_R	GTTTCTTTATTTGCCCCGCTA
	Bacillibactin	dhb_F	TTTTCCTTCTGAGCGGATCACA
		dhb_R	GGCCGGATAATTCCATCGTT
	Macrolactin	mln_F	ACAAAAGCGAGGTTAATAGCAA
		mln_R	GCTTATTTCCGCACAAACGAGA
	Bacilysin	bac_F	GCAATTACAGCCTCTCATGCG
		bac_R	TTCATGAGCCCAGTAAATCGAA

## Sheet: Metabolome
ID	Name	Formula	Molecular Weight	RT [min]	m/z	mzCloud_Results	mzVault_Results	MassList_Results	Class_I	Class_II	Class_III	Class_IV	S1_XL8	S2_XL8	S3_XL8	S4_XL8	S5_XL8	S5_XL8	S1	S2	S3	S4	S5	S6	FC	log2FC	Pvalue	ROC	VIP
Com_10006_pos	RNK	C16 H32 N8 O5	208.121	0.558	209.129	Invalid mass	No results	No results					25418903.67984323	17657411.095344756	16242660.025578324	24734856.765640654	25222075.50648904	15876383.226052403	14653402.18038539	13932750.788442897	15671150.008959323	16747072.00811631	18904685.56697747	25620214.463885125	1.18594854630683	0.24604141831708098	0.22153940114815	0.694444444444444	0.664237200977875
Com_10007_pos	Thromboxane B2	C20 H34 O6	784.435	4.935	393.225	Invalid mass	No results	No results	Lipids and lipid-like molecules	Fatty Acyls	Eicosanoids	Thromboxanes	1343624.922565482	1341769.5703776788	1375407.810376043	1447318.8656000148	1260735.387937945	1300129.0098103136	25440162.921215534	15600574.892868748	19718792.83760028	15413772.199776096	14505364.39233069	26253840.37143668	0.0690054949750915	-3.85714	1.18523177199887e-06	1	1.50090064581144
Com_10049_pos	Indoxylsulfuric acid	C8 H7 N O4 S	213.009	2.274	214.016	No results	No results	Full match	Organic acids and derivatives	Organic sulfuric acids and derivatives	Arylsulfates	Arylsulfates	7213922.953026933	11760735.162701182	20477512.326328825	9873193.537120655	4145387.013127904	17784868.252582457	22033552.6978823	23649632.71371888	19906679.58278344	18531930.363870837	20965143.96707184	18400446.43919937	0.577027514217222	-0.793288	0.0368801145417701	0.916666666666667	1.02689411974334
Com_10077_pos	4-{3-[2-nitro-4-(trifluoromethyl)phenoxy]phenyl}morpholine	C17 H15 F3 N2 O4	330.143	1.447	369.106	Invalid mass	No results	No results					8396905.087199848	11525951.93241521	21815951.624966238	14850382.421206605	9901282.269520694	17914232.739223354	8807583.095884815	8901469.88299241	11100435.792286914	8529416.516831849	8096651.17996815	13949648.39699084	1.4213086620897	0.5072198951223525	0.103275059788094	0.777777777777778	0.809495602272303
Com_10113_pos	Cotinine N-oxide	C10 H12 N2 O2	210.101	1.454	211.108	Invalid mass	No results	No results	Organoheterocyclic compounds	Pyridines and derivatives	Pyrrolidinylpyridines	Pyrrolidinylpyridines	20642127.19987176	18831851.51179835	21618933.50385469	17528803.454208534	22070402.077854782	14674581.449012076	13539535.43085481	13055091.756225787	14092205.5034891	15303324.669788947	17607721.77395143	25776209.15471342	1.16093341013669	0.21528522317615778	0.200556638791562	0.75	0.632848353908937
Com_103_pos	Benzathine	C16 H20 N2	240.162	5.24	241.17	Full match	No results	No results					6317388.672423731	6368406.056564908	8290840.504729231	7325192.347184497	6347378.187215268	8520624.081042793	2574343139.997917	2247351656.351979	2140556995.948439	2446829911.1346965	3267475472.42136	1994544487.8257136	0.00294250771610642	-8.40874	7.24567396304392e-14	1	1.5087978163376
Com_1032_pos	N-Acetylornithine	C7 H14 N2 O3	174.101	1.45	175.108	Full match	Full match	Full match	Organic acids and derivatives	Carboxylic acids and derivatives	Amino acids, peptides, and analogues	N-acyl-alpha amino acids	238194638.97612795	135028608.455679	217082492.913878	211075864.01976103	182956628.8717973	346181003.45887744	243562723.1377176	106801971.95059904	158945834.6685994	93053380.42912114	95356446.07795466	139216156.86718398	1.58974930095753	0.668799274451787	0.0345150591853763	0.805555555555556	0.928525900491981
Com_10374_pos	GPK	C13 H24 N4 O4	300.18	1.894	301.187	Full match	No results	No results					27670414.41940669	5161848.470028194	3205319.668243665	5140505.225004511	8085629.066721124	2950420.7637835154	6392737.030887486	1318777.9586628673	1576837.7171251976	743753.3070988668	1354902.006329416	5312251.951674265	3.12673362181498	1.6446563158871457	0.0445015035920453	0.777777777777778	0.919546599573725
Com_1039_pos	Perillartine	C10 H15 N O	165.115	5.946	166.123	Full match	No results	No results	Lipids and lipid-like molecules	Prenol lipids	Monoterpenoids	Menthane monoterpenoids	4780280.457659262	4782634.828384301	250571550.15886983	60528008.20142996	16002196.790732965	155663043.6147861	165889169.83539373	253437851.7869932	256152595.0466536	339695087.7852573	379728221.7977586	76352375.56520765	0.334631055156606	-1.57936	0.0382935519911608	0.916666666666667	0.993812190812781
Com_10395_pos	3-hydroxy-2-octylpentanedioic acid	C13 H24 O5	242.152	6.047	260.186	Invalid mass	No results	No results					27219422.065009955	19534896.980858933	17144306.65500439	19466873.828771293	15988583.193586905	15427284.695534008	24742521.80973452	17460312.523582708	20293728.58627872	20360892.897966787	19029502.08361877	24531373.601597536	0.90794876070835	-0.139317	0.319616253352558	0.722222222222222	0.570334597553277
Com_104_pos	L-Tryptophan	C11 H12 N2 O2	204.09	5.146	205.097	Full match	Full match	Full match	Organoheterocyclic compounds	Indoles and derivatives	Indolyl carboxylic acids and derivatives	Indolyl carboxylic acids and derivatives	145161140.33609122	184915183.11267728	73759725.96329024	114946991.401687	138880979.63140887	3611233.063130508	2454192539.8170724	1971550283.5128	76587974.7332638	1826727677.4158688	1432275791.6293883	3459721963.9171104	0.0589316406489347	-4.08481	0.00620691260581831	0.888888888888889	1.13853497267725
Com_10443_pos	Scopolamine	C17 H21 N O4	303.147	6.455	304.154	Full match	No results	No results	Organic acids and derivatives	Hydroxy acids and derivatives	Beta hydroxy acids and derivatives	Beta hydroxy acids and derivatives	1544307.461429793	1583279.2297238056	1506986.2143919596	1368734.2359961672	1632429.5824441055	1369932.386182307	8502822.565078048	16656732.617050145	21674836.58150378	15177764.864362769	16253545.945248898	6381645.930791671	0.106390445410571	-3.23256	7.15161829578203e-05	1	1.45248043405926
Com_10448_pos	N1-{4-[amino(hydroxyimino)methyl]phenyl}acetamide	C9 H11 N3 O2	193.085	2.99	194.093	Full match	No results	No results					21144619.59011818	19993527.1206015	11823728.283697536	15641648.66141418	17222832.43357399	11131197.896237051	24702750.155072294	11713054.287847511	12302064.655517995	11260534.63944183	15203204.042251464	23525818.91654628	0.982272127137787	-0.0258053	0.968110179340682	0.5	0.379014918802555
Com_10450_pos	Diaminopimelic acid	C7 H14 N2 O4	190.096	1.441	191.103	Full match	Full match	No results	Organic acids and derivatives	Carboxylic acids and derivatives	Amino acids, peptides, and analogues	Alpha amino acids	7546591.375470213	6289770.280843557	8778316.022286758	8387133.221252574	5461429.296306248	12749394.10215383	24021274.843380623	14434521.576469673	15223105.339038784	14069583.765555829	11174562.742231045	24331890.89215809	0.476612883598825	-1.06911	0.00188088330973398	0.972222222222222	1.20438943884366
Com_10548_pos	N-Carbamoyl-L-aspartate	C5 H8 N2 O5	176.044	1.519	177.051	No results	Full match	Full match	Organic acids and derivatives	Carboxylic acids and derivatives	Amino acids, peptides, and analogues	Aspartic acid and derivatives	26882636.643738333	3221317.2672055806	4118746.831553963	3681173.3953192686	4398055.232638836	10148791.65967081	20799658.115222096	2829873.217360693	3940022.306507033	2217581.738302605	440055.9140268154	3712385.648900284	1.54541469748895	0.627994023716655	0.274180216495956	0.75	0.531166559702606
Com_1058_pos	p-Mentha-1,3,8-triene	C10 H14	134.11	6.148	135.117	No results	No results	Full match	Lipids and lipid-like molecules	Prenol lipids	Monoterpenoids	Aromatic monoterpenoids	404315493.4566191	59834623.24936365	303269444.85247886	322777296.1344671	457251045.6456355	317249090.6484317	296652915.24240285	255889375.61150983	60824623.59750335	241610549.89328903	58552623.7521031	389683831.5693942	1.43084490262704	0.5168672986630467	0.365059277216323	0.777777777777778	0.44705569098849
Com_10582_pos	trans-3-Indoleacrylic acid	C11 H9 N O2	187.064	0.52	188.071	Full match	No results	Full match	Organoheterocyclic compounds	Indoles and derivatives	Indoles	Indoles	6832342.656232054	4355509.195111108	3534104.0060395887	4056462.256445272	4471888.0319692325	3002475.5994930887	4858956.985360266	4047462.864121451	5489992.275893819	7187359.453357017	6699386.270619183	23712078.79936488	0.504907438399712	-0.985909	0.112295213240742	0.805555555555556	0.822717122802313
Com_1060_pos	RMK	C17 H35 N7 O4 S	415.232	4.954	416.24	Invalid mass	No results	No results					8388614.738139354	27395803.40891499	26386705.573993474	14578633.295117524	8521156.1248971	8370004.46541646	285048960.61530733	362216831.0687748	342185307.57291913	344633096.5798062	343973108.8815634	274661411.69981885	0.0479541250970552	-4.3822	2.38654429836046e-05	1	1.46808782160736
Com_10686_pos	Veratrole	C8 H10 O2	138.068	0.077	139.075	Full match	No results	No results	Benzenoids	Benzene and substituted derivatives	Methoxybenzenes	Dimethoxybenzenes	22033228.08696342	18566994.44491279	17199105.773952015	21966955.471804705	25379153.828155342	16697508.625914209	16330535.575126467	13855657.0665374	15468854.469838222	18088235.453789216	10794171.645287098	19456547.970188	1.29628426713204	0.3743821270273324	0.0364149563353924	0.861111111111111	0.949246583809311
Com_10688_pos	N1-(3,5-dichlorophenyl)-3-morpholinopropanamide	C13 H16 Cl2 N2 O2	302.062	2.578	303.069	Invalid mass	No results	No results					26228217.395189285	20835719.19934672	12300801.411578244	19369205.58016413	15624010.184038997	13313906.15083465	17449225.12376228	10351301.282541633	9522756.084057923	10982576.870401466	14294801.99845966	17992982.02084714	1.33598451944137	0.41790329085495925	0.108987996002344	0.777777777777778	0.777773707090343
Com_107_pos	Indole-3-acrylic acid	C11 H9 N O2	187.064	5.146	188.071	Full match	No results	Full match	Organoheterocyclic compounds	Indoles and derivatives	Indoles	Indoles	149597044.20251548	226235778.9084476	83904448.22503062	136533667.86230725	166646404.31958032	65696957.9792698	2464509490.21904	1958863848.7644844	1989443136.6638503	1843441326.9496455	1420329329.9006732	3437534209.6240325	0.0631848890124033	-3.98428	7.75177248187756e-07	1	1.4758517010264
Com_10713_pos	SM 8:0;2O/35:0	C48 H99 N2 O6 P	830.718	11.275	831.725	No results	Invalid mass	No results					4614512.647811745	4135608.015046856	19457147.18501546	4187298.691024867	4751806.327020971	3450307.266444871	4237906.512922518	3726326.81075685	3588337.854724964	4176210.102921986	4170423.7350949417	15515904.939077768	1.14630958885562	0.1969967316933905	0.811133643587561	0.611111111111111	0.124635557592289
Com_10744_pos	N-Acetylneuraminic acid	C11 H19 N O9	331.09	4.468	332.097	Invalid mass	No results	No results	Organic oxygen compounds	Organooxygen compounds	Carbohydrates and carbohydrate conjugates	N-acylneuraminic acids	25043954.44064567	22381107.793610647	18787545.76169867	4898731.488259591	6031221.264608433	10352439.460658068	17701158.82520628	5029080.784504219	9168980.870120116	17057034.977420382	20168248.65795896	21736138.969015323	0.962958187830298	-0.0544549	0.778502045521662	0.472222222222222	0.141955456811446
Com_10776_pos	Tyrosylalanine	C12 H16 N2 O4	252.111	3.338	253.119	Full match	No results	No results	Organic acids and derivatives	Carboxylic acids and derivatives	Amino acids, peptides, and analogues	Dipeptides	10178851.227693964	13751326.032391785	19245886.4152314	11874573.494507683	8337157.977054682	15598057.076115748	12001849.394743154	15798061.308706231	15552777.596899476	15235877.396037154	12951408.813325625	12299154.622359972	0.94211203098936	-0.0860295	0.519474663691498	0.611111111111111	0.530226169137609
Com_10791_pos	8(9)-EET Ethanolamide	C22 H37 N O3	385.258	2.568	193.636	Invalid mass	No results	No results	Organic nitrogen compounds	Organonitrogen compounds	Amines	N-acylethanolamines	258081.4554065136	235357.52851770568	338735.2576704414	273395.8570950932	250257.96234649364	295708.7194199707	13227772.492308946	20619894.473137584	19929109.743509203	21527119.777578097	18469321.03267312	9829427.303983925	0.0159410677524183	-5.97111	2.21404082881451e-08	1	1.50108475851674
Com_10821_pos	cis-Aconitic acid	C6 H6 O6	174.017	3.006	197.006	No results	No results	Full match	Organic acids and derivatives	Carboxylic acids and derivatives	Tricarboxylic acids and derivatives	Tricarboxylic acids and derivatives	12720491.486287644	14381846.902420592	12850910.616903272	11440146.123303032	17396305.488086347	19118911.18199708	8803427.792308548	13352694.954628676	14209449.071328912	13058255.255362766	14744009.809201246	9128449.79371352	1.19935969180729	0.26226439250119754	0.164145767530297	0.638888888888889	0.677827180538217
Com_1084_pos	5-acetyl-2,6-dimethyl-1,2,3,4-tetrahydropyridin-4-one	C9 H13 N O2	167.095	5.52	168.102	Full match	No results	Full match					311756639.4085275	250432369.0924414	251159254.54687604	218124350.9108424	200580436.33428487	326524280.11356616	270408454.97683096	188428896.46266356	226268849.77381396	199135475.98940223	207060998.91182527	257624083.41469824	1.15542027719168	0.20841771876867657	0.192464503408782	0.694444444444444	0.613498815719083
Com_1091_pos	Delta-Tridecalactone	C13 H24 O2	212.177	6.804	463.318	No results	No results	Full match	Organoheterocyclic compounds	Lactones	Delta valerolactones	Delta valerolactones	32758326.81450041	268165404.53431275	225816064.0495284	183485371.65137672	290180858.1964482	255728148.13136992	190983522.2609385	260015475.70693997	224633599.77734104	158356199.3160336	176044402.32506195	387278770.3937919	0.89896472695014	-0.153664	0.517714215917118	0.555555555555556	0.329621502269634
Com_10919_pos	2,6-Diaminopimelic acid	C7 H14 N2 O4	190.095	1.245	191.103	No results	Full match	No results	Organic acids and derivatives	Carboxylic acids and derivatives	Amino acids, peptides, and analogues	Alpha amino acids	14939291.025116503	9116138.40396585	4308810.801065696	10571313.733497247	8171108.045325811	18806357.20099881	8995884.890298476	9449871.06842972	8707056.510256922	6220170.765880149	5365397.546473544	4217643.483923978	1.53443016055077	0.6177029831651009	0.174548516945202	0.75	0.639923469854678
Com_10970_pos	L-Dopa	C9 H11 N O4	197.069	1.93	198.076	Full match	Full match	Full match	Organic acids and derivatives	Carboxylic acids and derivatives	Amino acids, peptides, and analogues	Tyrosine and derivatives	19935636.663119007	20371310.19963696	16409630.526140708	20891312.870992213	18834745.1592753	14792881.741589203	11526694.888396746	9386471.752563749	10305558.421417411	10512568.085615486	9987847.003467236	13641288.086218126	1.70187864675937	0.7671281686571121	4.58694736808784e-05	1	1.37026782882102
Com_11042_pos	J147	C18 H17 F3 N2 O2	350.125	4.879	723.239	No results	No results	Full match	Benzenoids	Benzene and substituted derivatives	Anilides	Anilides	20061838.21880672	8861660.375267584	8876597.2122737	20667701.512782447	16025469.317285389	7659897.605316598	5871034.747044291	2087127.628709873	5706012.594909695	4981502.964273323	4363882.338305429	8084006.863453639	2.64212735324202	1.4017000076379578	0.00424343036129448	0.972222222222222	1.1554948545032
Com_11124_pos	Lysopa 18:0	C21 H43 O7 P	438.274	5.101	220.144	No results	No results	Full match	Lipids and lipid-like molecules	Glycerophospholipids	Glycerophosphates	Monoalkylglycerophosphates	19489849.37665357	20741198.380694237	17078813.46067537	16999290.292922806	24731167.873630863	15250025.222907895	6053152.765048301	4123313.378230271	4054640.381355239	4094810.968903599	4118471.4306287887	6546380.981737389	3.94230111785376	1.9790379754283558	5.20532735707699e-07	1	1.45804644370577
Com_1116_pos	N-isopropyl-N'-(2-oxoazepan-3-yl)urea	C10 H19 N3 O2	235.132	5.223	236.139	Invalid mass	No results	No results					427140821.6949902	328522337.4333093	166476399.42604384	329640933.72265804	412222864.1378188	108408530.7209124	13341093.664649645	8827379.287171278	9051489.348833626	9763196.89448022	9418848.38273861	45767161.12815086	18.4301466986134	4.203995649335085	6.09064830036269e-06	1	1.41906218172898
Com_1117_pos	5-Methyl-dl-tryptophan	C12 H14 N2 O2	218.105	5.283	236.139	No results	No results	Full match	Organoheterocyclic compounds	Indoles and derivatives	Indolyl carboxylic acids and derivatives	Indolyl carboxylic acids and derivatives	427140821.6949902	90018734.4701494	61283335.63028577	329640933.72265804	137491372.59318227	108408530.7209124	9150472.486761808	5976533.1580224605	5898160.616104867	6604631.707745326	5741479.065325496	45767161.12815086	14.5818360285087	3.866100478643962	0.000105161355543752	1	1.34473173203244
Com_1119_pos	Norsufentanil	C16 H24 N2 O2	276.184	5.138	277.191	Full match	No results	No results	Benzenoids	Benzene and substituted derivatives	Anilides	Anilides	91860246.73670882	2673242.7393946974	268431652.38436225	154021320.76582828	121477962.30125202	318101914.46851385	75740861.68228364	95393717.34266724	105092393.76369113	68132298.75978862	88305681.01412319	67430002.91446121	1.91276942292617	0.9356629727691577	0.957663506989624	0.777777777777778	0.142713465021799
Com_11252_pos	2'-O-Methyladenosine	C11 H15 N5 O4	281.113	4.77	282.12	Full match	Full match	Full match	Nucleosides, nucleotides, and analogues	Purine nucleosides	Not available	Purine nucleosides	18597571.738171704	20455861.697407	11322655.0799177	18842844.52260665	20197501.47490177	13102546.216667283	3668329.265417448	1810328.6919071649	2126025.2564652143	1836990.704362616	1013959.902191998	2962747.6943855416	7.64018973652912	2.9336084666053535	9.75241252957758e-06	1	1.43758026646874
Com_1129_pos	(±)17(18)-EpETE methyl ester	C21 H32 O3	349.262	6.198	350.269	Invalid mass	No results	No results					406039157.07535	208030270.6288404	311071528.9420687	353870111.17089355	333775590.55915	302814178.64754313	365342867.5559261	306557109.21135694	279804622.01343185	303145890.1718619	282213321.06120807	355437085.7899584	1.01220603978118	0.017502987971779724	0.982711599275922	0.555555555555556	0.20817209312859
Com_11351_pos	2,6-Xylidine	C8 H11 N	121.089	0.665	122.097	Full match	No results	Full match	Benzenoids	Benzene and substituted derivatives	Xylenes	m-Xylenes	19599184.52054446	11454254.23904899	9892663.749117834	14612429.218833383	12999487.695804644	7485819.682210663	11703548.13065008	12189332.061456216	14688551.953205654	17883469.27646859	18944117.616330504	20765101.697716907	0.790689205409405	-0.338817	0.157262699591671	0.75	0.745276390900992
Com_1136_pos	Urocanic acid	C6 H6 N2 O2	138.043	1.806	139.05	Full match	Full match	Full match	Organoheterocyclic compounds	Azoles	Imidazoles	Imidazolyl carboxylic acids and derivatives	345345987.3276758	274239801.0226073	308481235.0633489	351862808.02166736	228426383.30125672	310483043.3093185	125713298.08567998	92008744.16341697	106230631.79688412	109951750.23043022	88744628.83658163	116850847.2596584	2.84415878248925	1.5080020093720117	3.4440163830952e-07	1	1.46246004420836
Com_11371_pos	Lysopc 16:2 (2N Isomer)	C24 H46 N O7 P	491.299	5.056	492.306	No results	No results	Full match					2253081.501215996	3159876.952631032	12766641.295768317	6191898.191011067	3209893.0780966496	17360184.04710423	1486499.438754627	3936270.8240800807	3664382.6869404777	3675307.632784883	3398257.961946728	1782933.8825651817	2.5045946051665	1.324577107034742	0.106709507297117	0.666666666666667	0.871555421935504
Com_11533_pos	Asaraldehyde	C10 H12 O4	196.074	5.01	197.081	No results	No results	Full match	Benzenoids	Benzene and substituted derivatives	Benzoyl derivatives	Benzoyl derivatives	22710662.914561503	12538449.168914055	8567245.762699299	14318428.208557475	20404383.24304212	9699266.688459102	2879727.619358076	3371609.147536946	3126759.163898587	3296798.8405283606	3214172.978540373	3499631.4587919773	4.55102402882435	2.1861912035713655	0.000210361670985256	1	1.42292559889322
Com_11584_pos	D-Homocysteine	C4 H9 N O2 S	135.036	1.477	136.043	No results	No results	Full match	Organic acids and derivatives	Carboxylic acids and derivatives	Amino acids, peptides, and analogues	D-alpha-amino acids	11922972.64519077	14925894.992611991	11861886.731517335	18426512.09502125	7747549.368930057	7789898.503294298	15013659.013850449	11154982.712228542	14235021.808701416	16178974.69586466	12825960.839941474	20041963.50917363	0.81245676092606	-0.299637	0.179986531617414	0.722222222222222	0.652368793986947
Com_1160_pos	N-Acetyl-DL-glutamic acid	C7 H11 N O5	189.064	2.291	190.071	Full match	Full match	Full match	Organic acids and derivatives	Carboxylic acids and derivatives	Amino acids, peptides, and analogues	Glutamic acid and derivatives	86414883.77901405	134663323.9426584	252233803.00422692	135382972.42617646	61287615.23198135	304597833.1260328	206733387.07950947	190551826.6210267	196226869.61387777	183574608.91614604	212922422.71464783	194857987.91323456	0.822522989421307	-0.281872	0.225839216764754	0.666666666666667	0.690962429910163
Com_11634_pos	3-[4-methyl-1-(2-methylpropanoyl)-3-oxocyclohexyl]butanoic acid	C15 H24 O4	250.155	7.252	251.162	Invalid mass	No results	No results					12826834.468313152	3922627.099282519	15142588.687105378	10659188.871814571	15292405.811544033	16696612.776305009	1893236.9273629533	6314704.751643391	7793536.530862103	453497.29928323935	4644335.718964634	10578452.091473969	2.35307830803405	1.2345493327732284	0.0647013644687941	0.888888888888889	0.858727806873266
Com_1166_pos	3-hydroxyquinuclidine-3-carbonitrile hydrochloride	C8 H12 N2 O	170.106	5.258	171.113	Invalid mass	No results	No results					344248356.7562667	260801968.7078421	94576938.1711774	225299168.4020204	269841006.3329486	133265147.94921488	294362773.0012644	192986028.7163013	183347570.4027415	173420895.5346672	160750118.92110467	361351297.4096694	0.972049791066483	-0.0408979	0.77636873555881	0.472222222222222	0.495799838382306
Com_11694_pos	Norverapamil	C26 H36 N2 O4	440.264	2.17	221.139	Invalid mass	No results	No results	Benzenoids	Benzene and substituted derivatives	Phenylbutylamines	Phenylbutylamines	339495.97333979653	323023.6325060925	461277.8480635574	356375.3237636278	315638.72595644696	431608.511055187	13612838.828682477	16093445.126278909	17492705.862946443	14941162.898961129	17781780.2679752	8875994.269275667	0.0250841442313212	-5.31708	1.04872071704547e-09	1	1.50079734709686
Com_11731_pos	ethyl N-[2-cyano-3-(4-methoxyanilino)acryloyl]carbamate	C14 H15 N3 O4	289.11	3.099	290.117	Invalid mass	No results	No results					422160.8536120464	569410.7784320227	1222894.90873425	531394.3563495389	416428.2087337987	1081442.4724363058	9183052.454562703	9534325.799440144	17365768.25866109	3189769.761757815	746369.7906471372	14584156.222821971	0.0777191217345482	-3.68559	0.00408223442551422	0.944444444444444	1.21821086205342
Com_1175_pos	1-adamantyl(piperidino)methanone	C16 H25 N O	285.148	5.363	286.155	Invalid mass	No results	No results					401911360.6345872	292912035.92316794	186552934.87113085	278941887.7824974	313804201.8472196	185140970.55017927	115638386.9198968	99315626.97018608	99995539.2150503	111487857.71326472	94193272.60138766	131873407.62115902	2.54291645736925	1.3464840658349804	0.000355819092969369	1	1.36737438489865
Com_11778_pos	D-(-)-Salicin	C13 H18 O7	303.132	1.451	304.139	Invalid mass	No results	No results					2555078.9443529104	5314019.582160503	7623337.533458509	4048093.239526517	3562546.470927068	16213459.600178596	4618841.960006959	5762645.317615137	4917906.653245667	1682786.0015757482	4994761.238630097	2959944.115278526	1.57664178661967	0.6568549167101331	0.334255388083065	0.388888888888889	0.585225789917722
Com_11791_pos	octadec-9-ynoic acid	C18 H32 O2	297.267	6.319	280.263	Invalid mass	No results	No results					21703657.37919749	10876637.953477036	9757824.528637676	5301622.748061446	9725079.736784212	9748402.91725934	13449932.942304716	7738388.70395664	9903380.786317514	5766467.379767697	12471726.018642625	11689625.057942012	1.09986483482192	0.13732623819195375	0.835673166435985	0.583333333333333	0.186030626040441
Com_11850_pos	12-oxo Phytodienoic Acid	C18 H28 O3	292.204	11.385	293.211	Full match	No results	No results	Lipids and lipid-like molecules	Fatty Acyls	Eicosanoids	Prostaglandins and related compounds	3645299.538351484	3412228.402045219	2807931.466316909	3342939.913679256	3935967.49591346	2905330.0257421057	3740512.281862304	3183861.2373078903	17013937.625408676	3478981.09397983	3506219.0859102714	3449520.9576829844	0.583297297645141	-0.777697	0.302521094231838	0.694444444444444	0.518057178679317
Com_11876_pos	Deoxycytidine	C9 H13 N3 O4	227.09	2.178	455.188	No results	No results	Full match	Nucleosides, nucleotides, and analogues	Pyrimidine nucleotides	Pyrimidine deoxyribonucleotides	Pyrimidine 2'-deoxyribonucleoside monophosphates	12519846.693426048	15004220.76293027	12939957.695216682	17240324.3241854	7303779.085797976	15974696.290027833	11232103.634507457	9370127.35147001	8800991.897935295	9389920.946239917	7701980.04063496	13155179.246317154	1.35762637605713	0.44108649904239866	0.0881283505976573	0.777777777777778	0.795715896462766
Com_1188_pos	Thr-Leu	C10 H20 N2 O4	232.142	5.44	215.139	No results	No results	Full match	Organic acids and derivatives	Carboxylic acids and derivatives	Amino acids, peptides, and analogues	Dipeptides	398494672.19110256	148100466.9468028	63755177.00032001	111534077.2112447	199890438.3561305	70753880.41837838	140871088.22549006	86286168.7758937	71580870.97065881	73772333.7986461	89272976.30397338	195523715.4210716	1.50999225680939	0.5945411514766217	0.416248261372207	0.583333333333333	0.565377191342428
Com_11885_pos	1-(2-methoxy-4-nitrophenyl)pyrrolidine	C11 H14 N2 O3	222.101	3.985	223.108	Full match	No results	Full match					9521641.03296765	8406181.917974297	9519723.9079712	8549357.317995092	8529802.766433446	15958436.299530078	17428622.382037506	9765451.997616634	9286982.71304065	9795238.134281691	11912155.291281164	18383949.39246904	0.78990789518664	-0.340244	0.194226621282202	0.833333333333333	0.612530143227225
Com_11892_pos	Nicotinic acid mononucleotide	C11 H14 N O9 P	335.041	1.414	336.048	Full match	No results	No results	Nucleosides, nucleotides, and analogues	Pyridine nucleotides	Nicotinic acid nucleotides	Nicotinic acid nucleotides	3572925.416858645	407095.9088852946	1768748.9860200568	2611327.888872308	4863823.442241025	15950159.503996668	8936145.146894263	1003899.3068528963	1778159.8192353724	313092.22958448034	196626.8520938613	859718.5382062617	2.22913198463767	1.1564820396326727	0.179264966547463	0.75	0.626943344099407
Com_119_pos	D-Phenylalanine	C9 H11 N O2	165.079	4.735	166.087	No results	No results	Full match	Organic acids and derivatives	Carboxylic acids and derivatives	Amino acids, peptides, and analogues	Phenylalanine and derivatives	18239201.95886022	14846337.5773186	15295784.363892227	14451777.69500095	16594985.491887342	63842126.67801341	1549059663.829142	2763111606.9017944	1904736955.2447748	2524411544.8723354	13762187.494519044	1350350277.4693754	0.0141775443565142	-6.14025	0.00530520180912066	0.833333333333333	1.22158605308074
Com_11974_pos	17beta-Trenbolone	C18 H22 O2	270.158	2.058	271.165	Invalid mass	No results	No results					3822387.58750162	4750418.201027597	15714704.98997672	5885129.093594429	3200406.00730716	12297688.583510555	6767490.535483325	9001171.28482552	9564206.33169904	9527934.625122253	10061312.527521929	11730938.65700037	0.806147793794698	-0.310884	0.21294236705551	0.666666666666667	0.688809926918164
Com_1199_pos	Cuminaldehyde	C10 H12 O	148.089	6.557	149.096	Full match	No results	No results	Lipids and lipid-like molecules	Prenol lipids	Monoterpenoids	Aromatic monoterpenoids	392813426.8583771	228761780.32688567	141264981.55632848	264545471.9996402	351292122.83077323	197469908.1100491	336663492.1531613	274650045.89463294	147369757.92066938	326941473.0196043	238350388.0986201	192663717.05347425	1.03923730200812	0.05552512040218724	0.916893605742478	0.472222222222222	0.295796794202307
Com_12_pos	2,3,5,6-Tetramethylpyrazine	C8 H12 N2	119.074	5.553	137.107	Invalid mass	No results	No results	Organoheterocyclic compounds	Diazines	Pyrazines	Pyrazines	2629049342.157353	4114532720.045331	17697556328.281734	9809859853.41349	1677995898.5195398	14315005700.614544	14728837307.542322	12182190929.774048	6944872994.013382	13193500316.596722	22795734762.998158	11508683923.11582	0.61759853069578	-0.695259	0.11788118582662	0.722222222222222	0.797409910819148
Com_12066_pos	L-Homocitrulline	C7 H15 N3 O3	189.112	1.147	190.119	No results	Full match	Full match	Organic acids and derivatives	Carboxylic acids and derivatives	Amino acids, peptides, and analogues	L-alpha-amino acids	7674222.692376799	7607473.552164466	3403871.6505986336	5512849.770198658	2376243.6995919747	5192945.841095487	18676357.86390433	10567970.915116562	9313773.89936756	7304606.230781487	9360389.542840084	9507303.800469115	0.490767956023467	-1.02689	0.00995616547058126	0.944444444444444	1.08936717899272
Com_121_pos	N-Acetyl-L-leucine	C8 H15 N O3	173.105	5.547	174.113	Full match	Full match	Full match	Organic acids and derivatives	Carboxylic acids and derivatives	Amino acids, peptides, and analogues	Leucine and derivatives	3389105012.609649	1715753281.3144605	1265228113.956971	1567777240.9636226	3152787218.9301567	1531310227.5158927	926864908.1835382	635583868.8752362	720047114.0053924	583030600.8591965	732946700.0517813	1039849031.6600084	2.72123420640635	1.4442611292741683	0.00123507852976323	1	1.28116461332341
Com_12116_pos	19-Nortestosterone	C18 H26 O2	274.191	7.126	275.198	Invalid mass	No results	No results	Lipids and lipid-like molecules	Steroids and steroid derivatives	Estrane steroids	Estrogens and derivatives	15167046.663120776	14392350.753039232	8920708.552469011	17193919.912701048	3053913.744422652	7224362.838986581	12513481.988340229	11385832.16454532	12891659.691929933	14423532.808345336	4457106.212605028	14281746.888999706	0.942803929588905	-0.0849703	0.679376028083401	0.472222222222222	0.20468646075654
Com_1215_pos	DL-Norvaline	C5 H11 N O2	117.079	6.23	118.086	No results	No results	Full match	Organic acids and derivatives	Carboxylic acids and derivatives	Amino acids, peptides, and analogues	Alpha amino acids	280008758.40362483	319220270.6826804	285636930.47850484	246601943.098054	310538487.8212463	275933465.2953672	214983754.27318463	251259892.01098117	222714354.7276324	232693064.95958832	300688312.9340748	345396555.12976885	1.09580945265293	0.1319969537617194	0.263757330892121	0.694444444444444	0.54689527911373
Com_12151_pos	3-(3-pyridinyl)propanoic acid	C8 H9 N O2	151.061	3.139	152.068	Invalid mass	No results	No results					10370098.700043298	9533497.929018496	9760893.168038206	7608170.185648509	12072328.972174486	6556992.723809125	15826493.073281888	13028419.260164456	16153659.3972628	9451181.799334494	7386164.535419591	11998653.783624206	0.757022219493347	-0.401592	0.122293320835558	0.722222222222222	0.746253237741429
Com_12205_pos	Phenylpropiolic acid	C9 H6 O2	146.037	5.139	147.044	No results	No results	Full match	Benzenoids	Benzene and substituted derivatives	Not available	Benzene and substituted derivatives	1057729.1116754708	13840911.306592714	8909047.420154093	14545085.882940909	20629015.97399653	9796135.325431172	5326054.300031108	4768893.428023894	4759789.592565861	5656114.24177028	5468789.250305715	6820174.873289621	2.09689974112189	1.0682578836356977	0.348748586979945	0.833333333333333	0.475401544546638
Com_1221_pos	Prolylleucine	C11 H20 N2 O3	228.147	5.954	229.155	Full match	No results	Full match	Organic acids and derivatives	Carboxylic acids and derivatives	Amino acids, peptides, and analogues	Dipeptides	6066877.836260907	5455826.584069382	4567589.352681688	4684479.875957474	5392426.272998407	4399985.164936169	297698708.7992234	273790637.98614764	266378211.9777723	277985170.4195746	320692034.33181137	321608067.05856574	0.0173859658588043	-5.84593	5.80033407382224e-13	1	1.51132051268665
Com_12239_pos	Debromohymenialdisine	C11 H11 N5 O2	245.09	3.166	246.098	Full match	No results	No results	Organoheterocyclic compounds	Pyrroloazepines	Not available	Pyrroloazepines	20158251.21215319	16847177.76634079	7021321.97304299	13641680.350314973	18661697.93421586	6231128.676818537	3894399.768557049	3359369.1589844907	3180721.727080312	3210782.6804914805	3976903.91556816	5949535.84630117	3.50255654195345	1.8084083403455793	0.00130659889932366	1	1.29336781171141
Com_12268_pos	Epinephrine bitartrate	C13 H19 N O9	333.107	5.15	334.115	No results	No results	Full match	Benzenoids	Phenols	Benzenediols	Catechols	1328606.972592028	1184485.6850439848	14966565.091060575	3406812.879872279	1310582.8233435245	6700983.0329466965	2701123.378968412	2777845.8445589123	2526314.751940448	2789295.2493913863	2793955.565895752	2504684.2795233126	1.79566538917186	0.8445185380760056	0.811430127469527	0.5	0.426679572607061
Com_12391_pos	2,6-Dihydroxypurine	C5 H4 N4 O2	152.034	1.668	153.041	No results	No results	Full match	Organoheterocyclic compounds	Imidazopyrimidines	Purines and purine derivatives	Hypoxanthines	19692438.566843968	15805699.399821786	5742758.587807604	10750070.214940792	17597466.196856976	4490397.692834094	8887176.422604656	5505336.196792432	4811768.390179304	5193413.881458192	7057311.736416522	10816558.066705974	1.75245064134909	0.8093738105790033	0.143825439509985	0.722222222222222	0.774737780485217
Com_12474_pos	THJ2201 N-(5-hydroxypentyl) metabolite	C23 H22 N2 O2	358.174	3.892	359.181	Invalid mass	No results	No results	Benzenoids	Naphthalenes	Naphthalenecarboxylic acids and derivatives	Naphthalenecarboxylic acids and derivatives	654250.7361492607	1780332.6819263648	6041685.717037558	2508892.464452873	570924.0316290085	3951513.5716669927	7435882.148589892	8805254.027091874	15349682.681829264	11658945.052995251	10417227.923099156	6476622.470658208	0.25784282142423	-1.95544	0.00671288675725714	1	1.20204810851202
Com_1248_pos	5-(1-azepanyl)-2,4(1H,3H)-pyrimidinedione	C10 H15 N3 O2	209.117	5.443	210.124	Full match	No results	No results					267195977.96779585	232422386.80128068	156372781.72258854	315693696.6681463	279746308.0630605	158974558.37878436	65476948.16257976	97252978.70264097	89954394.78711903	111250343.99603388	65050782.270187296	82496138.5389432	2.75749068381925	1.463356011680494	9.00303122434461e-05	1	1.36156375068082
Com_12492_pos	3,4,10,11-tetramethoxy-7,8,12b,13-tetrahydro-5H-6-azatetraphene	C21 H25 N O4	355.175	4.255	356.182	Invalid mass	No results	No results					291721.29632348154	260016.60272283843	261006.77297416527	258370.19948895808	288573.9617440594	245698.1857150973	6785795.199433325	15599175.564840676	12724177.830672884	8674348.854652004	11026472.945846248	8504379.467782332	0.025355816216017	-5.30154	3.36703953098593e-07	1	1.50194425786519
Com_12635_pos	cis-7-Hexadecenoic Acid	C16 H30 O2	254.225	6.353	255.232	No results	No results	Full match	Lipids and lipid-like molecules	Fatty Acyls	Fatty acids and conjugates	Long-chain fatty acids	15381630.792981395	4598990.405350046	9279009.306908537	9142563.369656837	9787620.648717787	8010563.121455071	13397461.562721156	7121829.386824835	9188958.056857483	9737557.936795896	7152793.164205038	11883198.068535477	0.960989220543344	-0.0574078	0.714005669926775	0.527777777777778	0.296046212127426
Com_12766_pos	Proline-hydroxyproline	C10 H16 N2 O4	228.115	6.114	246.149	No results	Invalid mass	No match	Organic acids and derivatives	Carboxylic acids and derivatives	Amino acids, peptides, and analogues	Dipeptides	12276846.730992911	15907567.197788715	6985654.817066265	8399686.34302839	17690906.066334542	11953603.63255267	6983818.784243282	9879418.23508958	13400519.124079611	14362012.567443566	7949957.991578822	8916458.35513088	1.19062714585966	0.2517216927683115	0.421072877268086	0.638888888888889	0.412103907970223
Com_12778_pos	Magnolol	C18 H18 O2	284.141	6.111	285.149	Invalid mass	No results	No results	Benzenoids	Benzene and substituted derivatives	Biphenyls and derivatives	Biphenyls and derivatives	16150896.694155945	12698074.860690666	13383690.249335676	12017338.233907346	18756067.919251345	9166140.814459631	13633861.092076294	9815079.53388678	6375278.499545139	11667106.099090504	9644375.779601878	12710626.978340248	1.28703108492427	0.3640468985660086	0.120585323360304	0.722222222222222	0.745883984502375
Com_12784_pos	Alanyltyrosine	C12 H16 N2 O4	252.111	4.833	253.119	Full match	No results	No results	Organic acids and derivatives	Carboxylic acids and derivatives	Amino acids, peptides, and analogues	Peptides	2785937.237936944	3496580.3395307907	2756722.8924367256	2783065.99505945	1942803.5796032413	3691761.765051779	6811785.012142175	14850241.878458263	7475381.729681568	9904914.024991462	5874489.076114277	9451391.238774711	0.321086055068074	-1.63897	8.78112171907508e-05	1	1.36661373138245
Com_12851_pos	N-(4-methoxy-1-methyl-1H-indazol-3-yl)-5-methyl-3-isoxazolecarboxamide	C14 H14 N4 O3	286.108	4.901	287.116	Invalid mass	No results	No results					8507914.973081045	12108474.892343894	13613743.66057176	9806906.665550726	3801362.363587402	12525084.444869827	1563412.0714802889	1432656.125327934	1528832.555447279	1618927.356151557	1457149.7293199974	1587267.4946828592	6.56964249605777	2.71581486473364	0.000213549672504181	1	1.44281715830822
Com_1287_pos	Cer 12:0;2O/2:0	C14 H29 N O3	259.215	5.683	260.222	No results	Full match	No results					333073652.0008873	317951435.3369265	150299517.27953985	295631261.2711106	313062222.63823533	126092263.2643649	118515776.21679392	83772344.15242866	89506801.40982525	91698534.76344316	86733512.71057266	170909556.31183684	2.39591770323428	1.2605783542139855	0.00344969496157018	0.944444444444444	1.20053738920579
Com_12893_pos	Diflorasone	C22 H28 F2 O5	410.191	2.062	393.188	No results	No results	Full match	Lipids and lipid-like molecules	Steroids and steroid derivatives	Hydroxysteroids	21-hydroxysteroids	2125017.045725421	2479314.7199889924	5419673.018186244	3080734.520114604	464426.7894054476	3709598.618368194	15652785.172076274	12769889.948295208	14347204.37265443	13468895.0264717	14484449.261337308	13340105.397447951	0.205544615954286	-2.28248	0.0034223528274839	1	1.28933115249494
Com_1291_pos	1-[(3S)-3-(1,3-Benzoxazol-2-yl)-1-pyrrolidinyl]-3-methoxy-1-propanone	C15 H18 N2 O3	274.132	6.181	275.139	Full match	No results	No results	Organoheterocyclic compounds	Benzoxazoles	Not available	Benzoxazoles	19693904.17074545	17248671.81813973	14888952.827808576	15422627.463451572	20123733.240476727	14764965.776708016	141893250.9393549	217681828.0242909	184102041.8849204	307426211.3217715	198141304.9129773	63848728.80526893	0.0917648585712209	-3.44591	7.47143811621677e-05	1	1.44146482173067
Com_1294_pos	4-oxo-4-[(pyridin-4-ylmethyl)amino]but-2-enoic acid	C10 H10 N2 O3	206.069	5.207	207.076	Full match	No results	No results					165996044.21715003	95479720.16973348	60394344.95527893	307136767.4034016	161767432.03090182	77227429.66144188	4540547.132919429	4553070.079961858	4548853.915327331	4945599.004612879	4477277.91236683	4260173.328517943	31.7652397759237	4.989377004069523	3.6465645855636e-05	1	1.4685897150375
Com_12944_pos	Abametapir	C12 H12 N2	184.1	5.354	185.107	No results	No results	Full match	Organoheterocyclic compounds	Pyridines and derivatives	Bipyridines and oligopyridines	Bipyridines and oligopyridines	11297812.187017344	7504258.014006699	8922427.707683204	6384837.39981334	14835264.989351165	11228885.792183356	16236650.431777889	5159598.696355633	5731327.532453158	5332320.91442419	5012550.822939598	8169984.839767616	1.31836718206182	0.3987522352657835	0.166689844078555	0.777777777777778	0.663085930930273
Com_13085_pos	Taurochenodeoxycholic acid	C26 H45 N O6 S	516.322	9.584	517.329	Invalid mass	No results	No results	Lipids and lipid-like molecules	Steroids and steroid derivatives	Bile acids, alcohols and derivatives	Taurinated bile acids and derivatives	3227713.994859652	1800220.174129297	1460075.001612051	1121581.6451919463	1611519.6177928897	641635.4723143211	7735153.315795636	5414933.317600969	6958772.987329959	4133689.685721981	4544032.12951425	8949647.235142803	0.261360137279749	-1.93589	0.000493052017678293	1	1.33823010295383
Com_1320_pos	Pipecolic acid	C6 H11 N O2	129.079	1.429	112.076	Full match	Full match	Full match	Organic acids and derivatives	Carboxylic acids and derivatives	Amino acids, peptides, and analogues	Alpha amino acids	235025461.85478944	172594630.99095425	242529401.9988616	244238529.21979943	217253005.87993225	269414726.5529123	243712529.5684929	231963840.02651143	250847353.0885729	250281828.96635187	267823996.2507664	274207257.1485661	0.909285152892022	-0.137195	0.173319695364321	0.75	0.656701590236993
Com_13225_pos	TG 16:0_18:1_18:1	C55 H102 O6	875.791	10.063	876.798	No results	Invalid mass	No results					10418532.755989851	9536985.011180896	8107653.778201701	7795720.447901366	11612139.788558569	9880033.38362079	9958044.5878238	10063045.476038111	12096038.566196622	11722485.577416245	11673852.279048	7871389.488451945	0.904807059719381	-0.144318	0.299098588559046	0.75	0.498482905809438
Com_1336_pos	Styrene	C8 H8	104.063	6.243	105.07	No results	No results	Full match	Benzenoids	Benzene and substituted derivatives	Styrenes	Styrenes	320558906.2910793	250175727.78837743	206208918.8214304	261828322.6482533	360970373.7759046	186536497.1606061	229645409.68672323	173445330.14889172	184720382.07876524	244656080.74353567	206296775.0517169	164499832.63694304	1.31831335144099	0.39869332697655896	0.0623900483592045	0.833333333333333	0.871162706821732
Com_13494_pos	Pyridoxal 5'-phosphate	C8 H10 N O6 P	247.025	2.437	248.032	Full match	Full match	Full match	Organoheterocyclic compounds	Pyridines and derivatives	Pyridine carboxaldehydes	Pyridoxals and derivatives	15931997.461522363	14055633.624551913	4848957.063011694	12425640.704195531	9289076.729897816	4163089.714166112	6588780.863493348	2448323.2614068687	3203707.794767935	3073374.066635298	3456992.9539736626	7658883.93843626	2.29717180681566	1.1998587607522908	0.0231605952770168	0.888888888888889	1.00914678898472
Com_1350_pos	Nicotinic acid	C6 H5 N O2	123.03	2.688	124.037	Invalid mass	Invalid mass	No results	Organoheterocyclic compounds	Pyridines and derivatives	Pyridinecarboxylic acids and derivatives	Pyridinecarboxylic acids	56357958.24941402	70031304.07749018	221013993.6480926	94685461.25172672	48373810.840671785	197439879.7404439	296902718.6823783	278375592.72216153	277814075.11240846	269626784.5686922	282855318.73573107	232849636.9695957	0.419856126725363	-1.25203	0.0103446137634519	1	1.19115169851062
Com_13569_pos	Lactobionic acid	C12 H22 O12	358.111	4.973	359.118	No results	No results	Full match	Lipids and lipid-like molecules	Fatty Acyls	Fatty acyl glycosides	Fatty acyl glycosides of mono- and disaccharides	1109581.777686584	1120976.1097233382	2172189.3850691267	1214057.8394942863	1057545.5883520031	1272317.2188967806	9381269.91500432	8170781.679355334	10755220.143500324	11474280.320747444	11343814.0468276	14304381.942394068	0.121453439090322	-3.04152	6.5062591236461e-08	1	1.48029305921477
Com_13656_pos	FRH	C21 H30 N8 O4	458.24	4.658	230.127	Full match	No results	No match					15865729.472037928	8347348.301853145	5809564.177404694	8314508.419167509	8954183.544274407	4263132.690326866	821758.6635292858	607506.8577199562	620602.7983505188	662283.466355265	567160.7570743787	635745.4124189126	13.1682511962102	3.718991856724771	1.42324548132867e-05	1	1.46708025900143
Com_1367_pos	Feruloyl Putrescine	C14 H20 N2 O3	264.147	5.6	282.181	No results	No results	Full match	Phenylpropanoids and polyketides	Cinnamic acids and derivatives	Hydroxycinnamic acids and derivatives	Coumaric acids and derivatives	115863920.47651084	137919038.67969853	261081565.0672177	127150084.74807192	106471650.99688251	213407673.57836252	304251421.4383363	198374773.64707887	252682277.529565	229466553.71047175	219303721.1498851	184391515.56254056	0.692772441119616	-0.529547	0.0395953776234968	0.805555555555556	0.966799371013135
Com_13700_pos	PC 19:0_19:0	C46 H92 N O8 P	817.652	10.091	818.659	No results	Invalid mass	No results					2959839.2692058105	2596603.8477937654	2172271.468779772	2541335.8688596995	3172711.59712563	2249965.748385665	14193175.014774162	2555159.434514755	2533066.771893023	2622205.561614304	3722609.121348275	2707578.973815303	0.553851959038404	-0.852428	0.271324911719031	0.694444444444444	0.570220584789541
Com_13756_pos	Estrone	C18 H22 O2	252.153	6.218	253.16	Invalid mass	No results	No results	Lipids and lipid-like molecules	Steroids and steroid derivatives	Estrane steroids	Estrogens and derivatives	15382291.766059063	8687329.088053005	6839752.797902944	12770571.101432128	12948604.30207113	11647120.424377011	5250662.35077309	5464025.027490026	4184596.412198265	6473708.109982514	3319217.1995463013	5201521.113916314	2.28394613155817	1.1915286241463028	0.000450787921067637	1	1.29276683071502
Com_13764_pos	3-(2-methylpropyl)-octahydropyrrolo[1,2-a]pyrazine-1,4-dione	C11 H18 N2 O2	232.121	6.025	233.128	Invalid mass	No results	No match					2674518.393828422	2530724.7247055084	2163550.8189702765	2241100.4094863045	2712757.588572072	2890636.7621856723	11217160.269697694	5226846.221902183	2796372.783516175	4415569.906563227	3805386.4504638254	13839356.328580812	0.368354329564642	-1.44083	0.0223248194815395	0.972222222222222	1.09559917324201
Com_13821_pos	Ecgonine methyl ester	C10 H17 N O3	199.121	1.46	200.128	Full match	No results	No results	Alkaloids and derivatives	Tropane alkaloids	Not available	Tropane alkaloids	7142911.076873835	5513332.815952722	5498198.874819904	6938164.40756861	7428569.758769348	5400179.356220366	7750020.472642092	9187236.592805527	12194048.81355456	7267162.820427933	11542383.142573588	8725140.254585996	0.669208371496719	-0.579473	0.00456163932740689	0.972222222222222	1.16573898635508
Com_13853_pos	Pyroglutamic acid	C5 H7 N O3	147.053	7.461	148.06	No results	Invalid mass	No match	Organic acids and derivatives	Carboxylic acids and derivatives	Amino acids, peptides, and analogues	Alpha amino acids and derivatives	4228710.512580719	3532033.2061635745	3788181.343458732	3712242.714662244	15622514.645394256	7619986.807632755	1810647.1959623783	876979.7069310276	1063184.2004128068	408710.71342256607	1501883.9503203726	1465383.146733377	5.40266727353603	2.4336718354725666	0.000595837927703004	1	1.27058629326625
Com_13860_pos	(1R,2R)-trans-N-Boc-1,2-cyclohexanediamine	C11 H22 N2 O2	214.168	3.742	215.176	No results	No results	Full match	Organic nitrogen compounds	Organonitrogen compounds	Cyclohexylamines	Cyclohexylamines	481314.4731918456	1193287.574541852	11441716.249375084	1903787.5272525137	373405.0376618943	6786313.469168917	5335353.3124826085	3715894.083480009	5546368.342335351	4782966.694895469	5186586.951915557	2113779.075043408	0.831298196326017	-0.266562	0.190869536732496	0.666666666666667	0.740167490907257
Com_13917_pos	3,6-bis[(1H-indol-3-yl)methyl]piperazine-2,5-dione	C22 H20 N4 O2	394.135	1.54	395.143	Invalid mass	No results	No results					919382.7648663388	792090.0367334911	2452415.574926944	888727.9988189987	798448.9479642462	918758.7433546252	3092148.4676550264	5936781.347872062	8312161.200697773	12710771.190104531	10708401.692405293	5465420.756372888	0.146451569450505	-2.7715	4.40267926199854e-05	1	1.37381813374201
Com_1393_pos	5-Methyl-2-(4-methylphenyl)-2,4-dihydro-3H-pyrazol-3-one	C11 H12 N2 O	188.095	5.107	189.102	Full match	No results	No results					31823933.013779897	295374661.4011318	17798248.242455054	18816032.73614845	8049199.196090297	18874356.560096662	11259458.747456435	77175033.8284431	6129538.279006875	69983442.4394965	38319831.27595728	4582926.896989958	1.88351889697071	0.9134305076304984	0.653075652785891	0.444444444444444	0.26706137777297
Com_13947_pos	2-[5-(2-hydroxypropyl)oxolan-2-yl]propanoic acid	C10 H18 O4	240.079	5.56	241.086	Invalid mass	No results	No results					10449768.23355424	11390419.950123483	11294204.944307469	10718497.939137684	10533004.23791456	10135302.725743294	8059158.626045602	10110765.344448714	10237516.357287072	10741937.802510304	9728764.324621206	8844292.077574486	1.11778372747717	0.16064107773468023	0.0466267030410776	0.861111111111111	0.944296695257119
Com_1395_pos	L-Threonine	C4 H9 N O3	119.058	6	120.066	No results	No results	Full match	Organic acids and derivatives	Carboxylic acids and derivatives	Amino acids, peptides, and analogues	L-alpha-amino acids	342304123.7327007	241051619.9687144	197732451.579178	170589059.97802585	243686495.7766177	194261827.00061423	238129508.4355563	188536054.61707497	208925371.15509388	180329243.05076995	205759250.631991	261486478.99853668	1.08296641188429	0.1149884985700527	0.608167834797893	0.555555555555556	0.403721615327325
Com_13971_pos	L-Homocystine	C8 H16 N2 O4 S2	268.055	1.466	269.063	Full match	Full match	Full match	Organic acids and derivatives	Carboxylic acids and derivatives	Amino acids, peptides, and analogues	L-alpha-amino acids	10071596.107426751	12981855.147641964	10090445.242825491	11378274.428886477	4976937.931152373	9329315.346912574	7360358.428053934	7973878.803167724	6098274.989418663	4849472.186304143	4195421.909716217	6887601.628794359	1.57442557728672	0.6548255632421393	0.029142556561255	0.888888888888889	0.963422290051376
Com_14_pos	Palmitic Acid	C16 H32 O2	273.267	6.379	274.274	Invalid mass	No results	No results	Lipids and lipid-like molecules	Fatty Acyls	Fatty acids and conjugates	Long-chain fatty acids	15249034964.073494	14607304213.897335	8170417790.709299	17264959564.319088	18899691501.252228	11061069024.622543	13205518969.9355	11253641984.61968	5193358445.393359	9994376970.660742	8931178942.931545	7970314893.672263	1.50760219250237	0.5922557982244829	0.0479041578828874	0.833333333333333	0.889406940512474
Com_14061_pos	2-hydroxy-3,6-diphenylcyclohexyl acetate	C20 H22 O3	292.142	4.937	293.15	Invalid mass	No results	No results					9272594.856377857	1926892.80874684	7792045.166692444	12436073.413546309	8451384.842218015	9069954.034893494	4107628.411905458	3476430.809022992	4091302.663535388	920223.3987325524	4199581.186288085	5770085.450257334	2.16921775553725	1.1171748842988327	0.0687183061238328	0.861111111111111	0.817334105180804
Com_1414_pos	Gamma-Caprolactone	C6 H10 O2	114.068	5.765	132.102	No results	No results	Full match	Organoheterocyclic compounds	Lactones	Gamma butyrolactones	Gamma butyrolactones	198222009.03236708	112749201.67566632	102991412.32673693	140071141.21188024	118037376.66548316	91275114.85481872	301781189.4971009	214936650.54044244	195809998.34495643	224154573.116571	261195875.3101212	290026038.814946	0.513034502703491	-0.962872	0.000686089449082342	0.972222222222222	1.31639744004423
Com_14169_pos	Dehydroepiandrosterone	C19 H28 O2	288.209	6.796	289.216	No results	No results	Full match	Lipids and lipid-like molecules	Steroids and steroid derivatives	Androstane steroids	Androgens and derivatives	7186769.171074919	4796822.580122419	4214010.661703087	2703603.917993098	5622436.700430682	3950761.8320089057	1163732.8609402687	1864613.7334810728	3145563.864082713	1521664.791764568	1606370.413790482	12962038.827022487	1.27894469539984	0.35495388001511813	0.156620146967155	0.805555555555556	0.702274833483461
Com_14193_pos	β-Nicotinamide mononucleotide	C11 H15 N2 O8 P	334.057	1.42	335.064	Full match	Full match	Full match	Nucleosides, nucleotides, and analogues	Pyridine nucleotides	Nicotinamide nucleotides	Nicotinamide nucleotides	4119819.769985851	1878691.929990237	3039587.4270611703	2242516.136734899	2617017.62823864	9548149.231008442	13072187.594639562	2761905.6908698264	3817353.5644421424	1298689.6372767475	2613087.951600516	4262555.001407289	0.842592106840199	-0.247094	0.864161766606315	0.555555555555556	0.0837236864081171
Com_1422_pos	Amitriptyline-d3	C20 H20 [2]H3 N	258.22	7.23	281.209	Invalid mass	No results	No results					98423380.2548398	101913416.55164506	56077111.92333032	38450494.125571616	102808974.5305017	56037229.92088207	299420130.18793863	41717642.87269187	122476986.88139538	80940504.28022489	34308840.62286389	205568141.7831292	0.578393620681675	-0.789876	0.432654770338685	0.611111111111111	0.484583081565844
Com_14278_pos	(3R)-4,4-Dimethyl-2-oxotetrahydro-3-furanyl beta-D-glucopyranoside	C12 H20 O8	292.122	7.274	293.129	Invalid mass	No results	No results					6470076.751017305	5294216.304776385	4637433.053470161	6421645.857432404	10695825.664739124	9870471.001680264	9706818.202744858	9309717.525676742	7959002.183015051	7778910.469762413	11850492.976041038	9738663.713007849	0.770090386992781	-0.3769	0.0869502852527807	0.722222222222222	0.824622930090938
Com_14294_pos	6-(3-hydroxybutan-2-yl)-5-(hydroxymethyl)-4-methoxy-2H-pyran-2-one	C11 H16 O5	245.125	5.784	246.133	Invalid mass	No results	No results					9222346.634895973	6509344.121711902	5678292.457421366	4849580.030787976	5597119.876493981	3407809.998162223	12833545.409292964	5543588.382081833	5687381.206095429	5081874.555260099	6390847.717257024	8406415.453875665	0.802493441796282	-0.317438	0.310561866484062	0.638888888888889	0.56461976211677
Com_14372_pos	Methanandamide	C23 H39 N O2	401.29	5.773	402.297	Invalid mass	No results	No results	Lipids and lipid-like molecules	Fatty Acyls	Fatty amides	N-acyl amines	14040435.58524381	10924380.369538927	2264185.6091784034	5359734.072160443	14112564.662474988	2839260.0975203807	1978948.311912802	2230207.7249332177	2111538.913395524	2412661.3113964307	2246281.845815823	8234192.43619788	2.57838020813009	1.366465019300447	0.0593430236102851	0.888888888888889	0.908585613500602
Com_14373_pos	4-(beta-D-Glucopyranosyloxy)-2-methylenebutanoic acid	C11 H18 O8	300.078	2.307	301.085	Invalid mass	No results	No results					4812268.922520261	1735709.0873692606	4590343.319347153	4669758.698458426	3563526.1817686465	10476826.482495168	4955354.825672343	2901510.316696043	4190993.35197312	2938061.2348654983	2452767.898747607	3320729.810050684	1.43782612306422	0.5238892205893476	0.356870430185804	0.694444444444445	0.469044626374606
Com_1438_pos	3-Methylindole	C9 H9 N	131.074	5.246	132.081	No results	No results	Full match	Organoheterocyclic compounds	Indoles and derivatives	Indoles	3-methylindoles	26486946.869974226	2817985.870420187	9660840.4819259	10507503.280713787	10679196.240940563	5581928.152929036	238463776.09014872	264935882.65866053	246374340.16217023	273221299.8440845	263006919.5822205	166598846.088446	0.0452528932456008	-4.46585	6.72380833916098e-05	1	1.45039899092881
Com_14390_pos	3-benzyl-4-hydroxy-5-(4-hydroxyphenyl)-2,5-dihydrofuran-2-one	C17 H14 O4	264.075	4.543	265.082	Invalid mass	No results	No results					9775166.355221374	12066026.899634374	8535537.417212062	10895995.662608454	7673203.124470188	8329603.428638218	7707069.280411679	5500984.55788091	6267591.736426048	4948835.1147687705	4505794.21649912	4953932.945168432	1.69033117549574	0.757305931973523	0.000606927134226922	0.972222222222222	1.27198819112752
Com_14436_pos	HexCer 18:1;2O/24:0	C48 H93 N O8	811.692	10.995	812.699	No results	Full match	No results					1577712.6626142357	1323679.7361386828	1074386.686830922	1253725.2303210583	1635033.5578592191	1135879.4690084334	1684384.7860702286	372430.80767558696	1435353.560738755	1439993.0182465592	1397469.2441945833	12375197.949642168	0.427719343811396	-1.22526	0.622882109280897	0.666666666666667	0.389542209633881
Com_14460_pos	Glu-Glu	C10 H16 N2 O7	276.096	4.911	277.103	No results	No results	Full match	Organic acids and derivatives	Carboxylic acids and derivatives	Amino acids, peptides, and analogues	Dipeptides	13858158.183490269	2579428.851776175	5990066.369298359	2966737.551932069	10092558.773326688	8093295.195046153	3906280.3011785527	1077798.838297191	3246778.316311999	2097931.910176995	2888828.602892157	3497496.689246317	2.60723577530129	1.3825210533289016	0.0303096446053422	0.805555555555556	0.953555707615764
Com_14553_pos	Norbutorphanol	C16 H21 N O2	259.153	1.277	260.161	Invalid mass	No results	No results	Benzenoids	Phenanthrenes and derivatives	Not available	Phenanthrenes and derivatives	2769976.033568501	2942018.761971432	5723705.562631742	2914387.560533912	1226693.108272688	3104457.5232878258	10833721.284227887	8969446.53252954	10111000.331559278	10542544.974638902	11313781.27489463	7431956.211734337	0.31554839973536	-1.66407	0.00107025555590477	1	1.33136847839487
Com_14593_pos	Ohmefentanyl	C23 H30 N2 O2	366.227	3.895	184.121	Invalid mass	No results	No results	Organoheterocyclic compounds	Piperidines	Fentanyls	Fentanyls	650774.9501529803	878735.9022291173	3097978.64626389	1251797.1627935062	684077.9851913354	3708820.441242133	11507797.130223565	9801284.54944429	10499883.638398418	11285175.922183404	10690984.75502239	9974274.413322022	0.161108558456399	-2.63389	0.0010961559215658	1	1.36425255227355
Com_14669_pos	Lidocaine N-oxide	C14 H22 N2 O2	233.141	6.272	234.149	Invalid mass	No results	No results	Organic acids and derivatives	Carboxylic acids and derivatives	Amino acids, peptides, and analogues	Alpha amino acids and derivatives	2299831.812409248	2204825.4196083187	6425737.848877446	1799937.588681627	2308843.458503814	2219729.411200906	2182958.4293878484	7152359.338167631	6188324.067988501	7454289.1041874755	11046014.36448292	2381218.8427760224	0.474078498028367	-1.0768	0.0650176013876448	0.805555555555556	0.86290289589284
Com_14676_pos	N-{4-[(2R,3R)-3-(Hydroxymethyl)-5-oxo-2-morpholinyl]phenyl}acetamide	C13 H16 N2 O4	246.101	2.592	247.108	Invalid mass	No results	No match	Organoheterocyclic compounds	Oxazinanes	Morpholines	Phenylmorpholines	10053297.3938657	7530166.9882704755	9916415.819328388	10780462.520077176	4476203.733950766	4387527.740930564	6143731.447338151	2841511.5140218963	3868764.7422154336	3432117.317879173	3382560.7424908434	3840302.57666932	2.00536380015024	1.0038639848408217	0.00970095170781863	0.944444444444444	1.09348859168749
Com_14680_pos	1-(7-methoxy-2-oxo-2H-chromen-8-yl)-3-methyl-2-oxobutyl acetate	C17 H18 O6	340.088	3.321	341.096	Invalid mass	No results	No results					6540171.173806634	7506564.907572461	5840645.539560407	8573104.311677964	7001999.613173434	9905014.402455322	9795591.342631835	4581867.501779345	827707.967852263	4979357.351242372	4695052.087050685	5140932.120244627	1.51121691171533	0.5957107518305297	0.135309002757679	0.861111111111111	0.729488367084411
Com_14805_pos	gamma-Glutamylcysteine	C8 H14 N2 O5 S	250.062	1.807	251.07	No results	No results	Full match	Organic acids and derivatives	Carboxylic acids and derivatives	Amino acids, peptides, and analogues	N-acyl-alpha amino acids	13008839.949417634	6913385.085366864	6638509.655474667	5481635.729354426	8467180.880902871	6495213.659200276	5425041.684509523	4418562.359629084	2992682.386218456	3832772.8294680193	4837892.320164617	4595318.434176011	1.80079222742724	0.8486317349631385	0.00463142726823754	1	1.1562859951538
Com_14878_pos	SPK	C14 H26 N4 O5	313.164	1.436	331.198	Invalid mass	No results	No results					3017455.130791679	5731238.007998039	5399936.139417477	5407193.405391334	1129624.3387363085	3672235.877216637	4237385.283534017	8889389.41314164	9451446.853501044	8128156.071996923	9677636.09615844	11418497.777920494	0.470202741064273	-1.08865	0.0205807216090814	0.916666666666667	1.02271383478295
Com_14944_pos	4-Methoxycinnamic Acid	C10 H10 O3	178.063	9.043	161.06	No results	No results	Full match	Phenylpropanoids and polyketides	Cinnamic acids and derivatives	Cinnamic acids	Cinnamic acids	11214255.74672825	10292148.319456512	8150318.778351755	10345851.319970123	12889156.570713509	8655159.87280317	11451426.429390185	8950892.962467156	9291540.211020796	10390822.660277223	10012614.301082589	10017789.920740869	1.02381771709506	0.0339588773962397	0.85160996271223	0.527777777777778	0.431479209450201
Com_1505_pos	1,3,5-Trimethylpyrazole	C6 H10 N2	110.085	4.639	111.092	No results	No results	Full match	Organoheterocyclic compounds	Azoles	Pyrazoles	Pyrazole-4-carboxamides	52158699.18866506	78948051.78874336	232082951.26722515	169288615.8830947	55034767.894497074	200103176.6450072	280251363.0468468	125057360.15560332	125986019.70040616	164210643.44749597	174936649.35592893	239750099.02916196	0.709441400298625	-0.495245	0.163428352991011	0.694444444444444	0.691556362725345
Com_15114_pos	YQH	C20 H26 N6 O6	241.107	5.013	242.114	Invalid mass	No results	No match					9652271.532906724	10669685.190846454	2796363.358320808	7473250.34914791	7197969.936053605	2407272.6751950854	4014561.920219578	4483987.5954094445	4368060.452507863	4411336.190506932	4436825.584739061	10095255.531021774	1.26365226586317	0.3375995146746293	0.637045855262352	0.583333333333333	0.454386268307935
Com_1518_pos	MPK	C16 H30 N4 O4 S	374.195	5.213	375.203	Invalid mass	No results	No results					307450347.2006177	195879575.2242129	43228032.16084548	110913052.47876924	245045393.84106395	60225706.00111804	57347526.80959948	17125538.417812496	26582781.140826408	24428826.466115534	18373817.87905856	90124794.01972304	4.11457642371617	2.0407439196244144	0.00868316259292919	0.916666666666667	1.11345302409502
Com_15190_pos	17alpha-Ethinyl estradiol	C20 H24 O2	296.178	7.078	319.167	No results	No results	Full match	Lipids and lipid-like molecules	Steroids and steroid derivatives	Estrane steroids	Estrogens and derivatives	4065460.715932652	3478807.1041099727	4246147.25723856	4798968.853489621	4298790.1395873455	5638924.221084044	10432700.13062955	8810133.876498774	9258543.629788231	10238039.18259431	6512114.150634673	6346921.466715206	0.514106471001286	-0.959861	0.000211225714708925	1	1.3287926826696
Com_15236_pos	H-Trp-NH2	C11 H13 N3 O	203.106	5.08	204.113	No results	No results	Full match					5731678.954536641	5134004.175947622	5092795.3202422885	10171151.404587349	3038058.3160084016	4569837.7253631065	7700226.070631049	8813825.896865519	7424242.84306621	7859354.654093969	8847050.594270868	3987972.1249345336	0.755893031851314	-0.403746	0.15052143746666	0.722222222222222	0.678490782078172
Com_15269_pos	6,6-dimethyl-4-piperidino-5,6-dihydro-2H-thiine-2-thione	C12 H19 N S2	241.095	2.31	242.102	Full match	No results	No results					3432933.7473205514	4154524.3051154274	5128713.394122233	3481491.1518165846	3269994.5827598674	9021152.176023738	4439316.417013137	3460258.252607792	3771369.309777242	3528952.061908813	3602235.080476566	3614816.407239317	1.2708603310185	0.3458054852452362	0.330196024905669	0.5	0.583289042604805
Com_15369_pos	Leukotriene D4	C25 H40 N2 O6 S	496.267	6.83	497.274	No results	Invalid mass	No results					9724186.471232094	6364715.698593405	6028648.7648655865	7113518.39953125	12070123.05607395	7661908.086839871	7977432.447092494	5938852.767905262	2416663.083003805	4172777.114923109	7183766.845541652	7787038.832941253	1.38015468172408	0.46482996704000934	0.130744589985491	0.694444444444444	0.730391970313664
Com_15388_pos	2-[1,1'-biphenyl]-4-yl-6-phenyl-1,3-benzoxazole	C25 H17 N O	347.133	1.664	348.14	Invalid mass	No results	No results					5915952.538781109	6927097.808015674	7330909.57936428	7271712.554090024	3833057.7031992273	8829669.039862135	7908992.21376632	6701982.091276052	6628954.098922115	5799876.958248437	5659260.241873392	7086557.113769405	1.00811289313594	0.011657207535788519	0.899890148726357	0.611111111111111	0.256867670415363
Com_15475_pos	4-acetyl-4-(ethoxycarbonyl)heptanedioic acid	C12 H18 O7	256.095	7.19	239.091	Invalid mass	No results	No results					9239052.205151092	10048701.286438782	7339193.140383519	6528250.047353879	8593934.905852562	7801775.31424783	5858572.350567777	6764250.713247425	4649567.068500166	9222075.557321196	7781804.576322439	6870572.1166133545	1.20424567306323	0.2681297402326046	0.121808242262202	0.777777777777778	0.718724757855822
Com_15561_pos	N-Desmethylclomipramine	C18 H21 Cl N2	600.287	3.891	301.151	Invalid mass	No results	No results	Organoheterocyclic compounds	Benzazepines	Dibenzazepines	Dibenzazepines	176798.99628033608	164291.8076762817	197775.5454031084	172854.98577063964	154281.5164999728	197991.04893164543	4633977.407128952	7739386.165539063	5101382.719184541	6206379.485713736	9562212.703733154	892256.487370758	0.031169631041689	-5.00372	0.000202225487710035	1	1.42870057347141
Com_156_pos	DL-2-(acetylamino)-3-phenylpropanoic acid	C11 H13 N O3	207.09	5.562	208.097	Full match	Full match	Full match					2597519562.7798214	1361863508.343811	847906406.3732882	1285848625.6792254	2163413225.31444	1001425289.0009568	586140047.2859154	349171302.8639583	396026949.8474025	344047113.83750385	358749984.9186202	570971537.4799188	3.55377988086643	1.8293543244118653	0.000348826739752172	1	1.33758190148015
Com_1564_pos	Bufotenin	C12 H16 N2 O	204.127	5.047	205.134	Full match	No results	No results	Organoheterocyclic compounds	Indoles and derivatives	Tryptamines and derivatives	Serotonins	30167033.85426565	41997705.253811136	223035181.69461447	69159746.62497713	54649040.6611112	113014018.244573	55443478.726304114	43521200.91905716	52732488.25744741	48985546.01394827	56851590.57412523	49675591.84949009	1.73178902330639	0.7922631832001824	0.32802848631103	0.611111111111111	0.623607524829266
Com_1579_pos	5-Methyl-8-nitro-3-spirocyclohexyl-2,3,4,5-tetrahydro-1H-2-benzazepine	C16 H22 N2 O2	274.168	5.067	275.175	Full match	No results	No results					13783948.188617695	15843855.564712096	153055298.9502259	12471538.965746049	20751140.845556315	220737684.031144	42346212.67201144	24562723.9183709	61227668.89374398	50930746.68001452	55397109.73283792	43400745.76585284	1.57142187832251	0.652070551768747	0.683255133752317	0.666666666666667	0.39034684311569
Com_15803_pos	2-oxo-2H-chromene-3-carboxylic acid	C10 H6 O4	190.027	4.642	191.034	Full match	No results	No results					11071279.632581204	9399008.26244386	5651917.462710479	8405364.866972432	10417563.546031004	4196250.8644883735	4730753.971720258	4366483.784108084	4988668.448580318	4216958.76379941	5181551.009230256	6728790.871044445	1.62648688309282	0.7017591877198098	0.0364466400019801	0.805555555555556	0.993311694808966
Com_15883_pos	EPH	C16 H23 N5 O6	363.158	2.119	364.165	Invalid mass	No results	No results					308429.2875426908	287569.2414686292	369568.8366606124	301275.2692855683	302049.7822517279	362483.3717094405	9839740.08026046	3305625.131454718	3220911.357578806	2353594.9782857383	5959407.469214196	2808964.735016219	0.0702618838204781	-3.83111	6.09560127209216e-05	1	1.45402701591829
Com_1589_pos	5-Hydroxytryptophol	C10 H11 N O2	177.079	5.761	195.113	No results	No results	Full match	Organoheterocyclic compounds	Indoles and derivatives	Hydroxyindoles	Hydroxyindoles	95643194.4583387	101728511.8677312	59347332.32775538	133519295.75990184	81084171.86746022	66468581.73479635	113488965.92388396	237344150.4364079	78468143.27952011	95834392.85359636	82448255.77399756	86265368.2170918	0.775083445702777	-0.367576	0.345524850238413	0.638888888888889	0.464073722791131
Com_15917_pos	4-Aminoindole	C8 H8 N2	132.069	5.159	282.171	No results	No results	Full match	Organoheterocyclic compounds	Indoles and derivatives	Indoles	Indoles	9932748.994972372	5431082.701488822	7454827.547492256	9084307.28326684	9470339.310617208	7240734.884626063	7495055.013224675	7819398.765297734	7691072.614176561	8493524.165270828	7015390.489224134	7316380.701358889	1.06072810540428	0.08505490012225018	0.688880311178343	0.583333333333333	0.269089699382958
Com_15994_pos	6-(4-nitrophenyl)-2,3-dihydroimidazo[2,1-b][1,3]thiazole	C11 H9 N3 O2 S	247.046	4.556	248.053	Invalid mass	No results	No results					1207572.6628022832	9252043.335747425	687810.8249584137	1119496.4289492497	532798.6240614038	571373.1678059838	1284179.1461198914	984370.8164659438	992269.790865056	1005889.7704534011	905379.3510928468	1116181.2574621034	2.12635506469496	1.0883825222235615	0.795082084132924	0.555555555555556	0.145093491957924
Com_16013_pos	HLK	C18 H32 N6 O4	792.499	4.579	397.257	Invalid mass	No results	No results					166724.9534875353	155503.99490565367	168903.04718022767	158042.6118268746	146877.0536340823	158718.1312022479	9663113.390081769	558392.1835063361	525543.819529158	1500278.1114347067	745140.1466215043	1180522.6928908566	0.0673654443457996	-3.89185	0.00555621422071503	1	1.25417276240645
Com_1607_pos	KMK	C17 H35 N5 O4 S	194.106	5.258	406.245	Invalid mass	No results	No results					193407458.91677177	226462471.53945225	215191471.43166423	244441309.3479305	204577136.24893	181315523.8795185	54345816.772597	31236991.22102997	31666532.809566524	39856939.997124456	34157295.05117737	76986960.35272439	4.71721469514946	2.2379352639115453	4.99013236060672e-05	1	1.44392531252077
Com_1613_pos	2-Thio-acetyl MAGE	C21 H42 O3 S	396.268	6.078	397.275	Invalid mass	No results	No results	Organic acids and derivatives	Thiocarboxylic acids and derivatives	Thioesters	Thioesters	100453962.88815618	84332383.84599186	68535966.77413604	243902758.9904576	110993557.91069336	75283659.42147993	132936481.86967447	59509608.05139853	88306199.40752429	41507816.97915179	49247083.228220895	93798973.80643696	1.46893023062741	0.5547658742344126	0.192498972939463	0.694444444444444	0.637228976441569
Com_16131_pos	EPK	C16 H28 N4 O6	158.117	5.264	159.124	Invalid mass	No results	No results					6470142.801458184	6604460.356446407	7767746.421780105	7762114.034929471	5264299.555107371	7847862.948769964	6900826.380603799	7084422.984021133	6991522.263386484	7828954.250598986	6429196.947276849	6829410.6476658	0.991733915021376	-0.011975	0.819585650097074	0.5	0.345077462515636
Com_16157_pos	(3R)-8-hydroxy-3-(4-methoxyphenyl)-3,4-dihydro-1H-2-benzopyran-1-one	C16 H14 O4	292.073	4.814	293.08	Invalid mass	No results	No results					10192166.09176242	4166881.242405661	5746167.561665908	7613268.261196048	8051011.120259578	7817895.190244628	9095934.425163455	2733247.9881114108	5272882.266084564	4781809.136446889	4631047.92907991	5745296.077391881	1.35112	0.4341546208416549	0.14284897094176	0.75	0.698318779007166
Com_1619_pos	(6E)-7-(2H-1,3-benzodioxol-5-yl)-1-(piperidin-1-yl)hept-6-en-1-one	C19 H25 N O3	337.164	1.553	338.171	Invalid mass	No results	No results					9761314.815081606	14408866.615799742	38127215.49005908	18706909.21726786	8066214.207510297	28671037.67884077	203445552.66622284	171877889.5311852	181138307.96247324	189743465.24395028	241085970.70181203	179487527.10118988	0.100911643906283	-3.30884	0.000127849140427928	1	1.43378224201506
Com_1623_pos	5,6-Dihydroxyindole-2-Carboxylic Acid	C9 H7 N O4	193.038	5.131	194.045	No results	No results	Full match	None	None	None	None	289489267.93443954	3731821.166392509	52669393.24096808	27729281.16695563	196891175.9128254	7533391.763490183	146429797.07242963	51762812.09538359	57611067.62241285	48298976.87390912	68486503.5524784	101187185.61979464	1.22007850312751	0.28697397764805915	0.38372089537283	0.611111111111111	0.516512891011965
Com_16267_pos	Octadecanamine	C18 H39 N	269.308	8.376	270.315	Full match	No results	No results	Organic nitrogen compounds	Organonitrogen compounds	Amines	Monoalkylamines	1546886.1506550526	1064490.2654282225	599358.9794145223	3273856.5577327963	10433082.268272065	1027176.1217809176	1190795.90983621	524984.0624526188	3546284.272586835	2228044.845675393	489521.74304764246	517614.7086969767	2.11184321483495	1.0785027316772904	0.334234510672917	0.666666666666667	0.499030949224485
Com_1646_pos	Serotonin	C10 H12 N2 O	176.095	5.828	177.102	No results	No results	Full match	Organoheterocyclic compounds	Indoles and derivatives	Tryptamines and derivatives	Serotonins	63599489.13647543	84755373.8121073	107095152.51047917	90612897.45462944	61872583.29712603	153917577.8095626	142965897.92743737	150719094.62220272	165426750.85797957	237726076.24969584	135139044.75735423	120690881.63314472	0.589768128868908	-0.76178	0.0097961980425135	0.888888888888889	1.1004280346946
Com_1651_pos	11-Oxoetiocholanolone	C19 H28 O3	286.189	1.465	287.197	Invalid mass	No results	No results	Lipids and lipid-like molecules	Steroids and steroid derivatives	Androstane steroids	Androgens and derivatives	1710358.252474507	4753521.975376612	12150854.25337708	5048985.545794649	2050940.2823844915	19530845.74056608	248077663.9490739	205121351.49390888	224009020.1859017	184773894.35005796	113652841.02435572	97241329.972456	0.0421721632244616	-4.56757	0.000105368295111622	1	1.40930712954468
Com_1671_pos	P-Coumaroyl Agmatine	C14 H20 N4 O2	276.159	5.078	277.166	No results	No results	Full match	Phenylpropanoids and polyketides	Cinnamic acids and derivatives	Hydroxycinnamic acids and derivatives	Coumaric acids and derivatives	280787748.80390674	141826119.59882897	68165641.37560262	135182459.8273013	233914763.02930343	3.01136e+07	49387865.85947961	28895327.64999742	21199011.92977761	40327281.46354123	19182230.69199224	46847902.65435731	4.32370772628657	2.1122690031631364	0.0103185383995038	0.916666666666667	1.12774047631841
Com_16756_pos	ALK	C15 H30 N4 O4	704.412	4.694	353.213	Invalid mass	No results	No results					245792.73527926803	236791.0807704321	252342.44030164892	241685.5398758833	192420.2118056612	226031.18399674117	8461010.15017126	7252076.599473181	3278276.0661046905	7860854.777235868	1900380.2971158735	1028984.9293006927	0.0468431513694028	-4.41602	0.000486275396925715	1	1.39879830505092
Com_16796_pos	DPK	C15 H26 N4 O6	179.095	1.342	180.102	Invalid mass	No results	No results					6392327.302974385	5275745.929181443	4634322.048139306	6169825.480483465	7687123.618997369	4472081.628381894	5775978.255445418	4796061.754417015	5357420.840159371	4647148.095756158	5711330.86517624	8288700.679579728	1.0015844661843	0.002284092450400527	0.9835715109373	0.472222222222222	0.441584645912747
Com_16857_pos	Oxymorphone	C17 H19 N O4	301.137	2.813	302.144	No results	Invalid mass	No results	Benzenoids	Phenanthrenes and derivatives	Not available	Phenanthrenes and derivatives	796972.6532129609	1198423.3579865706	5846468.700247741	1321189.6270390523	232082.20594484947	6883661.578660567	1006136.7219489448	1258429.4094340273	864506.050655498	845735.114470154	906584.8325533784	361997.2693769474	3.10463268814981	1.6344225920106246	0.308239687380843	0.666666666666667	0.685624502067404
Com_16892_pos	Cys-Gly	C5 H10 N2 O3 S	178.042	1.443	201.032	No results	No results	Full match	Organic acids and derivatives	Carboxylic acids and derivatives	Amino acids, peptides, and analogues	Dipeptides	1759038.3639134003	1629728.4134237615	5318420.70947461	2957774.748828672	787842.6641639288	6831739.35988255	656547.514428224	534964.1735783318	853482.3705625249	385186.6154439448	235645.64966840108	313940.92665576906	6.47182905225388	2.6941735007340917	0.00201007856595706	0.972222222222222	1.26441033459713
Com_16975_pos	5-Phenylvaleric Acid	C11 H14 O2	178.099	5.13	179.107	No results	No results	Full match	Lipids and lipid-like molecules	Fatty Acyls	Fatty acids and conjugates	Medium-chain fatty acids	9008936.380126605	5200738.029027622	4544086.954149244	5256159.702034975	3431022.479668969	4861062.556299279	4101000.06389524	1055348.907839358	1946142.982832653	1068822.5318765678	1086796.549605503	2802309.869632976	2.67834815666239	1.421343507803036	0.0040691721756035	0.972222222222222	1.1872994970527
Com_16999_pos	5'-Deoxy-5'-(Methylthio)Adenosine	C11 H15 N5 O3 S	297.09	5.745	298.097	No results	No results	Full match	Nucleosides, nucleotides, and analogues	5'-deoxyribonucleosides	5'-deoxy-5'-thionucleosides	5'-deoxy-5'-thionucleosides	2694723.549835476	6676783.976534689	2491119.618320175	2725929.500008982	2890976.475022018	2340331.4404636445	8099794.422585746	3969325.480389442	2819735.165900494	4519167.208867809	3131300.6645253925	5177669.055728812	0.715079925037204	-0.483824	0.148763643784993	0.833333333333333	0.69445329082259
Com_1703_pos	Pleuromutilin	C22 H34 O5	400.224	5.778	401.232	Invalid mass	No results	No results					197039046.14619163	238561537.91957211	145698562.24747497	187896430.235528	267974794.2192532	154469366.13316724	78227091.07346478	62152155.5398025	105190775.16683452	109303572.95417066	94633407.07641868	143640411.97083604	2.00901109777088	1.0064855335360092	0.00102609069662852	1	1.25085327438451
Com_17038_pos	1,3,5-trimethyl-N-[4-(2-thienyl)benzyl]-1H-pyrazole-4-sulfonamide	C17 H19 N3 O2 S2	361.095	3.418	362.102	Invalid mass	No results	No results					8942079.378363904	1270762.5953131272	2802789.082493464	1437487.2432153176	3694392.6532663424	5908191.728907866	2245451.1543474654	756509.5832083409	1062668.114749216	633325.1215368912	1207721.8775606684	2235425.9146320783	2.95484608507442	1.5630829838434195	0.0329764398820929	0.888888888888889	0.941992119691789
Com_17103_pos	Neosaxitoxin	C10 H17 N7 O5	315.132	4.001	316.14	Invalid mass	No results	No results	Phenylpropanoids and polyketides	Saxitoxins, gonyautoxins, and derivatives	Not available	Saxitoxins, gonyautoxins, and derivatives	1046718.9532471098	2773665.810578483	6579221.718975831	3211080.0627699774	891735.498525967	3306512.50625237	2960746.5501287254	4269816.367151617	3183314.652789964	5375938.52413834	3612084.437948445	1507201.1935407354	0.851731211793862	-0.23153	0.407905600510358	0.638888888888889	0.576597886537377
Com_17156_pos	(±)8-HEPE	C20 H30 O3	300.209	7.468	301.216	Invalid mass	No results	No match					478234.21831046656	423189.0987663583	401901.3037116993	408405.481997154	540938.4169243632	381506.9834418133	451151.150013229	441268.2806734688	6906888.989282632	433429.0593664152	420700.0232535293	442282.1578049058	0.289606056640239	-1.78784	0.361187182701729	0.694444444444444	0.456863265181595
Com_1728_pos	3,4-Dihydroxyphenylpropionic acid	C9 H10 O4	199.085	1.628	200.092	Invalid mass	No results	No results	Phenylpropanoids and polyketides	Phenylpropanoic acids	Not available	Phenylpropanoic acids	136626709.474268	232401140.3435257	116423326.81402232	136644450.66729513	134172271.47746088	84981207.5382119	38242349.420602456	34682536.94817631	29958363.61947962	28159559.22215532	24211816.920425348	44718476.72973771	4.20681128752256	2.072727101999792	1.21060055064174e-05	1	1.41854043167491
Com_17310_pos	Cytidine 5'-monophosphate (hydrate)	C9 H14 N3 O8 P	323.052	1.426	324.059	Full match	Full match	Full match	Nucleosides, nucleotides, and analogues	Pyrimidine nucleotides	Pyrimidine ribonucleotides	Pyrimidine ribonucleoside monophosphates	6749547.84167509	5404356.623256556	3368919.6410133163	6379553.729976727	4075518.7716478766	3649740.87774695	7638761.591144543	4034289.601269623	3153915.2177896597	4065529.102258965	3528461.7407278623	2149213.9727451154	1.20583764813337	0.2700356783823355	0.304540316481589	0.694444444444444	0.494767029879405
Com_17449_pos	Dl-3,4-Dihydroxymandelic Acid	C8 H8 O5	184.037	5.008	185.045	No results	No results	Full match					7349917.984603386	6591086.523764942	3625149.385415868	6919802.197021759	5968968.583181677	4420140.281776718	1680095.3752386963	1138263.092906545	3252863.732571408	1186855.4681036852	1090208.8564011436	1718081.3453418077	3.46451325882379	1.7926526774974472	0.00015132507042799	1	1.34893964298552
Com_17453_pos	Tetranor-12(S)-HETE	C16 H26 O3	288.169	3.897	289.176	Invalid mass	No results	No results	Lipids and lipid-like molecules	Fatty Acyls	Fatty acids and conjugates	Long-chain fatty acids	294337.63442150975	815619.5256141964	4519517.129219412	1162758.8955499826	367822.6349561896	3796641.14281705	7450108.944845274	2359808.328652214	6261422.70270486	5772142.944359734	4580367.167824829	4.85498e+06	0.350291141690764	-1.51337	0.0223300765132281	0.944444444444444	1.0601234839478
Com_1759_pos	Argininosuccinic acid	C10 H18 N4 O6	290.127	5.225	291.134	Invalid mass	No results	No results	Organic acids and derivatives	Carboxylic acids and derivatives	Amino acids, peptides, and analogues	Aspartic acid and derivatives	121417365.80828398	180670346.87876743	193308523.21196127	181204285.79029936	128437924.27764872	195098351.35441703	156200124.18173268	163597382.5240299	137060172.266192	218694911.73248923	139851161.1597005	5246915.106126327	1.21871197767223	0.28535720923811975	0.355244857823599	0.611111111111111	0.541623648203954
Com_1761_pos	Desthiobiotin	C10 H18 N2 O3	214.132	3.67	215.139	Full match	No results	No results	Organoheterocyclic compounds	Azoles	Imidazoles	Imidazolyl carboxylic acids and derivatives	43426885.77269326	39672083.45684282	39177554.35975828	45348331.90072049	25879966.09831317	39389988.14668804	137943672.58320698	186977743.83198625	186032453.41792652	194096753.80358133	217050213.39635223	150863059.8343489	0.217057452179863	-2.20385	7.43135336835668e-08	1	1.47337523861827
Com_17683_pos	L-Glutathione (reduced)	C10 H17 N3 O6 S	307.084	1.888	308.091	Full match	Full match	Full match	Organic acids and derivatives	Carboxylic acids and derivatives	Amino acids, peptides, and analogues	Peptides	7948138.825416855	1322864.0797211593	3109753.136480486	2458882.945647015	2592837.7510882057	384305.487545745	461251.03611422906	438867.95557672734	364985.6164983265	381060.33008258615	322855.28566229134	368891.1708480407	7.62081157808775	2.929944645662816	0.00922816613274792	0.944444444444444	1.18895079196375
Com_17702_pos	N-[1-(4-methoxy-2-oxo-2H-pyran-6-yl)-2-methylbutyl]acetamide	C13 H19 N O4	253.132	3.911	254.139	Full match	No results	No results					1400355.3723743998	3034940.291861656	5917302.743427828	3739831.264846908	1927978.688772356	5665229.042514105	3998433.9788344502	3233860.926825446	3618847.980760318	3612967.5444686026	5341200.477027086	4692851.044569896	0.885194466664747	-0.175934	0.377502959707751	0.583333333333333	0.535345509103638
Com_17725_pos	4-chloro-5-morpholino-2-quinoxalin-2-ylpyridazin-3(2H)-one	C16 H14 Cl N5 O2	343.082	1.904	344.089	Invalid mass	No results	No results					274402.4327911134	296312.61894116364	287172.2559423062	258921.36415645867	258142.5405834296	249167.40536291111	5835187.052726657	4572060.692427193	4180533.373344056	3242062.988580351	5863213.733567731	7014988.526084583	0.0528890245371314	-4.24089	6.33288743988991e-07	1	1.50080059109292
Com_17726_pos	4-methoxy-9-(2-methylbut-3-en-2-yl)-7H-furo[3,2-g]chromen-7-one	C17 H16 O4	284.101	3.131	285.108	Invalid mass	No results	No results					6376910.555750262	6632623.23031126	5681888.784875638	6606721.083522356	4904932.555237908	5341680.701653051	3504104.641426468	2542591.1521675205	3044701.979754144	3031185.906301325	3570547.545503156	4576162.590388372	1.75362581621356	0.8103409423761341	0.000277219700952562	1	1.33227033126296
Com_17742_pos	1-morpholino-3-(4-nitrophenoxy)propan-2-ol	C13 H18 N2 O5	282.12	3.7	283.127	Invalid mass	No results	No results					4298184.694179802	3198616.1398407826	2450761.404111562	4451568.248257334	2968628.4174669445	2761665.833582169	3905479.822318991	3146729.573730546	2672456.6556566465	3861224.770601884	6535363.965444405	2052081.5835681288	0.907821195707577	-0.13952	0.781872122280694	0.5	0.14066928049732
Com_1789_pos	N-(tert-butyl)-N'-phenethylurea	C13 H20 N2 O	220.158	6.096	221.165	Full match	No results	No results					100330887.65112557	169094832.33568648	191694659.58200088	176653266.53685662	134285225.42365003	152216579.4009106	138573243.95600757	167425409.22030762	137529536.84122282	192093036.29752183	107351991.376386	122451260.22173978	1.06800243639855	0.09491493820158724	0.635824358650886	0.583333333333333	0.373761539108083
Com_1800_pos	Guanine	C5 H5 N5 O	151.05	4.8	152.057	Full match	Full match	Full match	Organoheterocyclic compounds	Imidazopyrimidines	Purines and purine derivatives	Purines and purine derivatives	225036032.86236632	203140852.7359297	145996482.4469309	212654390.6456528	193612059.5263039	184874500.4941044	80272178.24871892	86779045.25683764	87153555.97871168	80913970.03924583	74531003.97620286	92635975.78795522	2.32002274952925	1.2141389521080699	4.02824398541893e-06	1	1.45830872504808
Com_18196_pos	2-Aminobenzenesulfonic acid	C6 H7 N O3 S	173.014	2.874	174.022	No results	No results	Full match	Benzenoids	Benzene and substituted derivatives	Benzenesulfonic acids and derivatives	Benzenesulfonic acids and derivatives	5235284.563657601	2814781.4867503736	2492262.768192871	6098016.407607375	5510512.85098429	3706184.442150774	3038681.767472531	1452201.06394753	3546154.872936029	3718666.318505825	3396436.603143426	4120748.893921212	1.34162770417011	0.423984385499808	0.215442013833327	0.666666666666667	0.638586163480956
Com_18276_pos	ethyl 1-(3-nitro-2-thienyl)piperidine-4-carboxylate	C12 H16 N2 O4 S	306.068	2.316	307.075	Invalid mass	No results	No results					7158771.254580009	1257166.9491315898	1180251.4536277957	2881029.75960097	4768122.55790162	1662569.484972978	387540.1341414388	360358.7556122081	374041.4735162092	392308.02807800286	359923.50365816226	354467.7458955303	8.48405956387196	3.0847547496050356	0.00145742493437237	1	1.34906539031108
Com_18288_pos	AMH	C14 H23 N5 O4 S	714.306	4.629	358.16	Invalid mass	No results	No results					579423.5766922693	909538.7707784584	1427878.4249025548	878090.885667982	101688.90382484865	471165.5011701128	4483127.715366264	3702270.1100960346	5643310.0982602965	5828673.785228753	4381352.701899572	3302652.5847918256	0.159749981364599	-2.64611	0.00218911556962423	1	1.29903822963136
Com_18335_pos	Epigallocatechin gallate	C22 H18 O11	480.069	4.831	481.077	Invalid mass	No results	No results	Phenylpropanoids and polyketides	Flavonoids	Flavans	Catechin gallates	5048214.616778638	5057356.689693335	2020419.0643968843	4661956.142408414	7192100.265161013	2927857.414872328	1061012.2350410814	1011853.0589970133	1020463.3911260212	1071983.705062425	1028032.1975384988	1027117.7681566864	4.3257080669727	2.112936304101928	0.000668835736098638	1	1.38983
Com_18346_pos	Histamine	C5 H9 N3	111.08	1.111	112.087	No results	No results	Full match	Organic nitrogen compounds	Organonitrogen compounds	Amines	2-arylethylamines	196013.61119611844	303020.1943689935	5267319.281444435	339225.900857729	256999.41637327452	544674.864539726	210550.75901325804	189141.0610863052	175038.6117732369	172817.62565320142	240459.4232530652	231705.19753715044	5.66301670186423	2.5015707847541835	0.12760693156087	0.916666666666667	0.833231825034222
Com_18417_pos	5,6-dimethyl-4-oxo-4H-pyran-2-carboxylic acid	C8 H8 O4	168.04	3.418	169.047	Invalid mass	No results	No results					2387350.0430622334	2497294.2985177017	5207330.558112998	3743748.220171718	2529064.9321527868	4884017.377387272	1980891.7937113647	2224122.353372674	2947147.722388937	3103173.8337524943	2767299.7122093444	2280273.7004667907	1.38854679646007	0.47357579932687616	0.116259647718332	0.75	0.838850299648497
Com_1849_pos	Palmitoleic acid	C16 H30 O2	254.225	7.032	255.232	Full match	No results	Full match	Lipids and lipid-like molecules	Fatty Acyls	Fatty acids and conjugates	Long-chain fatty acids	171186241.11326987	126641578.2205104	111273998.74175864	91967369.41731796	251234279.86916423	126881822.8631344	127813484.64520603	79206948.46094923	75631957.34460197	9265295.368870728	122693005.32534131	100075373.84690323	1.70819719053213	0.7724745261188098	0.13666985398443	0.805555555555556	0.720575595517728
Com_185_pos	(±)11(12)-DiHET	C20 H34 O4	355.272	6.113	356.279	Invalid mass	No results	No results					159554359.9481796	16440428.387203917	1472108073.6114085	955882824.2419318	1240867035.2709365	1414478562.7717426	1181989374.340124	1124477619.0502756	1313619699.725894	638598458.2807809	992659053.1686604	1953334149.1472435	0.729988352848671	-0.454055	0.250587715980652	0.583333333333333	0.570051239076204
Com_18526_pos	3-phenyl-5-(1,2,3-thiadiazol-4-yl)-1,2,4-oxadiazole	C10 H6 N4 O S	252.009	5.499	253.016	Invalid mass	No results	No results					5504687.177706942	5904231.471343508	4666929.930314685	5451331.799374937	5261195.258108112	4291978.291451873	3642412.1756843487	4534948.726492591	4271665.281947082	4639115.680561784	4078167.331096645	4272810.798399792	1.22175428770366	0.2889541676809262	0.00887821431099776	0.944444444444444	1.0920157032701
Com_18535_pos	5-[(Benzoyloxy)methyl]-4,5,6-trihydroxy-2-cyclohexen-1-yl benzoate	C21 H20 O7	406.098	2.357	407.106	Invalid mass	No results	No results	Benzenoids	Benzene and substituted derivatives	Benzoic acids and derivatives	Benzoic acid esters	615661.008338669	1953638.303447788	967549.0109811148	1579650.959625519	513916.671061374	423798.4694355174	3841703.4155091294	5375492.243665532	3308676.9837987483	5726995.663813185	5074099.569902747	3860349.325278873	0.222685246135713	-2.16692	0.000760749042146304	1	1.3399174199258
Com_18551_pos	1-(5H-dibenzo[b,f]azepin-5-yl)ethan-1-one	C16 H13 N O	257.083	3.656	258.091	Invalid mass	No results	No results					3640786.368603232	2685030.4469935554	4640988.54629737	4661963.601753958	1970849.0873830165	5088547.025659168	3846617.509538659	1914362.0510866812	2886643.6174616283	2725113.7520168754	2105471.7059132517	2391972.055700319	1.4296097516099	0.5156213803924756	0.106342344109811	0.75	0.781473432572655
Com_18590_pos	4-heptyl-3-methyl-1H-pyrazol-5-ol	C11 H20 N2 O	196.158	1.243	197.165	Full match	No results	No results					1136799.021330604	1643782.756786982	5054982.315451034	2035613.473543674	666800.045919774	1802399.774800702	1505962.7410484543	2954092.040649692	3456995.9639409063	4264354.009402501	3893261.6232263874	3296430.741072418	0.637051030811877	-0.650519	0.093566527570747	0.75	0.822066683146199
Com_1864_pos	Valylproline	C10 H18 N2 O3	214.132	5.76	215.139	Full match	No results	No results	Organic acids and derivatives	Carboxylic acids and derivatives	Amino acids, peptides, and analogues	Dipeptides	4615086.564218954	5670349.2999017695	4261116.988060402	6368314.811697239	4441806.876800105	3938191.7567791594	171005396.7162139	159564738.76536712	155830316.00747165	180337858.62949324	202550747.8617589	217917566.83527532	0.0269450770707241	-5.21383	1.8190324691958e-11	1	1.50800851932511
Com_18726_pos	Benzamidine	C7 H8 N2	120.069	5.109	279.101	No results	No results	Full match	Benzenoids	Benzene and substituted derivatives	Not available	Benzene and substituted derivatives	1772002.2046026404	1488392.4939242285	1752597.5543989923	1482926.453690361	1517256.4648361036	1708873.440436353	2556986.8606863385	3861850.8284160416	4316107.936861694	5551627.897681778	2472178.056714624	3.90289e+06	0.42900907816892	-1.22092	0.00103498998664232	1	1.34097558566353
Com_18876_pos	Celestolide	C17 H24 O	266.163	3.261	267.171	Invalid mass	No results	No results					1370779.9175843871	1173779.4191724877	2805661.9312013625	2054557.61234171	1570848.1596996791	2886927.4096462405	4200201.478833102	4286868.336368286	3986797.009053386	3237829.5367513173	5362543.433732906	3633671.279288976	0.480111589122374	-1.05856	0.0024189661412879	1	1.25002700164283
Com_18877_pos	TMK	C15 H30 N4 O5 S	360.179	4.771	361.187	Invalid mass	No results	No results					4076181.380443407	5562086.680777117	1768471.6632579209	2676500.614714225	2588465.844186502	1396742.880571987	1383991.0670131256	2365986.314389727	2541183.039055883	1014878.0757981868	1290636.5755625544	1492398.0280091867	1.79089286846955	0.8406790376307093	0.0682749517212233	0.861111111111111	0.832055495845641
Com_18885_pos	Azelaic acid	C9 H16 O4	188.105	5.07	415.172	No results	No results	Full match	Lipids and lipid-like molecules	Fatty Acyls	Fatty acids and conjugates	Medium-chain fatty acids	3341144.4595810915	3248864.7492530826	3853241.272518255	3228167.9935070826	2962348.2540030973	4808745.508822476	2446324.307406724	2588716.2692559385	2545601.6941650487	2570821.764529107	2585676.3769700285	2103584.1800079723	1.44484267626394	0.5309124113900624	0.0025652277477171	1	1.27936
Com_1898_pos	L-5-Hydroxytryptophan	C11 H12 N2 O3	220.085	2.715	221.092	Full match	No results	Full match	Organoheterocyclic compounds	Indoles and derivatives	Tryptamines and derivatives	Serotonins	31590191.427293465	24089383.799399942	25305453.17504837	24628912.30412983	15820228.482197084	22663365.560767323	187302636.1532572	114911186.75513224	116007515.16816948	102132545.68490842	97362723.58329418	213525986.6712092	0.173351962214376	-2.52822	2.70525269935219e-06	1	1.45122352962947
Com_18998_pos	3,3-dimethyl-2-morpholino-2,3-dihydrobenzo[b]furan-5-ol	C14 H19 N O3	249.137	3.433	250.144	Full match	No results	No results					1659891.9121025372	1224408.0994764988	1922978.2560708933	2411344.034920899	1732459.667250248	2960973.0697612264	3151332.173335011	4654521.041100075	4104659.209051673	3225729.877569642	5254313.742868336	4625375.053991826	0.476178759565515	-1.07042	0.000761495330275249	1	1.27631686979946
Com_19113_pos	DGDG O-8:0_7:0	C30 H56 O14	657.395	8.144	658.402	No results	Invalid mass	No results					592039.7574059367	516092.49886948726	437570.4158685944	467941.090082338	588371.8258905206	455201.48458309175	3412313.5888975123	2761479.6583873224	3728152.271422238	1211740.8839939372	5153353.570309593	2302543.345345018	0.164635739008639	-2.60265	0.000231729562255976	1	1.41209395622184
Com_19125_pos	FNH	C19 H24 N6 O5	416.181	3.409	417.188	Full match	No results	No results					186390.1096627255	156891.88687328197	176839.45168277598	163664.67800508268	179597.1898002169	177542.5168419083	4137094.104491703	3669536.816144074	4891233.18751263	3582933.889505494	3633141.876778687	3850730.739645056	0.0438013995552445	-4.51288	2.17688414939368e-11	1	1.5095351296091
Com_19143_pos	MAG (18:2)	C21 H38 O4	354.279	7.932	355.286	No results	No results	Full match	Lipids and lipid-like molecules	Fatty Acyls	Lineolic acids and derivatives	Lineolic acids and derivatives	5327840.938677186	3197820.582887958	2824876.610880852	4803540.71242013	6271789.222121083	2976385.879494567	3727925.643079781	3089940.845627527	4472679.763204879	4776647.928027777	2110018.1955513963	2837550.654628456	1.20878136527514	0.27355332501944324	0.359937396480436	0.666666666666667	0.501550025968857
Com_1916_pos	s7p	C7 H15 O10 P	290.04	1.315	291.048	No results	No results	Full match	Organic oxygen compounds	Organooxygen compounds	Carbohydrates and carbohydrate conjugates	C-glycosyl compounds	11950686.35475672	2833778.515371291	8844861.981827479	32618449.99687749	44834685.13207256	178399155.49166468	62088911.423376136	19017760.084265824	24675876.44342709	4770352.076014514	1388117.8671930465	7725911.013146656	2.33549586359639	1.2237288899789283	0.431919369455464	0.638888888888889	0.378801621966002
Com_1917_pos	SM 8:1;2O/31:0	C44 H89 N2 O6 P	772.647	11.405	773.654	No results	Full match	No results					3645041.54604045	3411986.905103205	2807732.7378665856	3342703.320558469	3935688.931877847	2905124.404009303	215460606.52665785	3183635.9028161704	3122579.104121393	3478734.872684968	3505970.9368746453	3459860.3288737773	0.0863363250460898	-3.53389	0.358881014874134	0.611111111111111	0.474614053182768
Com_19253_pos	ADP-ribose	C15 H23 N5 O14 P2	559.073	1.442	560.08	No results	No results	Full match	Nucleosides, nucleotides, and analogues	Purine nucleotides	Purine ribonucleotides	Purine ribonucleoside diphosphates	266191.1409360708	229335.7659721139	257514.2485323948	257315.5915336883	231176.8770961325	266010.4664612809	5445805.632854945	2511427.502607644	2122871.537342323	1579828.414743404	3597260.8499660064	1863086.6433264108	0.08805603876719	-3.50543	4.64212515206839e-05	1	1.46371294931131
Com_19297_pos	L-Histidinol	C6 H11 N3 O	141.09	1.117	142.098	No results	No results	Full match	Organic nitrogen compounds	Organonitrogen compounds	Amines	Aralkylamines	5086129.23191871	4510956.117632926	2250213.868586937	5017685.970218708	4149778.927615264	3859682.097036196	1307765.864216833	864152.4871986564	966352.503871366	907661.413328538	754072.4123669027	1235367.0123807548	4.12144396017276	2.043149878479176	6.70638449433128e-06	1	1.42760037995721
Com_19311_pos	L-cysteine	C3 H7 N O2 S	121.02	1.329	122.027	No results	No results	Full match	Organic acids and derivatives	Carboxylic acids and derivatives	Amino acids, peptides, and analogues	Cysteine and derivatives	2687305.7336506504	4134387.683048392	3153150.990196898	2803747.461736052	2656487.127216483	1340796.4089155046	1902580.5565539785	3252148.260130341	3592220.771463936	4575000.026172622	4969378.795751485	4090511.432896839	0.749530669617125	-0.415941	0.184001363236246	0.777777777777778	0.626784670405304
Com_1942_pos	Adipamide	C6 H12 N2 O2	144.09	5.51	145.097	No results	No results	Full match	Lipids and lipid-like molecules	Fatty Acyls	Fatty amides	Fatty amides	167187833.36427468	153708426.97969493	99660162.18022296	197534787.092594	148850405.07712102	102460275.30758388	80316853.75021356	72254485.10689265	71265353.30817585	92571164.6163181	55550752.08740701	84930176.81843157	1.90287421630054	0.9281801998058488	0.00128980410893523	1	1.25506065152415
Com_1943_pos	Phe-Phe	C18 H20 N2 O3	312.146	5.449	313.154	No results	No results	Full match	Organic acids and derivatives	Carboxylic acids and derivatives	Amino acids, peptides, and analogues	Dipeptides	167600993.68901783	140204253.0552754	94766189.2800299	168571434.2267302	239805127.6594084	113950136.34258445	39376148.60844503	50441595.88467605	54087695.89588189	62629326.39239903	54435939.07328029	69136695.21576044	2.80180974814218	1.4863589954794858	0.000186484861560214	1	1.3560884986149
Com_19469_pos	4-(cyclohexylmethyl)-6-(2-thienyl)-2,3-dihydropyridazin-3-one hydrate	C15 H18 N2 O S	312.064	3.861	157.039	Invalid mass	No results	No results					2340927.283122685	3016633.2906222083	2921917.854559002	3319153.226260187	3625237.9008032526	4329426.543246016	3148434.1425061687	2764912.3340545297	3511997.986335095	2080379.5886623785	2640432.659938013	2828263.617335213	1.15192717747196	0.20404951537322716	0.251923271094248	0.722222222222222	0.551775922991485
Com_19502_pos	N-METHYL (-)EPHEDRINE	C11 H17 N O	179.131	6.143	180.138	No results	No results	Full match					3938176.284284364	3586343.804352192	3739193.707984944	3311039.435727953	3813613.2428733	2973460.3932929514	3521240.485656948	3646941.358871001	3150544.796319528	4831457.913892125	3939966.5472418224	3690445.7588938894	0.937720244951251	-0.0927705	0.427641232360455	0.583333333333333	0.402632604388349
Com_19545_pos	PLK	C17 H32 N4 O4	339.216	1.444	357.25	Invalid mass	No results	No results					182037.49658626737	156833.5766864766	4281549.282377751	1129530.985451257	252657.99388720677	1088742.0011530267	1291821.8644392877	735698.3475620028	664153.5436351802	615050.4827346219	1062076.1525577966	1499610.6365072744	1.20839377183846	0.2730906534279759	0.436049077941786	0.611111111111111	0.462663896063054
Com_1956_pos	5-(hydroxymethyl)-4-methoxy-2,5-dihydrofuran-2-one	C6 H8 O4	144.042	7.025	127.039	Full match	No results	Full match					166960802.17683297	182552726.31691876	138769535.0447028	153732634.83007565	220591422.6966065	174995662.7342913	120532130.5695518	114513822.45671976	88640068.60495313	47781797.907578856	162642067.20440462	176511516.680792	1.46013443839424	0.5461012079241238	0.0688239869184662	0.833333333333333	0.867373937319504
Com_19569_pos	4-butyl-4-(hydroxymethyl)-1,2-diphenylpyrazolidine-3,5-dione	C20 H22 N2 O3	360.145	4.114	361.152	Invalid mass	No results	No results					301237.3039420733	277138.7404433742	263728.1892115693	269236.99296056974	299026.1966186458	255175.74898940904	2406772.633508041	4602153.772161466	3451013.583954141	2984541.489045369	2254491.958310394	1918331.142252668	0.094540181483213	-3.40293	5.47232082065467e-06	1	1.48627519754099
Com_19574_pos	Catharanthine	C21 H24 N2 O2	336.18	3.917	337.187	Invalid mass	No results	No results	Alkaloids and derivatives	Ibogan-type alkaloids	Not available	Ibogan-type alkaloids	1253074.3363171958	1869054.5250595517	4257351.810189122	2121458.4385894127	1187761.940827182	3108512.129909909	2701663.0925685987	3249425.6926184557	2579214.173436471	2904239.642659076	2461761.545114964	2462973.204227173	0.843387692816729	-0.245732	0.246503474919083	0.694444444444444	0.685177510499751
Com_1963_pos	Loxoprofen	C15 H18 O3	246.122	5.603	247.129	No results	Invalid mass	No results	Phenylpropanoids and polyketides	Phenylpropanoic acids	Not available	Phenylpropanoic acids	72284741.53265327	33849857.95052494	14863842.575909551	48244206.963931695	237553427.5965195	47934366.14952477	2751204.997135508	3263558.209771892	3509734.2713845293	3641049.4270300367	3234246.89692061	2901690.6556845168	23.5593507722307	4.558227878088479	0.000621249706967852	1	1.38769855810358
Com_1966_pos	2-(3,4-dimethoxyphenyl)ethanamine	C10 H15 N O2	181.11	5.822	182.118	No results	No results	Full match					181598355.4106596	163037539.82711202	165364420.63039842	133259100.03544304	168943381.40861386	173984337.5045718	176685588.06041703	157992586.9343702	141558758.74357298	145695047.74918848	154252112.44333106	161439244.03381068	1.05179456918972	0.07285295277428862	0.396144799751201	0.722222222222222	0.411135747612727
Com_1970_pos	3-(3-Methoxyphenyl)propionic acid	C10 H12 O3	180.079	5.65	163.075	No results	No results	Full match					232977187.3461396	174978476.3784656	115277099.02593842	169327722.43676212	174314181.79646686	125819431.19113092	167245204.7496557	108746941.25002544	113781729.60639468	134462833.83955565	107522298.5046812	158612934.11687472	1.25598347479106	0.3288174825465577	0.130546910631665	0.833333333333333	0.776915576293706
Com_1974_pos	Ecdysterone	C27 H44 O7	480.317	6.251	481.324	Invalid mass	No results	No results	Lipids and lipid-like molecules	Steroids and steroid derivatives	Bile acids, alcohols and derivatives	Hydroxy bile acids, alcohols and derivatives	29430119.115062065	55676899.726287335	38417264.911178656	161111881.1384324	74796236.37490818	134486282.84691864	202838234.42676687	132797245.49196447	167460816.81034577	166385213.72206253	144059824.2822725	187554971.7239916	0.493377790854734	-1.01924	0.0230839000855268	0.916666666666667	1.06033263506719
Com_19826_pos	(3S,9aS)-3-benzyl-octahydro-1H-pyrido[1,2-a]pyrazin-1-one	C15 H20 N2 O	266.138	3.265	267.145	Invalid mass	No results	No results					2078404.7405836491	1756538.0119000387	3709094.53090105	2411231.9392690314	1292353.6297918004	2951592.032957544	2221524.4549638364	3578981.927152321	4328111.793690277	3551841.3944414924	3836375.654280272	3337258.4961405466	0.680883814736581	-0.554519	0.0453740095772242	0.833333333333333	0.932771303879091
Com_19830_pos	Pantetheine	C11 H22 N2 O4 S	278.13	6.316	279.138	No results	No results	Full match	Organic acids and derivatives	Carboxylic acids and derivatives	Amino acids, peptides, and analogues	Beta amino acids and derivatives	3525791.780052683	2960033.6905571525	1963737.2446775923	3113485.6384581435	3468158.859684717	2020648.0588562635	3524695.927725186	4409935.987577861	2079474.704521793	3855110.999839431	3367854.834451952	2309260.4907767945	0.872381296295364	-0.196969	0.444170021660092	0.694444444444444	0.421785270291309
Com_19940_pos	Sinomenine	C19 H23 N O4	329.159	3.297	330.166	Invalid mass	No results	No results	Alkaloids and derivatives	Morphinans	Not available	Morphinans	5325023.690934164	2673433.322698351	2162199.8127448354	2450003.899813644	2278762.575998674	1967849.887821209	2808772.981167903	1309135.898261487	1207274.7761209349	923759.1300265492	1189909.660598092	2377302.7877689176	1.71729896158519	0.7801412174711788	0.0363391922435844	0.777777777777778	0.935111401454809
Com_20012_pos	N-Carbamyl-L-glutamicacid	C6 H10 N2 O5	190.059	1.456	191.066	No results	No results	Full match	Benzenoids	Benzene and substituted derivatives	Diphenylmethanes	Diphenylmethanes	5265460.051968051	775573.5827068157	1248323.8310220658	1784371.03027437	952563.9632636592	1280346.8049226373	1723276.3835269634	497208.2117034945	832667.5640023332	781022.8032296024	857875.4872464787	1140711.2248171102	1.93847098425747	0.9549191404637913	0.159501993019634	0.75	0.676480337319892
Com_20063_pos	TLK	C16 H32 N4 O5	360.24	5.84	361.247	Invalid mass	No results	No results					3274877.468733343	3948114.951245677	3330912.752214531	4363944.337884771	3475654.59378582	3076186.1620505936	2229834.655679605	3065076.7064933563	3018299.8232842847	3545537.039649077	2737095.2383937053	3436970.9071455663	1.19059010006024	0.25167680329742853	0.0695037203929351	0.805555555555556	0.819827424084426
Com_20133_pos	Nonadecanoic acid	C19 H38 O2	298.287	10.722	299.295	No results	No results	Full match	Lipids and lipid-like molecules	Fatty Acyls	Fatty acids and conjugates	Long-chain fatty acids	686228.766107979	398989.7144340376	403081.52810627065	1609316.0927110328	5238411.368508759	584805.2116239022	440625.8199763207	395809.077166445	1810818.305741072	987843.8220840488	379749.96932998265	382089.6095771627	2.02887452905962	1.02067964779511	0.419072591391166	0.694444444444444	0.427440024897557
Com_2014_pos	L-Phenylalanine	C9 H11 N O2	182.106	5.559	183.113	Invalid mass	Invalid mass	No results	Organic acids and derivatives	Carboxylic acids and derivatives	Amino acids, peptides, and analogues	Phenylalanine and derivatives	228277029.90274155	150745957.92857525	97128835.79549608	159714867.5022821	159260050.47674617	96298450.60884008	108382538.14207456	54857581.80812842	63089121.604502335	89790082.0558286	48129635.52038236	74329493.54185332	2.03253303207713	1.023278798709467	0.0034337198527937	0.944444444444444	1.17144141017898
Com_20341_pos	Oleanolic acid	C30 H48 O3	478.34	7.206	479.347	Invalid mass	No results	No results	Lipids and lipid-like molecules	Prenol lipids	Triterpenoids	Triterpenoids	1326122.1061875154	3350728.408271573	2660366.52961236	1103032.6374245137	817401.210858214	3704049.0746898535	1696922.353792188	1378095.0735001154	807351.992324485	887665.0295993976	1781634.2115568938	3023475.717932452	1.35368193464215	0.4368887985738038	0.470310312853881	0.611111111111111	0.394572591456769
Com_20363_pos	1-Methylguanosine	C11 H15 N5 O5	297.106	2.175	298.114	No results	No results	Full match	Nucleosides, nucleotides, and analogues	Purine nucleosides	Not available	Purine nucleosides	3644833.933990125	2702075.4515306987	1736400.9981552756	2953036.355355913	2754556.9054310545	1815754.0962165636	4452662.544187036	2311921.3359056967	2190030.87740661	3616678.581176784	3339261.9177349946	3469730.226632281	0.805285234540767	-0.312428	0.207854105608249	0.694444444444444	0.703993057402706
Com_20367_pos	7-Methylxanthine	C6 H6 N4 O2	166.048	4.786	371.059	No results	No results	Full match	Organoheterocyclic compounds	Imidazopyrimidines	Purines and purine derivatives	Xanthines	4933414.128392547	3576754.074202968	2976283.79165529	3172757.361555088	3312603.670943933	2725875.495058257	3628385.315484782	3252164.7867461224	2329968.125554124	1835192.6684096504	2813200.058556833	2756386.424729621	1.24570075690421	0.31695754478263205	0.115972924130344	0.722222222222222	0.735404910049548
Com_204_pos	Royal jelly acid	C10 H18 O3	186.125	6.25	390.285	No results	No results	Full match	Organic acids and derivatives	Hydroxy acids and derivatives	Medium-chain hydroxy acids and derivatives	Medium-chain hydroxy acids and derivatives	1524801429.927768	1655848215.7891731	1391155902.7444506	1289943180.1805513	1478744507.7412536	1152529505.6174684	1477331551.8736598	1400314773.8609722	1497258569.3416877	1247725642.528195	1527994460.6190054	1540316149.21717	0.977227045715491	-0.0332343	0.669762244567874	0.583333333333333	0.325478689605637
Com_2045_pos	Leucylproline	C11 H20 N2 O3	228.147	5.507	229.155	Full match	No results	Full match	Organic acids and derivatives	Carboxylic acids and derivatives	Amino acids, peptides, and analogues	Dipeptides	64234014.84871624	61677601.56115515	27192256.166989204	48701711.85893658	10403503.655968357	26366175.062845062	148305677.27617437	127939499.53362526	117749745.29051375	140084381.54135174	149103828.56031585	200024961.4937476	0.270123501876333	-1.88831	0.00286874355500402	1	1.27942463532592
Com_20497_pos	Punicic Acid	C18 H30 O2	278.224	6.225	279.232	No results	No results	Full match	Lipids and lipid-like molecules	Fatty Acyls	Lineolic acids and derivatives	Lineolic acids and derivatives	2808051.896426571	1701286.2675490957	1457022.682554825	2495526.994779237	4896945.547728998	1907096.2249854056	1914033.379528473	1536019.6248726612	1516805.2118327129	1379259.8606077149	1582307.2162609056	1812838.3966159436	1.56714057849977	0.6481346008747565	0.0941803521087572	0.777777777777778	0.854351043281363
Com_20540_pos	Adenylocuccinic Acid	C14 H18 N5 O11 P	463.075	4.682	464.083	No results	No results	Full match	Nucleosides, nucleotides, and analogues	Purine nucleotides	Purine ribonucleotides	Purine ribonucleoside monophosphates	2576042.1868296014	2595917.6800256846	3508391.7624922725	3394004.515249134	1664556.3475717737	3558641.521999484	2908676.625470604	1440244.6714681902	2698653.310080152	2468623.732531648	1838595.840777867	1637796.4199453725	1.33133988027017	0.412878926610116	0.117525773327847	0.777777777777778	0.765218076867638
Com_20604_pos	2-hydroxy-6-[(8Z,11Z)-pentadeca-8,11,14-trien-1-yl]benzoic acid	C22 H30 O3	324.208	8.165	325.216	Invalid mass	No results	No results					1726695.9391603055	2202464.500280638	1709938.8592989051	1347103.0514047772	2137519.4464952773	1235519.284809916	1760453.4352196143	2125892.641974897	1547613.8501542662	1510899.011499816	1821129.0557905852	4187486.8200179194	0.799726809190084	-0.322421	0.359419190290641	0.611111111111111	0.523135923539904
Com_2062_pos	KNK	C16 H32 N6 O5	740.455	4.912	371.235	Invalid mass	No results	No results					1357835.4069124542	1224605.555443921	1201131.1496190557	1354488.475467467	1194755.11112703	1186634.410294064	201936485.8749144	110408308.66463795	97123622.90331082	110104345.4396671	79779199.52074401	158614076.6046717	0.00992056335229178	-6.65536	2.39116550873719e-07	1	1.50610601052013
Com_20712_pos	3-bromo-2,6-dimethoxybenzoic acid	C9 H9 Br O4	259.962	0.523	260.97	Invalid mass	No results	No results					2819624.2595452145	2449564.3099396643	3442581.874968908	3555544.5155739174	3050591.3202421563	2123513.196972478	2256381.3245929126	2692869.2486212747	2025545.2878369244	2302059.395355337	2359337.154398052	2571071.3387606223	1.22764100003255	0.29588873400263954	0.069831238405722	0.805555555555556	0.839257003836335
Com_20750_pos	5,7-dihydroxy-2-phenyl-4H-chromen-4-one	C15 H10 O4	254.058	1.1	255.065	Full match	No results	No results					779595.1959430886	464332.0655605931	595102.6614824656	3831611.180786589	1216205.4320444895	543352.4809625219	1590420.4325326623	548213.9111417198	621871.1334164452	1029289.6009641008	500140.4015622488	588722.4662613206	1.52300060779149	0.6069165175688647	0.603053265367085	0.527777777777778	0.295262118365296
Com_20771_pos	S-(5-Adenosy)-L-Homocysteine	C14 H20 N6 O5 S	384.122	2.472	193.068	No results	No results	Full match	Nucleosides, nucleotides, and analogues	5'-deoxyribonucleosides	5'-deoxy-5'-thionucleosides	5'-deoxy-5'-thionucleosides	894768.9481779644	3922995.672104341	2014265.428236363	2839718.8567783623	215849.33352145177	393325.105091733	324715.07829352166	255558.60994912183	274483.54445620795	312865.80324509967	270819.33652338915	267713.9861474398	6.02578028209398	2.5911480689309716	0.0347963242759834	0.833333333333333	1.02448770629071
Com_2078_pos	3-(propan-2-yl)-octahydropyrrolo[1,2-a]pyrazine-1,4-dione	C10 H16 N2 O2	196.121	0.649	197.129	Full match	No results	No results					222092906.03769127	90739315.860716	91011147.18101202	112499093.71118636	138946296.14234826	82306250.15232943	42481496.23671404	64173268.81317783	69973544.55843762	82790707.8789285	54131145.814094365	51537549.7587519	2.02032274080901	1.0145857778147978	0.00560288452624384	0.972222222222222	1.14506146409131
Com_20800_pos	(3-Methoxy-4-hydroxyphenyl)ethylene glycol sulfate	C9 H12 O7 S	264.03	5.552	265.038	No results	No results	Full match					2325720.7482895334	2569884.3709737523	3380740.6636388144	2849350.662590485	2312425.8650087826	3033841.711937401	2412380.987961485	3026496.837009896	3064437.737265645	3215428.276208998	2912150.90583097	2647398.202458251	0.953332836363973	-0.0689481	0.503353590279325	0.638888888888889	0.517256057924292
Com_20832_pos	MGMG (18:2)	C27 H48 O9	516.331	6.795	517.339	No results	No results	Full match					603734.3834739721	649225.4684630517	1155042.831318745	555577.1900093156	662245.1839589272	3353760.6576390904	620054.2166453821	3198813.881094402	1756485.9822121288	653893.4687146755	667315.0777552498	737925.0158169605	0.914217959597921	-0.12939	0.775491690889377	0.638888888888889	0.322822393391634
Com_2092_pos	2-(acetylamino)-3-(1H-indol-3-yl)propanoic acid	C13 H14 N2 O3	246.1	5.513	247.108	Full match	Full match	Full match					220096730.51686612	115864821.55833788	76385147.31838986	99488141.89741153	216562511.5457112	98918062.94829214	60429007.4228535	33834344.75541457	34648374.783771425	39871136.94318773	34195760.04686299	49773402.44525164	3.27322960601874	1.71071480612427	0.00065918523231576	1	1.31280491331816
Com_20930_pos	NPH	C15 H22 N6 O5	348.154	2.02	349.161	Invalid mass	No results	No results					346699.25319446664	3415148.144038435	3284962.9933935143	1088354.0715974325	313309.8647185856	2922962.661921589	1688292.9685378384	1548487.643754437	1842934.966424248	1275340.366542627	806508.7826371086	1525614.4463614293	1.30899072768759	0.3884548779046128	0.821800983702669	0.527777777777778	0.357432787143486
Com_20961_pos	D-Ala-D-Ala	C6 H12 N2 O3	160.085	1.547	161.092	No results	No results	Full match	Organic acids and derivatives	Carboxylic acids and derivatives	Amino acids, peptides, and analogues	Dipeptides	1184686.121084513	1583288.772120633	935480.6406336965	1072187.8704136892	743300.5717185178	1105968.522276688	3483764.4792939043	686750.3166265617	3457054.9667943465	2354983.554160102	3090363.9500463344	3192051.2548938426	0.407311731920181	-1.29579	0.02462873005221	0.833333333333333	1.03038931972795
Com_2097_pos	Isophorone	C9 H14 O	138.105	5.973	139.112	No results	No results	Full match	Organic oxygen compounds	Organooxygen compounds	Carbonyl compounds	Cyclohexenones	172049962.74217248	100163630.55330113	76343841.45602168	79840227.79335874	74705992.04695866	67479518.72618447	177673839.03053418	123751213.07948564	173645862.77333054	129271983.31559448	44576195.3331672	173156411.3817614	0.694076359053875	-0.526834	0.235394610957259	0.777777777777778	0.615331849470183
Com_20983_pos	Scopoletin	C10 H8 O4	192.044	1.156	193.051	Invalid mass	No results	No results	Phenylpropanoids and polyketides	Coumarins and derivatives	Hydroxycoumarins	7-hydroxycoumarins	1239954.981168992	1354162.8627081916	1085884.0714141857	1865425.0208909544	1149761.264148866	3248789.0937960986	2057620.3246299808	813047.7822308637	1087505.519336137	410912.6547177463	234459.16377233644	374802.1545392701	1.99744535630108	0.9981560361836586	0.0460455678915027	0.833333333333333	0.915856122213173
Com_2109_pos	Nicotinamide	C6 H6 N2 O	122.048	5.546	123.055	Full match	Invalid mass	Full match	Organoheterocyclic compounds	Pyridines and derivatives	Pyridinecarboxylic acids and derivatives	Nicotinamides	161407973.6529732	172665456.1416227	81849825.24116383	60378595.09826735	222370816.25635427	84858763.12121274	69759727.2962186	59294034.96182311	59429799.07076023	65501834.42087929	55858387.49480662	78701372.42735066	2.01657752792408	1.011908871650824	0.035130426975335	0.916666666666667	1.00889778413238
Com_21184_pos	Gatifloxacin	C19 H22 F N3 O4	357.154	1.257	358.161	Invalid mass	No results	No results	Organoheterocyclic compounds	Quinolines and derivatives	Quinoline carboxylic acids	Quinoline carboxylic acids	2314747.3022958566	3613989.974192734	1022937.7087714892	2035944.341488764	2033881.436929522	231377.31620931305	143996.7458463695	115699.87396385112	117056.4905772456	129994.53257018686	117702.00672708944	206696.23395943997	13.5389927344031	3.7590485050605045	0.00160734857041269	1	1.32258048171306
Com_2120_pos	α-Lapachone	C15 H14 O3	264.075	2.896	265.082	Invalid mass	No results	No results	Organoheterocyclic compounds	Naphthopyrans	Naphthopyranones	Naphthopyranones	117575260.08154576	115380612.90965109	133839548.54854788	182333807.3933061	135592012.36368182	139298109.37967148	110300290.91404644	76918145.85819428	130591279.56130502	96092697.27378929	87585777.64760402	85315940.09970997	1.40424940222241	0.4897991887730672	0.00793734266652041	0.944444444444444	1.09682940140639
Com_2122_pos	(6E,10E)-3,7,11,15-tetramethylhexadeca-1,6,10,14-tetraene-3,5,9-triol	C20 H34 O3	339.277	6.752	340.285	Invalid mass	No results	No match					163934451.24818873	166118417.10104764	161969123.96369407	88046613.29944345	191288945.3024777	149032217.60464606	140339775.2418066	115936728.92483358	144370698.1548258	63827253.314102136	154428869.69711396	171941117.54870963	1.16380632980882	0.21885099787566667	0.375076995249998	0.722222222222222	0.432709924258622
Com_21269_pos	N-(9-oxodecyl)acetamide	C12 H23 N O2	235.158	8.091	236.165	Invalid mass	No results	No results					416572.1384784609	374232.413451314	1066587.634032827	359737.3177187437	416086.2763926152	654124.4469034823	379939.7114930698	2746420.866861866	1375519.2754476708	3449509.5654437444	1922536.038003808	371296.0400789612	0.320865705815578	-1.63996	0.0783520710247898	0.75	0.855396693772252
Com_2128_pos	Prostaglandin J2	C20 H30 O4	351.241	6.895	352.248	Invalid mass	No results	No results	Lipids and lipid-like molecules	Fatty Acyls	Eicosanoids	Prostaglandins and related compounds	158760975.5116066	155325376.0276138	160157778.81622386	116175556.84647568	118662967.70312355	161632672.6009213	146373137.8182182	119024476.39208172	136364195.63022405	88147437.43350822	127180970.8400818	161810111.98192045	1.11787772306967	0.16076239035579445	0.295030852769512	0.611111111111111	0.50196129781075
Com_21294_pos	N-(2-morpholinophenyl)-2-furamide	C15 H16 N2 O3	272.119	2.514	273.126	Invalid mass	No results	No match					182685.0790401637	165586.3002712982	749639.1940638681	193525.5041242683	179353.71213373978	220279.73920454088	1824285.019614061	1473446.326483646	265612.8662515377	1573444.7320211288	2752670.8747471124	1581108.945597309	0.178560503687848	-2.48552	0.00227100748382595	0.972222222222222	1.20584715422284
Com_2130_pos	2,3-Dinor-TXB2	C18 H30 O6	342.205	6.056	360.239	No results	No results	Full match	Organic acids and derivatives	Hydroxy acids and derivatives	Medium-chain hydroxy acids and derivatives	Medium-chain hydroxy acids and derivatives	159810896.39359772	184845931.7282096	151735975.52394754	151950397.34216902	187456907.90186203	88338407.97855395	137082254.4466379	136938846.79110587	155870127.76656193	123537265.66817483	146090167.85550234	192273103.27040544	1.03627164132985	0.051402231046222054	0.894830476176042	0.638888888888889	0.309154567314802
Com_214_pos	Tetrahydrofuran fentanyl-d5	C24 H25 [2]H5 N2 O2	383.267	6.118	384.274	Invalid mass	No results	No results					1082931903.986415	842079513.1430504	942787804.1369988	1510656237.3567855	1135055076.0696828	237808370.6793451	1104101529.8354952	761883524.3110682	777523990.6426911	774193445.7059181	647077925.5776755	780307070.0273516	1.18704129117831	0.2473701199352436	0.854572097031869	0.75	0.253334319626858
Com_2154_pos	14(15)-EET ethanolamide	C22 H37 N O3	385.257	5.521	386.264	Invalid mass	No results	No results	Organic nitrogen compounds	Organonitrogen compounds	Amines	N-acylethanolamines	6825732.347940832	7142009.290417185	23137072.99664341	6729737.602276612	6529958.144669666	31686984.140924145	193206753.87988317	157339781.73343846	138130300.69982284	167852781.9835099	156199249.67370442	117905311.58293667	0.0881672909996241	-3.50361	0.000184844407493317	1	1.41924629745628
Com_21584_pos	1,4-dihydroxy-1,4-dimethyl-7-(propan-2-ylidene)-decahydroazulen-6-one	C15 H24 O3	274.153	3.654	275.16	Invalid mass	No results	No results					3875999.797685769	2092822.3601043709	2743165.08643284	1847553.7520834145	1907905.4775510323	2767235.606271228	3238345.3235452813	2000679.7984085684	2409069.327812184	1958508.1040743932	2695684.2663976857	2619324.535953984	1.02098102654353	0.029956056063021718	0.994825045020218	0.5	0.0205613440273952
Com_21673_pos	L-Methionine Methyl Ester	C6 H13 N O2 S	163.067	2.04	164.074	No results	No results	Full match					451540.9277197527	2024585.4438919253	967939.8880959433	3205811.665062808	1053392.099432226	487726.5998934931	1012830.697352443	2353053.0591099	2001432.6502593092	2646354.039497336	2099090.63248003	2051979.0136083688	0.67333922154867	-0.570595	0.123960854398945	0.75	0.733018893407025
Com_21710_pos	2,6-di(2-furyl)-3-propyltetrahydropyridin-4(1H)-one hydrochloride	C16 H19 N O3	273.132	1.376	274.139	Invalid mass	No results	No results					771872.1513841852	468021.1532722394	1824161.1672224891	891701.5315448735	111306.4118626317	1379116.9934978168	3430673.4857032755	2667541.250573656	1825580.3139008349	2271435.3700784594	2223455.127412346	2019360.68089286	0.37721027641611	-1.40656	0.0263224486622397	1	1.05398117954872
Com_2172_pos	Methylimidazoleacetic acid	C6 H8 N2 O2	140.059	1.325	141.066	Full match	No results	Full match	Organoheterocyclic compounds	Azoles	Imidazoles	Imidazolyl carboxylic acids and derivatives	106569861.74160495	89434008.05561222	81393529.9161924	144242065.5627075	81121917.31695634	158338609.5280019	73889197.5921808	66713667.66673475	83755367.71426997	90477813.5571506	83940020.42109719	97203436.33288395	1.33291796887442	0.41458799607606067	0.089678420880262	0.722222222222222	0.798104230388408
Com_21759_pos	4-(tert-butyl)-3-(4-chlorophenethyl)-2,3-dihydro-1,3-thiazole-2-thione	C15 H18 Cl N S2	311.058	1.443	312.065	Full match	No results	No results					2541290.9023062154	1819681.7150221765	1479612.2054214878	3156419.518507636	3112597.9491073736	1774719.6101474718	262494.44796481146	199001.18936971016	191648.320183173	202723.32953845465	190473.24350595492	206352.39526935917	11.0835797139165	3.4703520052848225	1.50664609681459e-06	1	1.48299017158144
Com_218_pos	SM 9:1;2O/32:1	C46 H91 N2 O6 P	798.663	11.175	799.671	No results	Full match	No results					3411737.1750196163	2754308.2118980438	2475411.045757145	2747388.591470981	3264947.932198327	2465214.4832073413	5587724.274500684	1443995845.5522246	105420391.0327313	3115528.768719785	3170824.6477870424	3107492.278277113	0.0109428735886929	-6.51386	0.145287878024601	0.833333333333333	0.722755183574335
Com_21848_pos	alprazolam-d5	C17 H8 [2]H5 Cl N4	313.116	3.739	314.123	Invalid mass	No results	No results					1923977.5493606608	3186307.7694799	1727830.6834781163	1403427.5528383877	863711.3011484687	2045520.8041243977	789439.5068195492	217858.86280828228	329161.3117468606	225093.78135473497	239579.2097231383	237654.44398256863	5.46931828759411	2.4513610223417537	7.50084911998532e-05	1	1.36170974757035
Com_2194_pos	3-Hydroxylidocaine	C14 H22 N2 O2	250.168	4.981	251.176	Full match	No results	No results	Organic acids and derivatives	Carboxylic acids and derivatives	Amino acids, peptides, and analogues	Alpha amino acid amides	35747821.31721722	50543091.31401147	129387238.18275416	59524793.84654232	44095862.03958541	156830588.1649527	85054509.29957557	67724174.90991497	73355814.85652065	40075355.325007856	59168840.67449836	48068503.8330156	1.27495773504096	0.35044942241160787	0.683324438823721	0.5	0.446979431707074
Com_2196_pos	Lysope 16:0	C21 H44 N O7 P	453.285	5.031	454.292	No results	No results	Full match	Lipids and lipid-like molecules	Glycerophospholipids	Glycerophosphoethanolamines	1-(1Z-alkenyl)-glycero-3-phosphoethanolamines	63896994.02000767	31966376.4825427	103564486.93985868	60614379.007130645	24777414.00913872	156771351.4099193	112863705.87859966	33643611.89281127	57698085.07948831	66016835.9605765	41951281.74537955	24941508.002108984	1.30991194239019	0.389469831192518	0.591633897144847	0.555555555555556	0.398600812297211
Com_21996_pos	cyclohexyl[4-(2-methoxyphenyl)piperazino]methanone	C18 H26 N2 O2	302.195	2.599	303.203	Invalid mass	No results	No results					3595702.587973726	872198.555066357	277346.3758710324	620091.7306780228	1072034.2190855143	403892.7640847043	563441.3026225398	443464.52866583376	551761.9395631375	531020.1963784118	450781.0547781237	334441.01255691866	2.37964532820401	1.2507465645538174	0.22713049576085	0.694444444444444	0.652317000688536
Com_220_pos	2,3-Dinor-11β-prostaglandin F2α	C18 H30 O5	343.236	5.782	344.243	Invalid mass	No results	No results	Lipids and lipid-like molecules	Fatty Acyls	Eicosanoids	Prostaglandins and related compounds	1520464200.303982	1424577168.2122543	1279463877.6614432	896155532.5580736	1431066936.0592537	1318657225.8783667	853842983.6025342	922727845.8553658	1101300210.7686124	583595797.9357117	977788088.4023504	1428687761.3697982	1.34125116062507	0.4235794193898557	0.0575864364783309	0.805555555555556	0.862184285211249
Com_22043_pos	Estriol	C18 H24 O3	288.171	6.642	306.206	No results	No results	Full match	Lipids and lipid-like molecules	Steroids and steroid derivatives	Estrane steroids	Estrogens and derivatives	2600082.363008246	3063923.118376435	2131054.8250099663	2858745.292019975	2401564.246158698	2063104.5332917625	2144839.5809727795	2257938.5969109144	2279745.701698533	2288249.7022715225	2383911.1993778283	2541287.0081256703	1.08797532170036	0.12164583263209844	0.312685677016864	0.638888888888889	0.540087768520864
Com_221_pos	10-Nitrolinoleate	C18 H31 N O4	325.226	6.51	326.233	Full match	No results	No results	Lipids and lipid-like molecules	Fatty Acyls	Lineolic acids and derivatives	Lineolic acids and derivatives	988165839.4451556	1518449084.092862	1215446383.5923018	771972266.2355657	873858389.4168597	947070473.1849412	874966654.4038844	849225668.5432189	1164756062.634004	909274543.3335592	1431410867.7905936	1332503385.5467353	0.962333194290296	-0.0553916	0.763185947148712	0.527777777777778	0.153652523802172
Com_222_pos	Furanyl fentanyl 3-furancarboxamide isomer-d5	C24 H21 [2]H5 N2 O2	379.233	6.618	380.241	Invalid mass	No results	No results					1612609684.1186488	1374167905.8796277	1309348952.0427003	1092627101.0174563	1184474226.6377156	943260665.545605	1391945173.2563102	1162948289.154947	809242490.0825264	276659182.14626807	842290728.0541288	1361811850.4433384	1.28599145855829	0.36288106044461593	0.216303061699142	0.694444444444444	0.610193398247346
Com_2227_pos	4,7-dimethylpyrazolo[5,1-c][1,2,4]triazine-3-carbonitrile	C8 H7 N5	173.069	4.027	174.076	Invalid mass	No results	No match					76590744.30105934	63060285.27888802	154354356.46566552	63378612.96959352	48714583.4732822	152822770.49296808	115892599.86505625	66600780.96946558	88749550.34226702	64235536.87687157	85534311.75067598	72892980.62156501	1.13163562315915	0.1784094976705248	0.855341833905481	0.583333333333333	0.354173452561807
Com_22305_pos	N alpha-Acetyl-L-Arginine	C8 H16 N4 O3	216.122	1.196	217.13	No results	No results	Full match					3385115.77218346	661747.8938479569	188603.8895527114	574181.712713588	1296037.1999256203	250606.55952472665	660272.3755164619	157799.12158924947	150768.70678065094	114199.69046576042	178982.81482211215	574026.4331667245	3.46194057727878	1.7915809616771208	0.0898719942392006	0.861111111111111	0.842612575114548
Com_2234_pos	YKK	C21 H35 N5 O5	419.253	5.282	420.261	Invalid mass	No results	No results					196678468.61093333	42828075.81399315	61498318.32783227	172458693.29774562	170539611.41191527	30012233.83487465	17959831.09149866	6938966.985624992	6847973.684564554	7668211.680669575	6666060.846574981	48982959.65773983	7.09012216312067	2.825810485378757	0.0014367260921875	0.944444444444444	1.22920750432981
Com_2244_pos	Ergocristine	C35 H39 N5 O5	609.291	5.051	610.298	Invalid mass	No results	No results	Alkaloids and derivatives	Ergoline and derivatives	Lysergic acids and derivatives	Ergotamines, dihydroergotamines, and derivatives	1955111.5805673976	6219363.722512913	4636818.535001554	4555072.378969522	1566522.391819249	2101085.761678452	115551771.26640096	159337925.46935642	162640208.9844022	152889311.07496855	145010748.3989563	113470228.40570442	0.0247779120904118	-5.3348	5.56131167556375e-06	1	1.47965892075056
Com_22464_pos	Guggulsterone	C21 H28 O2	312.207	7.835	313.215	No results	No results	Full match	Lipids and lipid-like molecules	Steroids and steroid derivatives	Androstane steroids	Androgens and derivatives	293459.0410096727	273477.35440001445	229517.50519557332	748944.3366740523	290702	220185.10754810245	267744.5422789217	265104.297691254	246646.75193816217	272238.4763891974	257236.06103694616	2918097.1378937145	0.486456641428415	-1.03962	0.614136292562529	0.555555555555556	0.368282720108541
Com_22606_pos	Luotonin A	C18 H11 N3 O	285.088	1.258	286.095	Invalid mass	No results	No results	Organoheterocyclic compounds	Diazanaphthalenes	Benzodiazines	Quinazolines	1553603.5486665207	635764.1189071349	1029656.205542229	1169522.0190625277	1185588.7713603312	2377383.7489886456	1115252.2765208597	622461.0347443428	626562.6093451335	640890.8355823829	571745.6906654611	549905.7787064698	1.92679153234074	0.9462004888481644	0.0189062247430018	0.916666666666667	1.02780498599217
Com_22630_pos	L-Cystathionine	C7 H14 N2 O4 S	222.068	1.438	223.075	No results	No results	Full match	Organic acids and derivatives	Carboxylic acids and derivatives	Amino acids, peptides, and analogues	L-cysteine-S-conjugates	2220639.098926428	2732306.897166382	1931280.469216395	2587307.370460631	2575833.205278536	1561986.899451621	1342735.1840910316	1197156.7994430051	1857159.3712918304	2301671.6530631827	1795658.4087202635	1938104.6658924392	1.30451685560614	0.3835155852763201	0.0687309813658123	0.805555555555556	0.830870987098444
Com_2264_pos	3-Hydroxypicolinic acid	C6 H5 N O3	139.027	4.881	140.034	No results	No results	Full match	Organoheterocyclic compounds	Pyridines and derivatives	Pyridinecarboxylic acids and derivatives	Pyridinecarboxylic acids	164783465.1588047	141903078.8113285	125184166.73809728	170694099.02938282	168448885.68588114	127755995.32681587	74479351.92084727	78341868.9589986	71312965.61065312	91950472.86117227	68823934.16526292	84646062.86560325	1.9140896134956	0.9366583752362856	7.28633846378532e-06	1	1.42032194034597
Com_22667_pos	2-(Dimethylamino)Guanosine	C12 H17 N5 O5	311.123	8.496	623.254	No results	No results	Full match	None	None	None	None	1675049.9271649255	1381656.6793328186	1131048.433868607	1303412.104145775	1603040.4910016302	1225275.7910500795	1466209.41301312	1309507.7197293777	2483634.397285767	1412833.840574565	1328204.3638538811	791723.7993894209	0.946243857581814	-0.0797161	0.955811914779166	0.555555555555556	0.0384470887448836
Com_2267_pos	1-(4-nitrophenyl)piperidine	C11 H14 N2 O2	206.106	5.114	207.113	Full match	No results	No results					203562135.5352104	117282627.24124928	61301530.95759401	124301505.79340409	123703341.67735352	81040161.0459202	81079737.46922284	40662046.95411208	45369115.51816917	35273358.259002656	36347140.87220661	55205962.706361055	2.41953352900156	1.2747289316879968	0.00262616453519131	0.944444444444444	1.20080295597755
Com_22747_pos	Dimetghyl 4-Hydroxyisophthalate	C10 H10 O5	210.053	8.947	443.095	No results	No results	Full match					725882.0254194401	602694.6627205043	508602.7067805346	575279.0658062489	746689.5714268619	538696.5922927618	2592994.788545771	1669925.675353698	1316365.8074363486	787766.583534807	2573711.3836762253	2174502.118760241	0.332681602543462	-1.58779	0.0019211614441556	1	1.30230725219246
Com_2283_pos	1-(4-bromophenyl)-2-phenylethan-1-one	C14 H11 Br O	223.121	2.366	224.128	Invalid mass	No results	No results					30667354.1992251	29542791.58093199	150852215.15360382	83310232.3072382	36190536.89792173	97628205.74641906	22832838.961027477	47885162.06661958	64087145.73740752	57042109.59964803	32710131.89213129	34384161.0087024	1.65362158796016	0.7256291283219146	0.293265332897966	0.638888888888889	0.638284616541219
Com_22872_pos	Acetylcysteine	C5 H9 N O3 S	163.03	3.735	164.038	No results	No results	Full match	Organic acids and derivatives	Carboxylic acids and derivatives	Amino acids, peptides, and analogues	N-acyl-L-alpha-amino acids	2533411.678337253	1510803.9828355007	2165362.701606126	2533823.4196929806	1562168.010364666	2008955.934220292	2329836.39863873	630540.12493888	1717862.429122707	1372120.3802483792	1910711.003599224	1947148.9021027535	1.24285963304278	0.3136633694812438	0.239766028576076	0.722222222222222	0.569046629168076
Com_2314_pos	KQH	C17 H29 N7 O5	411.223	5.644	412.231	Full match	No results	No results					132236260.03202528	109330016.56706227	58268525.60300604	97337524.9415313	202928215.0994637	52881123.52777112	37190799.17625049	34468747.43862136	39613319.75920179	40586068.6278912	40109787.267967485	54125122.72155375	2.65338479226675	1.4078339095056156	0.00675287002299422	0.972222222222222	1.2071062174423
Com_23150_pos	7-Methylguanosine	C11 H15 N5 O5	297.112	4.688	298.12	Invalid mass	Invalid mass	No results	Nucleosides, nucleotides, and analogues	Purine nucleosides	Not available	Purine nucleosides	2871222.433011647	2172964.9059760305	1120889.9651247568	925311.6672841423	278617.4351843065	599591.8588249965	774544.6090439846	599903.2323855427	588701.784924206	676272.3201066162	608855.9681322621	599218.7290106541	2.0711124670256	1.0504058979401516	0.24268432137046	0.722222222222222	0.582248204467312
Com_23165_pos	Deoxycorticosterone 21-glucoside	C27 H40 O8	492.271	4.207	493.278	Full match	No results	No results	Lipids and lipid-like molecules	Steroids and steroid derivatives	Steroidal glycosides	Steroidal glycosides	1153013.3704773576	1344051.8701897347	1261449.3186434617	2395892.647670238	736779.5727001592	1066220.057639987	557399.1293377582	743447.3957360227	615640.1416463504	1027950.572654242	572255.9731448407	520316.92810777546	1.97111390859303	0.9790111506146834	0.00814105795732149	0.944444444444444	1.12057015226983
Com_2321_pos	N6-Succinyl Adenosine	C14 H17 N5 O8	383.108	4.972	384.115	No results	No results	Full match	Nucleosides, nucleotides, and analogues	Purine nucleosides	Not available	Purine nucleosides	171658533.8681315	147853282.54255906	97630935.39644814	166313090.18818927	140803602.09753054	114472571.61836793	59109205.35079173	60040992.08973364	55925217.53304581	70383211.04620172	57574047.46620239	73636711.94377816	2.22670609334043	1.1549111469616182	7.58634718394644e-05	1	1.39784352154689
Com_23216_pos	EMK	C16 H30 N4 O6 S	388.178	3.576	389.186	Invalid mass	No results	No results					2831499.4319251366	493886.6262402979	173642.2236007773	342840.71649220097	784210.4591848912	374474.1815588491	217793.6971910201	194469.5645720272	202077.30497580563	202996.02908724063	194276.947047088	180148.7989067306	4.19593190999286	2.0689912665918544	0.0496843769865902	0.833333333333333	0.971555546034192
Com_2323_pos	Minocycline	C23 H27 N3 O7	457.19	4.71	229.602	Invalid mass	No results	No results	Phenylpropanoids and polyketides	Tetracyclines	Not available	Tetracyclines	5668805.288166815	18231833.29748549	67146308.58934286	26535674.795352064	4109256.650455928	32532783.67533585	109863795.8129642	108794568.1226524	157069744.55734548	135072022.3811821	104467674.33239909	90607682.1647791	0.218487063306974	-2.19438	0.00660590740738287	1	1.22696121313986
Com_23397_pos	Adenosine 5'-Diphosphate	C10 H15 N5 O10 P2	427.03	0.517	428.037	No results	No results	Full match	Nucleosides, nucleotides, and analogues	Purine nucleotides	Purine ribonucleotides	Purine ribonucleoside diphosphates	2322955.024508681	1610244.6089925685	1606316.8857990766	2130716.994911097	2030573.882821245	1284479.4140721934	2446492.0530766784	1546081.2744234074	1729587.07577918	1944000.9205796437	2055106.536472112	2416202.4116536444	0.905072190904621	-0.143895	0.387167915077714	0.638888888888889	0.579467870192423
Com_2354_pos	Arecoline	C8 H13 N O2	155.095	1.895	156.102	Full match	No results	No results	Alkaloids and derivatives	Not available	Not available	Alkaloids and derivatives	36595400.93349657	39651263.096469626	78142231.6945641	52477037.83611839	38876546.361399	146125839.31264657	40654654.0708672	52590196.51471551	73736790.93086167	99285830.85999958	55302143.33287382	47569917.8195798	1.06157234227533	0.08620268898765333	0.901472558258345	0.638888888888889	0.356045449223818
Com_2356_pos	gamma-Nonanolactone	C9 H16 O2	156.115	5.976	157.122	No results	No results	Full match	Organoheterocyclic compounds	Lactones	Gamma butyrolactones	Gamma butyrolactones	86223709.19709216	75667158.77381463	60116910.64481822	61528639.018820085	58753723.03246304	60603215.41817743	176485914.83929718	97667820.86952636	108766529.72548586	117273457.97674689	144466450.88286632	153999690.71944085	0.504461753663362	-0.987183	0.000217753928689705	1	1.34838904738587
Com_2358_pos	4-Acetamidobutyric Acid	C6 H11 N O3	145.074	3.551	146.081	No results	No results	Full match	Organic acids and derivatives	Carboxylic acids and derivatives	Amino acids, peptides, and analogues	Gamma amino acids and derivatives	87806284.82397223	81319066.39760922	123158687.75613126	86901807.44619927	77807886.11904188	146029031.87446833	124012542.38675074	76136560.2905677	86441221.61194557	80882522.08243863	112819829.6247762	98076142.89990774	1.04262668511086	0.06022269002683541	0.830043956269521	0.444444444444444	0.265927185326388
Com_23657_pos	Quinine	C20 H24 N2 O2	324.185	4.631	325.192	No results	No results	Full match	Alkaloids and derivatives	Cinchona alkaloids	Not available	Cinchona alkaloids	118551.1669210266	109132.2364058035	132978.1289010333	108557.97011327086	101998.27605293444	113795.66121399013	1094990.18223414	2072563.585526912	1391810.6416985765	1743639.5234549958	1731118.4996678184	650508.4509677949	0.0788765174701389	-3.66426	1.66944847158939e-05	1	1.47172628260399
Com_23692_pos	Deoxyribose 5-Phosphate	C5 H11 O7 P	214.025	1.383	237.014	No results	No results	Full match					1221925.668571567	856466.2129759828	595922.515275879	882458.9404570069	997391.1277970813	1020168.906492306	2302048.096693494	1327986.7401597467	1193030.493969161	991141.949506403	1095374.353900978	1440907.6338115467	0.667545720093756	-0.583061	0.0339733528829039	0.861111111111111	0.972087460222555
Com_2376_pos	Methyl indole-3-acetate	C11 H11 N O2	189.079	5.127	190.087	Full match	Full match	Full match	Organoheterocyclic compounds	Indoles and derivatives	Indolyl carboxylic acids and derivatives	Indole-3-acetic acid derivatives	194004193.2986016	101228361.822899	62150531.44663846	117482913.11543512	152273054.39893088	68440130.88125093	40175181.10925573	26327445.612574924	27985537.167511232	32873939.13734709	29638192.35239453	31170728.4538894	3.69652654694156	1.8861702742202506	0.000605343090639308	1	1.35815322916745
Com_2388_pos	5-Hydroxyindole-3-acetic acid	C10 H9 N O3	191.059	4.793	192.066	Full match	Full match	Full match	Organoheterocyclic compounds	Indoles and derivatives	Indolyl carboxylic acids and derivatives	Indole-3-acetic acid derivatives	49177327.63467594	166122468.8153635	47715621.63841558	112477454.73019037	38721483.952147104	8713307.439846542	8414914.552739073	6976907.507585321	6129947.758917793	7018901.2632929785	4437123.767568348	11623609.97815174	9.48238437419602	3.2452498747672287	0.00442831064292079	0.972222222222222	1.22829359224843
Com_239_pos	N-[4-(dimethylamino)phenyl]-N'-(3,5-dimethyl-4-isoxazolyl)urea	C14 H18 N4 O2	274.143	5.708	275.15	Full match	No results	No results					1056132001.9080384	1456370684.7273617	974688418.0850316	1395981982.269195	1297765179.1978924	977126020.0893456	416118161.8714799	662216609.1463476	624757307.5828465	750714445.8212405	443828349.5699069	777093090.8641436	1.94791678587763	0.9619320474582762	0.000612203256084208	1	1.28698131778621
Com_23928_pos	Saxitoxin	C10 H17 N7 O4	299.137	1.908	300.145	Invalid mass	No results	No results	Phenylpropanoids and polyketides	Saxitoxins, gonyautoxins, and derivatives	Not available	Saxitoxins, gonyautoxins, and derivatives	1119912.8142506275	1995732.8331279096	1704333.6639099938	2041589.8637482657	727290.8872750469	1631787.377445222	1210988.5865807703	1152223.0707528144	958249.155533952	1000452.4096384544	847638.347542887	968502.9682551528	1.50221008663517	0.5870865903167897	0.0843061455546639	0.777777777777778	0.868443354833024
Com_24146_pos	3-(4-nitrophenyl)[1,2,3]triazolo[1,5-a]quinazolin-5-amine	C15 H10 N6 O2	324.096	3.936	307.093	Invalid mass	No results	No results					2337578.5319376136	2000238.7157519488	1143631.63744429	1867418.769856899	1288201.4701193138	1089296.7074318414	454842.0193631679	358053.4919594516	394615.57586585777	380661.90639007406	341998.5820144481	305749.3808439642	4.35004905005286	2.1210316685174706	2.75547127804412e-05	1	1.43891450615578
Com_2416_pos	Nicotinamide N-oxide	C6 H6 N2 O2	138.043	4.791	139.05	No results	No results	Full match					159136956.93316448	154581029.25676408	108615357.37122644	159509779.14629638	144889183.90772313	133039674.60575776	41646653.02730147	49459003.46889485	43235468.09611424	45634339.26729283	48931496.16749286	52478248.33985186	3.0555	1.6114076035261478	2.21340271977729e-07	1	1.47907161627433
Com_24290_pos	PC 18:0_18:1	C44 H86 N O8 P	787.61	0.52	788.618	No results	Full match	No results					441848.8069466751	303938.58655951056	208909.8306660663	230196.00761199192	484000.0691255717	181884.12448714543	2062870.7647795277	261013.0537207073	370647.5756870963	281762.14056802914	283180.0713255084	458573.61713025934	0.497782119022824	-1.00641	0.274351913453044	0.666666666666667	0.606870649318483
Com_2437_pos	L-Glutamate	C5 H9 N O4	147.053	6.296	130.05	No results	No results	Full match	Organic acids and derivatives	Carboxylic acids and derivatives	Amino acids, peptides, and analogues	Glutamic acid and derivatives	105706101.9269586	44473245.75554926	101699904.84962288	51862854.48741397	111897121.9782491	23213651.911423333	170303914.63508394	111340137.94237164	109682997.18224156	91082349.15435296	119254886.88565704	155795449.93655673	0.579374533330995	-0.787432	0.0488386703004242	0.861111111111111	0.951750916756982
Com_2440_pos	Tyr-Tyr	C18 H20 N2 O5	344.138	4.994	345.145	No results	Full match	No results	Organic acids and derivatives	Carboxylic acids and derivatives	Amino acids, peptides, and analogues	Peptides	26958081.92166273	12261671.405899106	2331986.6577989664	18042914.944510333	12997261.635233516	4483659.809735453	82239122.55809964	46382608.92939598	61515151.555250674	55458213.007970944	54908277.97600351	167708300.46191522	0.164616946937556	-2.60282	0.00182225268833475	1	1.30000112085631
Com_24622_pos	3-Nitro-L-Tyrosine	C9 H10 N2 O5	226.059	4.982	227.067	No results	No results	Full match	Organic acids and derivatives	Carboxylic acids and derivatives	Amino acids, peptides, and analogues	Tyrosine and derivatives	1195236.5745474847	1839885.651549727	941069.6232212784	1001784.5534255968	1397738.937686956	896245.8596460929	1516222.1511416745	1426197.8359331363	1512070.9208398217	1506783.9161188982	1499223.345093529	1423516.994941619	0.818544438047396	-0.288867	0.0931455714495554	0.833333333333333	0.861571323258012
Com_24658_pos	N-Acetylglucosamine 1-phosphate	C8 H16 N O9 P	301.056	1.302	284.053	No results	No results	Full match					364698.98357216734	160989.90183276782	159120.6758655566	423041.791145109	284055.9869147705	1583308.9881251582	1130145.2435956774	186975.031134874	301860.4875742157	203641.37025186085	197763.98634391755	232317.9380243428	1.32073110904631	0.4013367745844915	0.691876433963203	0.555555555555556	0.193249758197915
Com_2493_pos	N-(1-benzothiophen-3-yl)-N'-(1-benzyl-4-piperidinyl)urea	C21 H23 N3 O S	365.159	4.98	366.166	Invalid mass	No results	No results					44681722.0408267	158478553.12916827	32991742.587940637	38760857.8618988	21826106.51052211	35272634.33292538	144763746.71841204	132080846.30172	94482059.34558088	60035971.16699152	76369221.35832909	110870654.81532194	0.536712374458371	-0.897779	0.0319789296163113	0.833333333333333	0.970547730349843
Com_2504_pos	Monolaurin	C15 H30 O4	296.196	6.453	297.204	Invalid mass	No results	No results					98598148.72048151	34261838.345936775	37921698.936340965	57029478.925205216	186180756.65005797	69701363.55484736	10110785.765963918	3201849.1693814043	2756758.092232061	3623688.8755162456	3186509.919524804	3471226.644537297	18.3559112494269	4.198172831356787	8.11529342974699e-06	1	1.41969484690215
Com_25099_pos	Boldione	C19 H24 O2	284.178	7.105	285.185	No results	No results	Full match	Lipids and lipid-like molecules	Steroids and steroid derivatives	Androstane steroids	Androgens and derivatives	1373830.2387796887	1661600.6757048448	1286339.966466618	1222986.2933510798	1592834.3214071535	286785.15264488047	334568.7387718011	379779.9861553335	304644.1067628286	308977.27144187805	374566.3778481897	1231257.0597913235	2.53064046436009	1.3395025540192709	0.0220235559040767	0.805555555555556	0.997649569895258
Com_2538_pos	Pyridoxal	C8 H9 N O3	167.058	1.816	168.066	Full match	Full match	No results	Organoheterocyclic compounds	Pyridines and derivatives	Pyridine carboxaldehydes	Pyridoxals and derivatives	163833432.02751634	126051648.15402144	37798373.51080876	149847166.52852634	171503568.7789813	52185203.07078991	35751691.85904003	23738080.3832629	27791331.800365668	33398688.639876805	29004124.2706718	58550282.77007059	3.36745545641618	1.7516588623223217	0.00669523627781023	0.944444444444444	1.17690484371295
Com_25398_pos	Adrenosterone	C19 H24 O3	300.173	6.507	301.18	No results	No results	Full match	Lipids and lipid-like molecules	Steroids and steroid derivatives	Androstane steroids	Androgens and derivatives	1183108.0788628734	1215390.0954424143	1166065.6274800354	1522003.2882831965	1222459.379568994	1122954.6410018888	1122549.4024152858	1222770.9775170616	1177494.1022680348	1071567.8926406142	1225408.0777351514	1351234.760881632	1.0363903192938	0.051567444779569066	0.558021110407903	0.472222222222222	0.321062636468489
Com_25460_pos	VNH	C15 H24 N6 O5	390.165	4.033	391.172	Invalid mass	No results	No results					1797694.474306916	642890.1679707785	488059.03457223246	632324.9367520033	463037.8166709183	486638.3301351079	174851.09001569386	151264.74649298628	150822.1698625495	163647.47993987703	157631.41962217324	164337.2506644579	4.68612049461339	2.228394050817828	0.00102243141888189	1	1.36355832050307
Com_2547_pos	Bisphenol G	C21 H28 O2	329.232	2.434	165.623	Invalid mass	No results	No results	Benzenoids	Benzene and substituted derivatives	Diphenylmethanes	Bisphenols	439857.5995716417	781218.6427304667	1934540.4101909413	1226075.9581263664	249793.60504920225	1793290.0555477606	160930833.402536	112821547.11469802	129313164.436705	131956084.88990866	110438811.20655677	104997460.45235102	0.00856114148222182	-6.86798	1.49684262876115e-05	1	1.47455044024599
Com_25601_pos	1-Methyluric acid	C6 H6 N4 O3	182.043	7.162	183.05	No results	No results	Full match	Organoheterocyclic compounds	Imidazopyrimidines	Purines and purine derivatives	Xanthines	508119.29844303953	486871.69037323096	429222.0327374776	417323.6186622027	521336.9481312378	1299544.628385312	492214.9978534129	541795.3308829861	441314.5381306185	448654.1325006769	830943.5985169177	503797.2788299021	1.1238824922948	0.16849120224411404	0.802978967336707	0.555555555555556	0.19791483887599
Com_2613_pos	Octopamine	C8 H11 N O2	153.079	1.311	154.086	No results	No results	Full match					45791686.87476094	57258035.69844557	24097131.889499303	85040547.47152594	175525641.24552017	79476370.18596227	52244666.63818968	49317718.10410762	52998858.80903772	54746651.84274162	53099587.729690574	60348685.51596076	1.44749956394236	0.5335629136042946	0.517498802170253	0.638888888888889	0.413053178686555
Com_26213_pos	Deoxyinosine	C10 H12 N4 O4	252.086	1.455	253.093	No results	No results	Full match	Nucleosides, nucleotides, and analogues	Purine nucleosides	Purine 2'-deoxyribonucleosides	Purine 2'-deoxyribonucleosides	786308.6491924037	867688.9018286004	866493.8388997697	1074303.353568409	467879.26477333385	1142565.36451932	223120.98746822352	169151.54672327702	162901.58811902965	172315.37588760612	161902.76977980617	175400.09152919162	4.88850180629697	2.289392385872237	1.92529723237973e-05	1	1.46054506774493
Com_2638_pos	N3-cyclohexyl-3-azabicyclo[3.2.2]nonane-3-carbothioamide	C15 H26 N2 S	266.186	6.865	267.193	Invalid mass	No results	No results					80881361.0575842	42454843.4073783	18315125.15718123	50426670.49514512	114781152.45268744	83747187.1372423	154404446.60441005	19716617.91244171	49271123.88448072	40433415.29751468	12727743.562774284	55942527.30472859	1.17477048464634	0.23237892444473346	0.482238503244883	0.638888888888889	0.434599090977715
Com_2646_pos	L-serine	C3 H7 N O3	105.043	6.552	106.05	No results	No results	Full match	Organic acids and derivatives	Carboxylic acids and derivatives	Amino acids, peptides, and analogues	Serine and derivatives	83600786.60447425	146935229.68638915	116113960.46217316	79721039.73947302	145853711.42167428	104786924.99758188	85130414.02262515	126543824.37129444	123157250.47965242	80786305.97313496	134380776.83152685	133831234.5655538	0.990029458690206	-0.0144566	0.906670844369837	0.527777777777778	0.0573373712294091
Com_26658_pos	Trehalose	C12 H22 O11	342.116	1.264	343.123	No results	No results	Full match	Organic oxygen compounds	Organooxygen compounds	Carbohydrates and carbohydrate conjugates	O-glycosyl compounds	1397894.6155523108	56015.15511553474	55488.312943756	68168.0905324932	437629.2504379864	96899.56754090938	136414.02048410883	58228.56652899303	58911.31438360237	65422.67531366029	59236.18491966217	67162.33776942645	4.74228351556015	2.245581916355487	0.220877128586312	0.611111111111111	0.656559593070676
Com_26666_pos	4-(3,4-dihydro-2H-1,5-benzodioxepin-7-ylamino)-4-oxobutanoic acid	C13 H15 N O5	247.086	2.321	517.161	Invalid mass	No results	No results					1019401.4348322772	778769.6325765478	617760.2382458269	1169140.38964568	834443.4030665103	561272.9858554434	438735.22888818	407963.11709919496	423453.3588640219	444132.97444608697	407470.367190582	401293.8891438635	1.97411473629416	0.9812058422118302	0.00223902129353894	1	1.31260774820708
Com_26797_pos	Sanguinarine	C20 H13 N O4	331.08	2.853	332.088	Invalid mass	No results	No results	Alkaloids and derivatives	Benzophenanthridine alkaloids	Quaternary benzophenanthridine alkaloids	Quaternary benzophenanthridine alkaloids	1353722.9438983402	145203.0699641751	182557.45191191984	157595.58426056517	165299.8731808843	174561.03449593578	201316.4533399904	166937.1036192867	165989.61559869925	166845.49295048718	182573.8057413044	189062.04144912653	2.03122044095904	1.0223468185708078	0.478518161782278	0.666666666666667	0.389754525136061
Com_2686_pos	6-(7-methyloctyl)-1H,3H,4H,6H-furo[3,4-c]furan-1-one	C15 H24 O3	252.17	6.572	253.177	Invalid mass	No results	No results					112835712.2954246	50486920.97045136	43513159.85742436	63176424.08751737	170900115.10945517	79118111.1854861	55586108.83943919	6450102.981312716	23493588.632257894	26713599.51169045	2627790.3629270582	22491260.58537333	3.78582676742659	1.9206083974408585	0.0143104969212711	0.944444444444444	1.08241913259824
Com_26873_pos	6-Phosphogluconic acid	C6 H13 O10 P	276.025	1.289	277.032	No results	No results	Full match	None	None	None	None	156554.87325512216	123188.15768314467	121757.8412435866	144581.74642086716	160368.20390078606	711152.7082814513	1202711.1828444714	837615.9141684605	869560.7398498992	422928.8736933649	354845.41109025705	732880.9998265991	0.320685375491275	-1.64077	0.0036876079254706	0.944444444444444	1.1722332854741
Com_2706_pos	Glycyl-L-leucine	C8 H16 N2 O3	188.116	3.085	189.124	Full match	Full match	Full match	Organic acids and derivatives	Carboxylic acids and derivatives	Amino acids, peptides, and analogues	Peptides	64959895.74208591	53867090.36589746	48989957.137194544	62286770.52935449	45318012.55589968	63367642.0372872	134899663.5238327	102152077.8424632	132079197.54978712	106539037.9253558	99213109.01629274	131100970.2835208	0.47988246394609	-1.05925	5.8122094503028e-06	1	1.42374553477435
Com_2724_pos	YLK	C21 H34 N4 O5	464.264	5.345	465.271	Invalid mass	No results	No results					24468153.43483692	65478577.46984765	68035489.53687389	63355893.19530053	12697718.72434492	59643327.49400564	111793068.11847298	91111135.89241534	98360824.01191044	111725839.27126127	90360719.97788762	147337368.78983974	0.451335706744841	-1.14773	0.0202394322184468	1	1.07752967418922
Com_2757_pos	Tetramethylpyrazine	C8 H12 N2	136.1	3.253	137.107	Full match	No results	No results					1.33644e+08	80960735.32940653	84273872.16886565	113660058.956886	109539624.38995984	73031605.54214044	81646354.22571187	97207212.09523864	102920896.96377169	119427461.46266945	125988071.02042052	145395054.63014454	0.884809352181619	-0.176561	0.339267001502523	0.666666666666667	0.56500003949285
Com_27645_pos	Mag (18:1)	C21 H40 O4	356.292	7.942	357.3	No results	No results	Full match	Lipids and lipid-like molecules	Fatty Acyls	Lineolic acids and derivatives	Lineolic acids and derivatives	675793.8628781142	461015.2945323982	361835.0029617072	790078.7524362471	1072572.3132049297	369801.612106701	461234.7398136681	444304.0474872251	795673.3781406617	780552.8438733014	426550.63596415607	427910.1621814471	1.11835860443757	0.1613828660782262	0.756549138134121	0.5	0.309198592358425
Com_2773_pos	Proscillaridin A	C30 H42 O8	530.286	5.358	531.293	Full match	No results	No results	Lipids and lipid-like molecules	Steroids and steroid derivatives	Steroid lactones	Bufanolides and derivatives	101693100.20534652	108444228.76393776	6374767.868419289	76953355.10561037	88854894.68093614	6159907.528339804	47369541.31832919	21283136.58840249	47140338.790623374	37631880.8654094	135428717.69739273	76130159.31166098	1.06437677841525	0.09000894043461599	0.641445385493422	0.555555555555556	0.462781143814014
Com_278_pos	Cocaine-d3	C17 H18 [2]H3 N O4	306.169	5.686	307.176	Invalid mass	No results	No results					991951360.6095678	1254474692.577367	789015695.5163318	1184612415.411981	1066319662.392888	754847870.7201561	613661406.6220328	787790177.4726845	667960365.5504607	806051358.6919495	660437923.2045189	804028836.5752375	1.39200899609187	0.4771685348757145	0.0119589126465389	0.861111111111111	1.08504044198843
Com_27970_pos	11-Ketoetiocholanolone	C19 H28 O3	304.203	7.798	305.21	No results	No results	Full match	Lipids and lipid-like molecules	Steroids and steroid derivatives	Androstane steroids	Androgens and derivatives	384278.86067954457	350370.64495299227	463695.87074994046	330733.27062619786	393214.61031226814	371634.5121087141	556184.5704591579	524045.2736211014	816151.5166243761	583639.5762621283	715481.3120610431	477118.4308998839	0.624602421362726	-0.67899	0.0013001639398071	1	1.26228073542555
Com_27983_pos	2-(4,4-diphenyl-1-piperidinobuta-1,3-dienyl)phenyl acetate	C29 H29 N O2	405.209	7.737	406.216	Invalid mass	No results	No results					191300.51715325064	275785.81274585705	760412.6633201131	442518.11984042544	203920.17352361785	712822.6537470485	600550.1319418327	548435.9883031552	592239.826539579	239948.13020701095	471952.3287363618	265108.2968294625	0.951632299409836	-0.0715239	0.66066848363086	0.555555555555556	0.438973777877145
Com_28111_pos	L-Carnitine	C7 H15 N O3	161.105	3.028	162.113	No results	No results	Full match	Organic nitrogen compounds	Organonitrogen compounds	Quaternary ammonium salts	Carnitines	103189.6331287022	87844.54024119882	86203.30285163692	88446.76889314996	100172.32823969016	86369.46490243217	896391.0229359175	90770.8953718472	94225.4725423815	750342.4810016442	95856.89693595115	106053.58116033704	0.27154557504276	-1.88073	0.152152362856823	0.833333333333333	0.716268023130815
Com_2812_pos	Methyl dihydrojasmonate	C13 H22 O3	226.157	5.976	227.164	Full match	No results	No results	Lipids and lipid-like molecules	Fatty Acyls	Lineolic acids and derivatives	Jasmonic acids	29573382.80087736	85019157.78233115	61355841.99785529	134506710.86730787	126665088.58045696	88756683.42104542	12099663.16728902	50025955.77179752	48928768.1248966	75359034.64785357	26960348.051771738	49828442.44109967	1.99799561350521	0.9985534157723597	0.0651832572452314	0.861111111111111	0.831955136468395
Com_2813_pos	6-(4-phenylpiperazino)hexanoic acid hydrochloride	C16 H24 N2 O2	276.184	4.88	277.191	Full match	No results	No results					2425498.145110734	14108594.920789668	119887315.37944049	26600764.550194982	11263794.404872742	44837490.12849454	10236764.247637922	13100293.31013911	14718956.564277409	3932138.86746712	13832640.057857169	8927370.876136499	3.38424202712135	1.7588327477846308	0.285287841136069	0.722222222222222	0.651917984878631
Com_28148_pos	Methylmalonate	C4 H6 O4	118.027	7	119.034	No results	No results	Full match	Organic acids and derivatives	Carboxylic acids and derivatives	Dicarboxylic acids and derivatives	Dicarboxylic acids and derivatives	773388.8014557377	403841.2950429859	376284.1170933896	388165.5036445017	914495.5898619472	556303.9025575073	691310.4199106498	515775.1390436327	779852.6040599963	438282.52403921576	484127.1000503754	483818.845555475	1.00569160877949	0.008187976422649077	0.854211057423766	0.583333333333333	0.277784058910562
Com_28274_pos	N-Acetylhistamine	C7 H11 N3 O	153.091	4.708	154.098	No results	No results	Full match	Organic acids and derivatives	Carboxylic acids and derivatives	Carboxylic acid derivatives	N-acetyl-2-arylethylamines	275628.6921470543	314704.1787081272	495785.351076112	271889.8417905381	213787.42175517892	241681.70984191255	539378.1392956327	479371.0105732339	749148.6473880997	485851.2847549086	617641.9889277075	350743.9366925559	0.562818501094279	-0.829258	0.00428737471684079	0.916666666666667	1.15239502134695
Com_28323_pos	Dibenzoyl Thiamine	C26 H26 N4 O4 S	490.166	4.717	491.173	No results	No results	Full match	Benzenoids	Benzene and substituted derivatives	Benzoic acids and derivatives	Benzoic acid esters	173829.61201965774	166043.3717027869	179716.92127542334	424359.07589857	303052.1026141752	696368.4882106589	322965.1726051126	306791.85719193047	299620.8409299804	310939.1571067325	279942.200651658	290606.02914426656	1.07317182409531	0.10188108254783776	0.751425668350837	0.583333333333333	0.172156641357894
Com_2838_pos	N-acetyl-L-ornithine	C7 H14 N2 O3	174.101	5.647	175.108	No results	No results	Full match	Organic acids and derivatives	Carboxylic acids and derivatives	Amino acids, peptides, and analogues	N-acyl-L-alpha-amino acids	38096216.69620159	15116171.8378437	18403674.622938603	10516891.426811928	7713930.4981134655	12880208.384281792	98406986.05385303	104668991.38942114	103431645.3460552	91641761.47420572	94933676.5168758	141193842.56527442	0.16195937913603	-2.6263	0.000189169236670619	1	1.41517304754359
Com_2843_pos	Methyl 3-indolyacetate	C11 H11 N O2	189.079	5.461	190.086	No results	No results	Full match	Organoheterocyclic compounds	Indoles and derivatives	Indolyl carboxylic acids and derivatives	Indole-3-acetic acid derivatives	135665829.2415316	87327004.17976063	74661855.71175246	85748914.26933153	161441817.238448	60663007.92988926	51879051.86495094	54781729.33169216	54825758.94402371	61824947.269583285	54628416.46123125	82149756.00194275	1.68154905859712	0.7497908695943959	0.0246018526552855	0.916666666666667	1.0400302933488
Com_2847_pos	VMH	C16 H27 N5 O4 S	407.161	5.212	408.168	Invalid mass	No results	No results					4518724.370391165	3976936.80768263	3838676.4753205697	4270679.708210129	4540175.377820279	4344331.9251206815	87661863.45860165	127714138.4583438	114379923.64961413	105831248.30386378	90141814.52395289	61314311.33775973	0.0434201781643299	-4.52549	2.31294584215647e-07	1	1.50150618336908
Com_2853_pos	Phenylglyoxylic acid	C8 H6 O3	150.032	2.795	151.039	No results	No results	Full match	Benzenoids	Benzene and substituted derivatives	Benzoyl derivatives	Benzoyl derivatives	144594641.2936115	119918143.05589658	110053951.85075668	132316397.36670008	80600056.36457545	105282896.80704635	13073371.026977029	11908552.785452249	16640934.306291746	10337330.722454388	12261772.271582523	16002901.751683218	8.63530409405847	3.1102469834595046	3.72080326450063e-09	1	1.49078617862377
Com_28561_pos	alpha-Benzylsuccinic acid	C11 H12 O4	208.073	7.704	209.08	No results	No results	Full match	Phenylpropanoids and polyketides	Phenylpropanoic acids	Not available	Phenylpropanoic acids	442115.9294801609	326341.0866531812	352320.33085652173	248094.63169510217	310003.1158572825	339005.52907828003	295575.2413012978	378732.123492821	308501.5443225759	359526.3113392124	720141.2293546863	225460.77079823436	0.881965031839276	-0.181207	0.704369525940989	0.5	0.22975532768843
Com_2869_pos	2-Amino-1,3-octadecanediol	C18 H39 N O2	301.298	6.908	302.305	Full match	Full match	Full match	Organic nitrogen compounds	Organonitrogen compounds	Amines	1,2-aminoalcohols	132448445.73280196	105190465.53508066	67859674.36278495	110184174.58184992	159925548.6456974	81725794.52353787	70768924.15067649	51330288.07840266	33426175.07159624	45945133.71466004	68053286.00688465	37760308.182501	2.13917371857578	1.0970536460144986	0.0016519944032876	0.944444444444444	1.21354970364428
Com_28785_pos	N2-Methylguanosine	C11 H15 N5 O5	297.104	4.72	298.112	Invalid mass	Invalid mass	No results	Nucleosides, nucleotides, and analogues	Purine nucleosides	Not available	Purine nucleosides	733777.8098506043	650991.4315782218	607411.0473368443	622463.1185730587	603023.7178055183	483972.49322254345	569559.3745857853	483285.2885817863	495372.6108095431	489818.4770911097	462358.9139812463	482628.49109620514	1.24090207303306	0.3113892683095263	0.0108079016685231	0.916666666666667	1.10161993606197
Com_28789_pos	Lapatinib Ditosylate	C29 H26 Cl F N4 O4 S	580.134	3.558	581.141	No results	No results	Full match					121111.95746488488	107887.57736004826	123029.56586603264	108894.76582720946	118736.54265412263	126249.04340377572	154311.9147988701	558879.8171653616	642244.1070706063	640650.5728108202	329133.627995025	127639.6262451646	0.28779039516049	-1.79691	0.0159426061206442	1	1.12793600864343
Com_2888_pos	N-P-Coumaroyl Spermidine	C16 H25 N3 O2	291.194	5.485	292.202	No results	No results	Full match	Phenylpropanoids and polyketides	Cinnamic acids and derivatives	Hydroxycinnamic acids and derivatives	Coumaric acids and derivatives	122272811.1100646	127737585.77357069	63587451.72578198	130115860.4395769	6064862.775309546	115796373.56092644	70821220.85614534	72513828.86621174	77999096.39478172	71135876.800617	60278537.88034329	99871828.68456994	1.2495569323151	0.32141663499603973	0.839276051119977	0.694444444444444	0.169530970564559
Com_289_pos	3-isopropoxy-4-morpholinocyclobut-3-ene-1,2-dione	C11 H15 N O4	242.127	5.076	243.134	Invalid mass	No results	No results					297519675.3256707	327802638.27708113	1029616187.6654656	254778938.2676207	167237735.9082257	919712149.251742	510407616.4054045	332850233.18044734	453303030.56206346	320328131.3722446	377209305.9633208	307847644.1252436	1.30179742473258	0.380504965345583	0.870372802482191	0.611111111111111	0.41614395863285
Com_2890_pos	tert-Butyl N-[1-(aminocarbonyl)-3-methylbutyl]carbamate	C11 H22 N2 O3	230.163	5.472	231.17	Full match	No results	No results	Organic acids and derivatives	Carboxylic acids and derivatives	Amino acids, peptides, and analogues	Leucine and derivatives	105908623.54369415	41109341.841604896	14756203.163292613	44638975.6976508	158028764.0858869	35155974.66466478	11881593.430894164	3653601.032616037	5311748.122803266	4721294.093558735	6080765.196070269	13846443.607225267	8.78325025182214	3.1347549095181377	0.000967469168770432	1	1.28088831962939
Com_29_pos	1-(3,4-dimethylphenyl)-3-piperidinopyrrolidine-2,5-dione	C17 H22 N2 O2	286.168	5.591	287.175	Full match	No results	No results					4724793.162728472	10838349.477033218	45825345.84142142	5470208.549103524	4754602.688932756	21814945.200346544	6771195866.671677	7366833908.321846	9099311997.484358	7185066325.340713	5153378927.624437	3958067710.535016	0.00236324652740075	-8.72501	3.91851588321084e-06	1	1.47929737832101
Com_29113_pos	2-methyl-3-(2-thienyl)-3,3a,4,5-tetrahydro-2H-benzo[g]indazole	C16 H16 N2 S	268.1	2.686	269.108	Invalid mass	No results	No results					81555.53002780445	287386.6454307911	423163.9402626498	124993.0457556234	163750.02282972643	537577.777881632	229531.28858657903	470760.0963529659	513925.7881583773	106963.02109168126	309334.4303127222	472156.3220459186	0.769700539613697	-0.377631	0.394951655192372	0.638888888888889	0.467689286568818
Com_2949_pos	N,N-Diethyldodecanamide	C16 H33 N O	238.23	6.382	256.263	Invalid mass	No results	No results					112459936.92764077	115029261.51284818	62274243.40451793	127557214.72418696	137319173.74426916	86301792.66757447	103131059.53110616	85265662.8979077	37330188.72900238	76658601.1690556	62342517.61027008	75871186.30486573	1.45470441016104	0.5407260333274493	0.0654052309734908	0.833333333333333	0.849117744538892
Com_29604_pos	Cyclohexylsulfamate	C6 H13 N O3 S	179.062	1.457	180.069	No results	No results	Full match	Organic acids and derivatives	Sulfamic acid derivatives	Cyclamates	Cyclamates	100167.38015483416	85342.77401283896	135367.9416218254	99752.79696446696	83583.55262287133	103123.5141764092	373315.0202160901	444467.6506031365	291762.16356162523	370202.59907531017	471458.0393675959	350310.3679419821	0.263886065346905	-1.92201	1.05377845658764e-07	1	1.46781359055241
Com_29795_pos	5-fluoro AB-PINACA N-(4-hydroxypentyl) metabolite	C18 H25 F N4 O3	386.168	2.028	387.175	Invalid mass	No results	No results	Organic acids and derivatives	Carboxylic acids and derivatives	Amino acids, peptides, and analogues	N-acyl-alpha amino acids and derivatives	27018.046427521105	25513.43521292409	58480.89734075632	88791.27847315893	25619.726210915305	27011.93526160692	278206.78090171627	383375.6044890863	338071.17978498264	414606.88105953706	395033.3804953561	229950.6903380455	0.12378864663554	-3.01405	4.43951631791886e-05	1	1.42670986143705
Com_2981_pos	3-hydroxy-1,5-diphenylpentan-1-one	C17 H18 O2	254.127	5.057	255.134	Invalid mass	No results	No results					53569332.95594794	92315872.8741391	83227811.37323947	63541541.7552248	47643881.10023845	111699901.35654213	53153159.13357787	7000972.45486444	51854897.67704061	48898135.82267757	51897292.06721273	80289488.04603381	1.54216198872593	0.6249543139281778	0.16536580785885	0.805555555555556	0.669567211165518
Com_2982_pos	Androsterone	C19 H30 O2	307.251	6.766	308.258	Invalid mass	No results	No results	Lipids and lipid-like molecules	Steroids and steroid derivatives	Androstane steroids	Androgens and derivatives	96270145.57793345	89924964.7699956	105168484.82183763	50310822.51861492	71982097.28731579	111681501.6029865	74767087.2001738	72861120.0628104	90699764.26395306	43553612.59598377	76160056.34056868	118816312.01547304	1.10166562987509	0.1396864132737443	0.570818887243365	0.583333333333333	0.280602929960501
Com_29858_pos	Uridine	C9 H12 N2 O6	244.07	3.902	245.077	No results	No results	Full match	Nucleosides, nucleotides, and analogues	Pyrimidine nucleosides	Not available	Pyrimidine nucleosides	471182.5001798337	167869.66859727944	342611.968281746	176619.33109823428	269424.529852773	268609.351337972	374361.26167539146	294698.71140070504	324791.41892989894	313306.7427399776	281484.59289971093	251649.40593983565	0.921765255847087	-0.117529	0.444242223399152	0.638888888888889	0.377811688246611
Com_2987_pos	SM 40:1;2O	C45 H91 N2 O6 P	808.645	11.173	809.652	No results	Invalid mass	No results					3929367.660891821	3158934.073765314	2735488.2513398128	3112318.936914364	4063391.2109534894	2793615.156560704	3879673.175064852	3149320.150036849	118266709.95629963	3460101.642450639	3594360.204156724	3560648.8597086933	0.14563311564166	-2.77959	0.311278387863803	0.694444444444444	0.506739403579911
Com_299_pos	Ecgonine	C9 H15 N O3	185.105	5.503	186.113	Full match	Full match	No results	Alkaloids and derivatives	Tropane alkaloids	Not available	Tropane alkaloids	45119748.925968885	44219120.64247719	30770105.191009384	57266201.16750184	62353870.44129381	29198205.592175968	806637979.7663087	864905138.6095431	765663058.2528441	933289454.8843844	1095996246.735383	312405184.10121804	0.0562739160211586	-4.15139	4.37482519380301e-07	1	1.46874078946181
Com_30077_pos	PC O-38:0	C46 H94 N O7 P	803.691	8.771	804.698	No results	Invalid mass	No results					111083.26316653728	95310.6279767443	77174.8783243664	96789.12304244583	126644.82223791332	85919.93648054208	101769.76761399992	101442.53440470473	89899.28055127435	104911.969370951	93138.02602844586	324926.4012293563	0.726542562005023	-0.460881	0.372591180977046	0.611111111111111	0.567426873954661
Com_3009_pos	DMK	C15 H28 N4 O6 S	392.174	5.69	393.181	Full match	No results	No results					5886249.488943341	5186049.750087969	4504798.631366312	5434013.12452566	5815419.417841292	4257425.739574616	93129834.7715328	53389177.12837779	53347408.20696211	71085566.9054826	82167455.58930306	131933907.40900002	0.0640835820465031	-3.9639	1.01910700702882e-06	1	1.49383335040294
Com_3014_pos	Norbuprenorphine	C25 H35 N O4	413.253	5.031	414.26	Invalid mass	No results	No results	Benzenoids	Phenanthrenes and derivatives	Not available	Phenanthrenes and derivatives	1655251.8250079518	1393869.491015253	3343292.630083661	1385202.1246439605	1286088.9543014858	1741970.2151330682	27389843.91693457	95232979.83291636	103686680.3455312	124009489.5067606	70431712.12536062	10120189.2315964	0.0250786845122391	-5.31739	0.000145992505139402	1	1.40589988235327
Com_3038_pos	benzoylecgonine-d3	C16 H16 [2]H3 N O4	292.153	5.629	293.161	Invalid mass	No results	No results					63521592.86105955	4.40904e+07	47268456.67681335	68266075.03779909	65320502.20960754	48213419.62290912	76135974.2868237	102089357.5762214	116029042.20540136	108353674.2476364	85009804.54683118	126556863.92323013	0.548183463408982	-0.867269	0.000296864390172822	1	1.3219780787891
Com_3094_pos	(2E)-6-hydroxy-2-methyl-6-(4-methylphenyl)hept-2-enoic acid	C15 H20 O3	270.122	1.442	271.129	Invalid mass	No results	No results					13533892.652013509	23212247.437364843	10783536.094977072	15786280.508206887	8593035.653756998	7087937.754879643	45765852.16963409	69599130.75179958	48370468.00452628	39073847.993255146	34639917.73923588	127834638.48919515	0.21626176188178	-2.20915	0.000202982747449878	1	1.3321974964984
Com_3095_pos	H-Gly-Pro-OH	C7 H12 N2 O3	172.085	1.432	173.092	No results	No results	Full match	Organic acids and derivatives	Carboxylic acids and derivatives	Amino acids, peptides, and analogues	Dipeptides	143674606.70070267	69700325.91113223	43032050.76916468	72602006.29893968	83333645.73383394	50512755.7100269	95972445.64830203	59936212.783377126	64677917.93591657	60338837.46471543	60006920.57884541	89613965.93024518	1.07504208201715	0.10439313453955003	0.942270480184498	0.5	0.436672298843509
Com_3144_pos	2,4,5,6,7-pentamethyl-1H-benzo[d]imidazole	C12 H16 N2	188.131	6.841	189.139	Full match	Full match	No results					15548361.60941196	19411543.433399927	105751476.7253638	37124910.12977029	14355110.09555602	88698676.93309574	82966821.69375755	54846663.729407154	54595687.01141354	64891058.51440536	102739677.0420515	69360903.36094277	0.654144266849915	-0.612319	0.103334355873956	0.694444444444444	0.834051394227343
Com_3151_pos	L-Tyrosinemethylester	C10 H13 N O3	195.09	5.025	196.097	No results	No results	Full match					74621515.92079832	64059769.19025052	86622134.46690889	62534755.625475295	75848485.05404517	105285225.7344958	40995710.77971296	7406154.837984183	35584310.80210479	32703258.86213976	33905825.48478724	43503386.45309318	2.41615226437333	1.2727113752484212	0.0131453122775484	1	1.12137597029793
Com_3171_pos	Dl-Indole-3-lactic acid	C11 H11 N O3	205.074	5.509	188.071	No results	No results	Full match	Organoheterocyclic compounds	Indoles and derivatives	Indolyl carboxylic acids and derivatives	Indolyl carboxylic acids and derivatives	91823172.7893564	58191786.40180673	42034026.197777286	43369156.86742646	76055710.68709348	32629542.25555737	112777402.09178528	110363083.44385214	111012756.7748476	113531993.95289612	110313437.6896091	99102836.75045437	0.523668549826717	-0.933274	0.00651588762207557	1	1.25752885576811
Com_3195_pos	13,14-dihydro-15-keto-tetranor Prostaglandin E2	C16 H26 O5	280.165	6.506	281.172	Invalid mass	No results	No results					44851259.30146347	14100889.266052073	15791076.068539351	33466641.16872128	141064977.3109383	27408178.60563881	3650535.194887842	3920191.2286580782	3591905.933254408	3427624.336165525	3847266.356735136	4430574.605143853	12.0990834435559	3.596825856311145	0.00137534502030441	1	1.34833602664852
Com_3214_pos	D-Alanyl-D-alanine	C6 H12 N2 O3	160.085	1.422	161.092	Full match	Full match	Full match	Organic acids and derivatives	Carboxylic acids and derivatives	Amino acids, peptides, and analogues	Dipeptides	35365298.628430724	43706618.23000254	28324424.00117789	32909127.691074137	13441547.25215386	16737286.881833008	124416947.3672121	78933782.84898953	97275104.93350647	73913159.41607161	79298121.94381933	121137194.24274509	0.296507686511414	-1.75386	0.000417749667239559	1	1.34410101446444
Com_3235_pos	PC 18:0_19:0	C45 H90 N O8 P	1607.28	11.208	804.648	No results	Invalid mass	No results					4648865.879085845	3719013.9386297152	3274123.019208294	3614872.079073008	4565221.968268132	3256948.884626531	87040906.42966166	110207050.71364172	3512501.6713369936	3931471.78416044	11178608.979868012	4306061.456571062	0.10482061063881	-3.25401	0.10611424795338	0.777777777777778	0.795291804902194
Com_324_pos	2-[2-(1-isobutylcyclohexyl)-1-methylethylidene]hydrazine-1-carboxamide	C14 H27 N3 O	275.2	5.264	276.207	Invalid mass	No results	No results					42409400.30053789	64773218.09486664	922914220.5319515	400133626.7194751	300892112.28867453	550171366.9123764	502593939.9177658	268205825.6871382	205855335.9210273	299474125.75793964	452115462.3975927	397384242.57348526	1.07323244910286	0.10196258014720566	0.511015547199185	0.527777777777778	0.39210471314512
Com_325_pos	4-Methyl-5-thiazoleethanol	C6 H9 N O S	143.041	4.729	144.048	Full match	Full match	No results	Organoheterocyclic compounds	Azoles	Thiazoles	4,5-disubstituted thiazoles	1232813216.9033642	887354301.9756107	455496061.2800375	998708640.4727414	1072032523.5732396	617596301.2382052	396422929.6028139	299516238.038849	347788278.14433897	357709313.5981643	323468459.4414085	323424896.2767732	2.56989877101923	1.3617115324055968	0.00162229728565246	1	1.31973711132791
Com_3278_pos	3-amino-2-phenyl-2H-pyrazolo[4,3-c]pyridine-4,6-diol	C12 H10 N4 O2	242.08	5.716	243.088	Full match	No results	No results					117092114.32398452	84627649.08203374	65038506.71149282	79975632.29145703	137139103.03413433	71397576.92948933	39551058.68685316	31036372.25463447	30361511.278770227	34316331.75106652	27986666.36119284	39368163.251734085	2.74045157686787	1.4544136428311345	0.000122117716795459	1	1.38923286477881
Com_3328_pos	7-(2-aminophenyl)heptanoic acid	C13 H19 N O2	243.126	6.34	226.122	Invalid mass	No results	No results					81805492.37382227	77379649.53402498	55147079.91072595	83068651.01843488	83374885.84170943	98600867.98752388	10343593.166429255	11662883.273738325	3685523.039030858	7717759.022968272	8669971.010165384	25264073.12872548	7.11834805678138	2.8315424761907724	0.000228397005257402	1	1.40027373845312
Com_333_pos	(-)-Caryophyllene oxide	C15 H24 O	220.183	6.223	221.19	Full match	No results	No results	Lipids and lipid-like molecules	Prenol lipids	Sesquiterpenoids	Sesquiterpenoids	121784795.98511308	148475104.71925512	172850207.01208192	93006737.50946245	1237057381.9881802	149793094.03787404	73457810.8757583	163835772.39972055	221338294.15339515	132428824.50408034	181598119.8970832	273273630.4460888	1.83851960713836	0.8785445624375605	0.671394174113666	0.583333333333333	0.262580316397535
Com_3357_pos	Mesalamine	C7 H7 N O3	153.043	2.286	154.05	Full match	Full match	Full match	Benzenoids	Benzene and substituted derivatives	Benzoic acids and derivatives	Aminobenzoic acids	69556786.32344283	68003892.98179886	88609901.56960973	99570416.35610284	56411699.27394097	97477473.67355524	94071103.4632039	76938254.23829155	82424357.54276748	86125945.70807499	71653557.69631664	77995558.15816416	0.980420206908613	-0.0285279	0.723759804620417	0.527777777777778	0.305238351505252
Com_3358_pos	Cyclohexaneacetic acid	C8 H14 O2	142.099	5.768	143.107	No results	No results	Full match	Organic acids and derivatives	Carboxylic acids and derivatives	Carboxylic acids	Carboxylic acids	124505585.00618587	71105792.22436401	64731209.35144919	86951207.75578429	81795200.24911581	66598241.91890288	96790538.3536314	65059981.64128345	72007326.77037305	63050025.62901276	60513436.83904301	116063485.21097834	1.04689156298575	0.06611201567413305	0.739320524360441	0.611111111111111	0.412308518093641
Com_3367_pos	1-(6-methyl-3-pyridyl)ethan-1-one O1-ethyloxime hydrochloride	C10 H14 N2 O	178.111	0.631	179.118	Full match	No results	No results					110072956.78389367	30845054.84597842	26933842.83062405	39861072.68049645	44541894.58937672	27624299.213817555	23876816.33985649	21957924.300362613	22637849.53228711	27097993.446291074	108247379.68094753	31942998.11840831	1.18713089419323	0.24747901669187455	0.496917115996514	0.75	0.365608414122579
Com_342_pos	Anabasine	C10 H14 N2	179.142	5.22	163.123	Invalid mass	No results	No results	Alkaloids and derivatives	Not available	Not available	Alkaloids and derivatives	1075661836.594597	947898647.7087976	765243673.0043505	1005915702.8876568	986798828.6339868	116934275.12280712	464354712.1801936	413814018.9893891	413614164.1797092	455961718.7637981	348012942.66109973	273816575.35980713	2.06722925335986	1.0476983908655406	0.187009412669911	0.833333333333333	0.662684330120745
Com_3424_pos	3-[(4-hydroxyphenyl)methyl]-octahydropyrrolo[1,2-a]pyrazine-1,4-dione	C14 H16 N2 O3	278.127	4.927	279.134	Invalid mass	No results	No results					17418232.961829863	11724687.649734816	11596928.381002864	8773714.28115245	7826149.422342127	5283002.852758354	9653549.932763165	103259320.29893956	8154641.641184985	7130123.192354437	6913268.9313618615	8367619.798964019	0.436460550974492	-1.19608	0.638567024163612	0.583333333333333	0.234219594037015
Com_3448_pos	o-Cresol	C7 H8 O	108.058	5.8	109.065	No results	No results	Full match	Benzenoids	Phenols	Cresols	Ortho cresols	126487224.26290683	98213522.36321712	83283827.8070271	96300902.13483658	122080355.4826136	85122968.23691972	90712042.78988458	73834268.6918445	75188622.36625764	74755166.52669784	80590816.73073311	97198675.05295493	1.24215752598332	0.31284814259548194	0.0390631895452245	0.861111111111111	0.969467639085316
Com_3455_pos	5-Methyl-2'-deoxycytidine	C10 H15 N3 O4	241.107	2.122	242.115	No results	No results	Full match	Nucleosides, nucleotides, and analogues	Pyrimidine nucleosides	Pyrimidine 2'-deoxyribonucleosides	Pyrimidine 2'-deoxyribonucleosides	15591868.473744284	29368771.32364292	61823249.07970152	25854661.439231675	8687696.130579565	94194057.45529376	61616557.059359714	46479072.6012905	36410830.76781356	31128403.497478604	43486220.97720224	46362907.071083546	0.887135612775692	-0.172773	0.323636089870793	0.666666666666667	0.583056801435533
Com_346_pos	SM 8:1;2O/32:0	C45 H91 N2 O6 P	786.664	11.514	787.671	No results	Full match	No results					3362783.523017453	3147775.738714457	2590312.694293125	3083857.208958402	3630924.2911696807	2680162.723722751	3450617.1404447453	16978708.62617125	946504862.5031044	7184260.447054057	3234482.0078956936	3191942.028347288	0.0188627942420894	-5.72831	0.177045483030532	0.861111111111111	0.670250164253587
Com_3461_pos	1-(3,4-dimethoxyphenyl)ethan-1-one oxime	C10 H13 N O3	139.123	5.136	140.131	Invalid mass	No results	No results					2354826.5607655984	1977935.5626269688	94080802.50122803	3347758.845946574	1555562.1716160416	27048355.234571826	13009600.0594046	1651849.4560838449	4974970.13620288	5310405.856378906	10109267.05188638	4155005.2234892994	3.32470265425194	1.733225318533068	0.838192812142366	0.583333333333333	0.373316446802755
Com_3467_pos	PC 17:0_18:0	C43 H86 N O8 P	775.611	11.172	776.618	No results	Full match	No results					3457767.5230740723	2791468.6844488583	2508808.7039496703	2784455.706145644	3308997.8346348736	2498474.571798507	113407788.02961013	2960162.445013643	2826627.0702782585	3157562.7432732447	3213604.661214203	3149417.826409302	0.134793544520256	-2.89118	0.320370048478252	0.722222222222222	0.512414880228631
Com_3487_pos	Artemisinin	C15 H22 O5	586.275	6.306	587.282	Invalid mass	No results	No results	Lipids and lipid-like molecules	Prenol lipids	Terpene lactones	Terpene lactones	112269738.60444136	79735292.69036576	56683625.57185165	104838740.32181394	125758277.30781408	53762006.469069526	39176441.294803165	38765675.82436332	28529391.134000883	45445339.80966677	36183719.12345863	24637172.6135794	2.50565640805814	1.3251885964731194	0.0008023648602321	1	1.28229368533759
Com_3536_pos	2-(2-amino-3-methylbutanamido)-3-phenylpropanoic acid	C14 H20 N2 O3	264.147	5.709	265.155	Full match	No results	Full match					70123419.73193009	62446900.728102215	92403394.86775476	50876683.2516324	41484787.695127405	85987478.88782541	93190599.75383326	52874805.724271536	73603447.4478766	61379221.60285793	95455941.84086417	98812281.23177834	0.848535316793469	-0.236953	0.312439742368237	0.722222222222222	0.496223704730562
Com_3549_pos	3-Indoleacrylic acid	C11 H9 N O2	187.063	5.506	188.071	No results	No results	Full match	Organic acids and derivatives	Carboxylic acids and derivatives	Amino acids, peptides, and analogues	N-acyl-alpha amino acids	91823172.7893564	58191786.40180673	42034026.197777286	41801071.25755888	76055710.68709348	30944290.47768911	102021867.53362028	99589523.26873986	97336824.26108508	101276448.15273131	97917798.37562786	93529290.14868596	0.576079653640082	-0.79566	0.0137296699853651	1	1.18688714375953
Com_3577_pos	PC O-36:1	C44 H88 N O7 P	773.631	11.481	774.638	No results	Full match	No results					2853118.9808266847	2670697.844817932	2197724.0770266675	2616466.827797279	3080620.248723376	2273956.40736814	2927640.50721136	98608887.55874422	7560489.3490346735	2722944.1336005647	2744262.884215907	2708170.2775218496	0.13381311454688	-2.90171	0.216848781193037	0.805555555555556	0.615249876535907
Com_3622_pos	4-(2,3-dihydro-1,4-benzodioxin-6-yl)butanoic acid	C12 H14 O4	239.114	7.21	240.121	Invalid mass	No results	No results					100518706.61112502	79962412.22041695	89665226.78612322	92804000.94829737	61735999.628775485	82792009.86107454	92589813.892595	78093616.68183275	89388550.13438173	79584660.69189355	88185638.62447979	104906662.1113405	0.952565675720789	-0.0701095	0.519379067246246	0.5	0.315632707902579
Com_3635_pos	LysoPC 20:2	C28 H54 N O7 P	547.363	5.301	548.37	No results	No results	Full match					12600395.951644037	9687424.15736976	66877947.97738913	16014398.578973202	10571562.108799543	89246346.44976357	44216396.68331828	31017452.25226461	31840204.42805364	36797863.545526326	43594930.04441993	9475537.615119709	1.04090379362918	0.05783673254888315	0.562714679440939	0.555555555555556	0.488423910260512
Com_3656_pos	15-epi Prostaglandin A1	C20 H32 O4	168.115	5.791	186.149	Invalid mass	No results	No results	Lipids and lipid-like molecules	Fatty Acyls	Eicosanoids	Prostaglandins and related compounds	25626971.73837861	12359280.009881131	64015532.46372796	33300470.716003813	14258341.376424404	87870492.03034835	63785961.85252491	45362475.41364436	42339242.02564323	55402533.13212103	45719497.18780788	105652833.54806824	0.66272931085864	-0.593508	0.126675749774286	0.722222222222222	0.740289818772752
Com_3689_pos	Cer 13:0;2O/2:0	C15 H31 N O3	273.23	5.801	274.238	No results	Full match	No results					96974878.88254929	101501809.71164931	54425716.32865624	84365335.24215843	98778619.6657288	52373756.68610069	47425465.7827165	30009662.3281904	32222023.827576555	34970791.57465576	29121853.74300821	62235569.81634418	2.06970509475194	1.0494252176528491	0.0018981571465999	0.944444444444444	1.21648589160384
Com_373_pos	(5Z)-3-aminonon-5-enoic acid	C9 H17 N O2	171.126	5.495	172.133	Full match	No results	No results					154240839.2904035	112742704.20760244	851155536.0164104	309337750.9917589	223819209.54198423	761715132.8571723	337556960.1862501	382509848.7539648	348623514.10650045	415003083.8411349	492827321.9076178	346515150.330626	1.03873177103622	0.05482315900148557	0.523658847151154	0.666666666666667	0.463966747644246
Com_3829_pos	6-cyclohexyl-5-(cyclohexylimino)-4-thia-6-azaspiro[2.4]heptan-7-one	C17 H26 N2 O S	306.181	6.987	307.188	Invalid mass	No results	No results					112352926.82060362	30664290.83960335	36277791.533747055	70826106.26426065	104155940.3920108	47813931.283619925	4303102.288136518	419667.0446152893	9790086.956096947	13005461.955777109	5396880.471897799	7268191.730200745	10.0064	3.3228507977535724	0.00243005450158764	1	1.24838099484027
Com_3901_pos	P-Aminohippuric Acid	C9 H10 N2 O3	194.069	3.753	195.076	No results	No results	Full match	Benzenoids	Benzene and substituted derivatives	Benzoic acids and derivatives	Hippuric acids	52947045.988821685	25204092.00676776	20394312.949477646	92482528.6663728	27938820.42358459	24636305.04357159	691510.336397053	592397.2344067957	611922.3725537967	522697.4832176005	754451.8729898381	913082.547048605	59.618066055579	5.897677671536827	3.36981385238269e-06	1	1.47940354667313
Com_3902_pos	Dopamine	C8 H11 N O2	153.079	1.609	154.086	Full match	No results	Full match	Benzenoids	Phenols	Benzenediols	Catecholamines and derivatives	66926235.53805938	63338908.57157861	45960077.65312313	77194990.10389373	76250895.59028403	82426978.37190948	50698635.35830707	32150868.553448867	51021845.72198255	35591720.65873556	49666556.69577001	54854909.3487652	1.50409249857063	0.5888932924980564	0.00842151159461393	0.888888888888889	1.08923537068684
Com_3904_pos	Kinetin	C10 H9 N5 O	215.08	1.454	216.087	Full match	No results	Full match	Organoheterocyclic compounds	Imidazopyrimidines	Purines and purine derivatives	6-alkylaminopurines	81971607.05325677	90539710.24586724	82279798.7132885	78022317.77943105	63041713.575430736	64193959.864312425	16719449.850479532	21257902.332310103	15491314.72882547	20305962.002484675	18124948.7549584	21345744.33594561	4.06241157768317	2.022336411717368	9.68373126904113e-09	1	1.48715011402873
Com_393_pos	SM 8:1;2O/34:2	C47 H91 N2 O6 P	810.663	11.306	811.67	No results	Full match	No results					8300162.546833283	7769471.366049832	6393517.8290829975	7611704.984985308	8961998.774429414	6615289.419195499	996201769.333696	29877488.9789808	7110457.810201595	7921463.86698612	7983483.395996951	7878484.444213722	0.0431913951781069	-4.53311	0.242421179552538	0.722222222222222	0.589840798153569
Com_3945_pos	Ergosterol peroxide	C28 H44 O3	428.325	5.799	429.332	Invalid mass	No results	No results	Lipids and lipid-like molecules	Steroids and steroid derivatives	Ergostane steroids	Ergostane steroids	28453741.722762547	22083804.265713718	71842570.50081815	31661101.434486065	16785758.467311665	81342486.04979394	80317929.2846829	66446513.42967992	75738410.69220595	65201969.47526304	76241137.96522848	46052138.00978316	0.615050321316086	-0.701224	0.0566928999118815	0.75	0.941638587100843
Com_3950_pos	Cer 18:1;2O/23:0	C41 H81 N O3	635.623	10.068	618.619	No results	Full match	No results					11024435.498628192	9521160.70581206	7990895.64362475	8983528.491093844	11667924.094380848	8179470.049827041	9817871.639738956	79360621.19940676	9224720.225856015	9285076.275482714	11345887.818202604	96751783.37864426	0.265853322155507	-1.9113	0.157036837766173	0.75	0.720140138282937
Com_3955_pos	Cer 12:1;2O/2:0	C14 H27 N O3	257.199	5.768	258.206	No results	Full match	No results					14577396.807215312	8113302.071333732	68755559.35697429	27486076.21531472	14607352.726066304	78518510.06403361	50178623.82172714	68718145.6274322	81727922.22178657	90993584.00886938	68752949.99896777	24473425.50194449	0.551022851923055	-0.859816	0.0793975981935695	0.75	0.86300580161391
Com_3966_pos	5-(acetylamino)-2-hydroxybenzoic acid	C9 H9 N O4	195.051	4.567	196.058	Invalid mass	No results	No results					30543549.587796327	26035413.928461157	80848179.41923599	25468968.27485767	12850199.229292125	77910737.94460882	44682947.08503028	22240412.552211203	39997584.92760272	26120090.257238984	35752878.156340845	25774242.967974342	1.30369251407271	0.38260363894585814	0.78332164041524	0.5	0.397710213520543
Com_3975_pos	5-(6-hydroxy-6-methyloctyl)-2,5-dihydrofuran-2-one	C13 H22 O3	243.183	6.152	244.191	Invalid mass	No results	No results					88927253.38886863	47032669.674846806	51032310.2297586	82398842.95552817	108193322.2896676	80530608.39949681	69695343.41171329	50201787.52229103	40054930.39629677	73655649.07227246	53532500.75708424	36213351.92557175	1.41676189545317	0.5025973156920137	0.0859004578158878	0.805555555555556	0.782860227679914
Com_403_pos	5-Hydroxyindole	C8 H7 N O	133.053	4.837	289.095	No results	No results	Full match	Organoheterocyclic compounds	Indoles and derivatives	Hydroxyindoles	Hydroxyindoles	15446236.71417426	10584141.164692588	2415278.120296014	3856593.05932965	3070963.84086954	2557135.4710077625	643507254.7854486	869175748.6237015	761940745.9812996	610302908.4148608	503275693.5982535	596035940.0097561	0.00952010035446824	-6.71481	1.04138675148231e-05	1	1.4822814440284
Com_407_pos	4-[1-(acetyloxy)prop-2-en-1-yl]-2-methoxyphenyl 2-methylpropanoate	C16 H20 O5	287.173	5.646	288.18	Invalid mass	No results	No results					104158117.45016092	92039931.88734646	78422707.31957059	76180750.89703864	70182564.38531986	64290039.95915967	611413860.7240591	678072593.323563	843966842.3271441	679476686.0246426	509237460.22906095	410690196.2415664	0.130000701565863	-2.94341	6.17694690769157e-08	1	1.4829337689631
Com_4073_pos	7-Hydroxy-3,4-dihydrocarbostyril	C9 H9 N O2	163.063	5.424	181.097	No results	No results	Full match	Organoheterocyclic compounds	Quinolines and derivatives	Quinolones and derivatives	Hydroquinolones	86463392.84230144	84173634.49589312	52613168.97774211	88412431.44850695	73938166.70190993	66723384.32153309	76085383.32366219	48735196.04149057	48348454.13056159	47834835.591538265	55392909.86607116	64362700.28615559	1.32740013512581	0.4086033262059042	0.0305067639130638	0.861111111111111	0.963554733466787
Com_4075_pos	4-(pentyloxy)benzene-1-carbohydrazide	C12 H18 N2 O2	222.137	2.838	223.144	Full match	No results	No results					48085795.58192262	39210072.303902976	78820651.24183366	55643494.573691	62909903.0929821	56727962.482826434	28515968.275652915	30941704.12068875	25862517.87355235	40107861.579666354	42914286.660978965	46497606.11020441	1.58908009346133	0.6681918418213656	0.00719195439732463	0.916666666666667	1.10600534242245
Com_4118_pos	Lithocholic acid	C24 H40 O3	358.283	5.777	359.29	Invalid mass	No results	No results	Lipids and lipid-like molecules	Steroids and steroid derivatives	Bile acids, alcohols and derivatives	Monohydroxy bile acids, alcohols and derivatives	104334758.81057627	81161422.9155008	39662209.404378384	60340808.90662511	76869232.36923437	35152453.34058434	22176363.014837828	10128120.274537813	9724649.448467731	5991039.699490441	8253706.186343289	74517561.88576517	3.03934939624891	1.6037625331231347	0.00924885085011032	0.916666666666667	1.13785181236491
Com_4120_pos	2-piperidinobenzoic acid	C12 H15 N O2	205.111	3.562	206.118	Full match	No results	No results					3811030.872235237	2777084.2446142016	4189842.300894188	3801167.9085081536	3331940.471473197	3669071.543785479	66069333.53393615	80683387.35423186	82509790.52846535	74917136.21586415	55186462.76507751	33187207.564391747	0.0549737738902548	-4.18511	4.97790372869159e-07	1	1.4884102251187
Com_4152_pos	N-Palmitoyl taurine	C18 H37 N O4 S	363.238	6.669	364.245	Invalid mass	No results	No results	Lipids and lipid-like molecules	Fatty Acyls	Fatty amides	N-acyl amines	93424961.52502698	65038557.78575224	67760719.71190885	43628399.03373302	64459069.38005896	51264456.92898521	87965323.27099425	81099163.00142285	69951164.69573389	52248196.926791504	55441701.82898352	91811589.71109416	0.879272734612464	-0.185617	0.374533631090439	0.666666666666667	0.478817
Com_4187_pos	(2R)-2-[(2R,5S)-5-[(2S)-2-hydroxybutyl]oxolan-2-yl]propanoic acid	C11 H20 O4	216.137	5.732	217.144	Full match	No results	Full match					10167729.462708842	24053357.38170421	5513828.5267018005	11250128.294183709	12306004.013759844	6700993.417581573	80538097.19121331	64789458.448203646	76011686.61146809	63276464.63724555	55155434.42850056	91095021.79965807	0.162444970360203	-2.62198	0.000111061980564208	1	1.43016077816929
Com_4212_pos	N-(3-methyl-1-phenyl-1H-pyrazol-5-yl)-2-morpholinoacetamide	C16 H20 N4 O2	300.159	5.291	301.166	Full match	No results	No results					49282949.6773746	87454638.88994312	35132413.094157495	20574749.19987198	24489874.804792512	21050142.86921735	11253191.846599285	11552583.20738564	11401089.810170649	12766691.88314392	11098225.82454862	11136734.063242318	3.43866304475443	1.7818477528293206	0.00528443257911291	1	1.24966874215871
Com_423_pos	2-(tert-butylthio)benzaldehyde O-(2,3,4,5,6-pentamethylbenzyl)oxime	C23 H31 N O S	369.213	5.778	370.22	Full match	No results	No results					1028535057.2413625	765012300.5535455	438098274.8623141	671897663.4053848	464577579.633259	479132758.1607276	419215222.84006166	445602724.3229922	384692944.7762514	387729099.7784613	364475688.63956094	547192620.5392404	1.50937	0.5939494716776106	0.0444090951186035	0.888888888888889	0.940080447378273
Com_4233_pos	Ala-Gln	C8 H15 N3 O4	217.106	1.451	218.114	No results	No results	Full match	Organic acids and derivatives	Carboxylic acids and derivatives	Amino acids, peptides, and analogues	Peptides	101061673.957987	35405459.46037595	21802094.73279636	34794492.69900887	38247659.87169832	12813604.71333941	41013368.18279348	15937105.984106217	21219303.620472085	15268121.716168305	18161072.20537821	44289227.944085866	1.5660260749602	0.6471082342781177	0.340690407432177	0.611111111111111	0.578913713548338
Com_4295_pos	6-(4-methoxybenzyl)-3-methyl-5,6,7,8-tetrahydroquinoline	C18 H21 N O	267.162	6.596	268.17	Full match	No results	No results					1053079.9071530346	1454500.9923780172	74014391.06756794	1661989.5936981875	1326469.0065718354	67408127.99432386	1143335.5672631152	2629089.118647286	2253782.8981335806	7969914.615224051	3354861.8522917214	1354893.7312955768	7.85413869732162	2.973453074980538	0.454421705914252	0.527777777777778	0.574848754176915
Com_43_pos	2-Isobutyl-3-methoxypyrazine	C9 H14 N2 O	166.111	5.745	167.118	Full match	No results	No results					6272804134.921024	7364075600.005375	5717374365.946609	7501859815.877072	6397308664.470633	5587198685.435671	3441958643.8261123	4455130445.793311	4470830718.852466	5258517642.408438	4137851255.2236967	5729458380.602442	1.41270744741215	0.498462733989926	0.0034154144522967	0.944444444444444	1.17868130798001
Com_4325_pos	D-Panthenol	C9 H19 N O4	227.116	5.127	228.123	Invalid mass	No results	No results	Organic oxygen compounds	Organooxygen compounds	Alcohols and polyols	Secondary alcohols	18314857.76128519	22821386.43860992	46793825.87286754	24615760.32605561	23822817.222526483	73130241.41900189	17915446.60406492	21059656.21170725	15501774.085311571	14162697.849422362	14723394.105164677	14540660.663635893	2.13984803289681	1.0975083433689432	0.0297541093842544	0.972222222222222	1.07011178030928
Com_4341_pos	HexCer 8:0;3O/12:1;(2OH)	C26 H49 N O10	535.337	6.567	536.345	No results	Full match	No results					38288068.19371728	58575769.59887318	47197848.6269955	22147037.9882723	99486083.13418569	25826924.23501346	19985851.177765258	34906322.94890342	42428842.56455939	10708808.11579226	64049832.96354499	11742155.37581174	1.58589302753161	0.6652954609192758	0.179934344634163	0.722222222222222	0.631586140876615
Com_4359_pos	N1-[4-(trifluoromethyl)phenyl]-2-phenylbutanamide	C17 H16 F3 N O	307.119	1.768	308.126	Full match	No results	No results					45901232.100064754	30966388.92482204	58821017.03711127	27651897.31733428	11316753.41954665	18614209.810080443	82049760.18752576	61368394.50833322	71089373.91539793	66021826.929853946	80923952.47726792	74625068.24588996	0.443203582495076	-1.17396	0.0110264376019201	1	1.15972262105512
Com_4367_pos	10-Undecenoic acid	C11 H20 O2	184.146	6.124	185.154	No results	No results	Full match	Lipids and lipid-like molecules	Fatty Acyls	Fatty acids and conjugates	Medium-chain fatty acids	97222205.28396632	64761942.53032963	66425178.04329517	52606259.313661546	69731520.80329932	59589907.652767606	31694258.07911257	18687017.93857857	25118256.22030561	23502502.720242675	14956249.830554033	35283024.77922312	2.74948681980245	1.459162370777453	0.000120732431210732	1	1.36162387743922
Com_4372_pos	Metanephrine	C10 H15 N O3	197.105	5.935	215.139	No results	No results	Full match	Benzenoids	Phenols	Methoxyphenols	Methoxyphenols	4350881.755700839	4021141.5167349135	3366478.551773404	3452631.0950799654	3917492.242735402	3242948.2035599765	72177245.71438415	59573678.822242364	66765818.66099803	65441750.74499392	73009404.64933142	86299614.07109585	0.052807202766299	-4.24312	1.60087159382363e-12	1	1.5098025988603
Com_4378_pos	2-(carboxymethoxy)-4-methoxybenzoic acid	C10 H10 O6	248.03	1.292	249.037	Invalid mass	No results	No results					3084857.09735359	639640.8492625686	2509393.628910998	10036098.574604644	12010775.530582076	72375995.48083441	12453353.604703736	5080905.056846865	5946473.216449795	1395299.1420047765	442283.5737903717	1686637.4578539466	3.72734456143573	1.8981481901689077	0.366576044474999	0.638888888888889	0.43788145770039
Com_440_pos	2-Arachidonyl Glycerol ether	C23 H40 O3	386.277	6.128	387.284	Invalid mass	No results	No results	Lipids and lipid-like molecules	Endocannabinoids	Not available	Endocannabinoids	844062053.6312042	643365475.1057367	663795473.5179929	503437541.355497	485909241.1801503	732970893.7049364	653560211.9078696	362575324.4274456	511996059.22178304	388799912.52754617	424300338.3446127	876868676.0880716	1.20367299013565	0.2674434987512566	0.220412653120172	0.694444444444444	0.588730706647492
Com_4400_pos	tetranor-12(R)-HETE	C16 H26 O3	248.177	5.923	249.185	Invalid mass	No results	No results					93872907.28253716	68230307.97965458	57559864.3835846	71598824.11689025	98104622.45520404	58330495.73012294	48015603.9178125	34266065.40234685	36804485.06563088	43154823.26114145	43087233.40821295	46161484.905671045	1.78018037771913	0.8320234304368738	0.000823058880282156	1	1.29661858201628
Com_4412_pos	3-(tert-butyl)-1-methyl-4,5-dihydro-1H-pyrazol-5-one	C8 H14 N2 O	154.111	2.436	155.118	Full match	No results	No results					11312237.044751754	10615603.132976558	54231040.77700488	17564020.035297696	18851174.2157191	71725026.45857918	39877228.64630609	31830539.419311453	41202686.90179363	27955396.23372117	33159385.613155	27962640.197486587	0.912426549508149	-0.13222	0.326825686509494	0.666666666666667	0.572784746700734
Com_4433_pos	Benzamide	C7 H7 N O	121.053	0.65	139.087	Full match	Full match	No results	Benzenoids	Benzene and substituted derivatives	Benzoic acids and derivatives	Benzamides	95422384.50315808	68110321.86626439	60078240.52598273	79055011.0061975	89111200.96938272	59901633.0809076	56301753.23623375	48596991.92764352	52231168.04502788	67605863.27774523	71989678.78648089	81891097.63344756	1.19297159219381	0.2545596890607392	0.157996139770085	0.75	0.725419465695092
Com_448_pos	UR-144 N-(2-hydroxypentyl) metabolite	C21 H29 N O2	327.216	5.038	328.223	Invalid mass	No results	No results	Organoheterocyclic compounds	Indoles and derivatives	N-alkylindoles	N-alkylindoles	57336883.22537886	103463062.8132212	724485044.1837099	283328406.7480119	154828650.60505128	415278952.6781515	212898060.33942676	196324122.31062156	196754555.5604192	182638212.26890808	234641772.54827425	136616827.3717184	1.49906082404832	0.5840589214929939	0.842567297723962	0.527777777777778	0.412754641121564
Com_4499_pos	2-(3,4-dimethoxyphenyl)quinoline	C17 H15 N O2	249.137	4.853	267.17	Invalid mass	No results	No results					6391707.792334207	9027723.80808584	41926804.28925656	20265496.219078902	4836569.741416393	69777608.13004525	18858137.00720572	17421095.02135945	13098876.260720802	24320367.29445855	19498416.666817933	19603303.939261664	1.34951813136961	0.4324443601773454	0.753795674977439	0.527777777777778	0.40271022890596
Com_4509_pos	L-Leucyl-L-Alanine	C9 H18 N2 O3	202.132	1.859	203.139	No results	No results	Full match	Organic acids and derivatives	Carboxylic acids and derivatives	Amino acids, peptides, and analogues	Peptides	26858487.125485413	36694488.5903003	69573556.82955158	51258413.47526351	14097660.637735114	30198188.41954365	23987695.1604219	16098549.661075331	24410116.670950796	13254610.056755362	30961596.213035937	31252023.002878822	1.63384748833825	0.7082733212516353	0.153373024216824	0.75	0.707924305937744
Com_451_pos	Trigonelline	C7 H7 N O2	137.048	4.803	138.055	Full match	No results	Full match	Alkaloids and derivatives	Not available	Not available	Alkaloids and derivatives	878465367.6567191	676505754.8660959	517345108.4634296	790964947.2902311	776080552.0528197	718408085.6873246	492645983.57202005	394093671.5140616	420337705.7702981	419779337.7800648	384852817.5532453	464818670.674799	1.69133403555729	0.7581616176725029	0.000355965392550063	1	1.34348099397728
Com_452_pos	PPK	C16 H28 N4 O4	322.2	5.429	323.208	Invalid mass	No results	No results					539478865.0993338	610839234.0303181	713817693.4678065	578378220.9569293	440072620.6872796	526917979.4284468	360899348.2134277	196671191.9367621	330575724.7517839	339511937.62484103	232065406.25658777	417977106.853188	1.81578703425812	0.8605950051416715	0.00184018226560555	1	1.24442642966191
Com_4522_pos	Leucine-enkephalin	C28 H37 N5 O7	555.267	5.687	556.275	No results	No results	Full match	Organic acids and derivatives	Carboxylic acids and derivatives	Amino acids, peptides, and analogues	Oligopeptides	3569791.84349016	3546508.26472953	63017477.56918093	15040597.525280414	3560746.632482922	55334555.8391072	35334580.91519913	68987955.0967088	73413013.42968726	56140255.44023723	71397578.54611485	16640844.451698544	0.447540571981598	-1.15991	0.0549384242484333	0.861111111111111	0.942647489666526
Com_4529_pos	Prostaglandin A3	C20 H28 O4	349.223	6.472	350.231	Invalid mass	No results	No results	Lipids and lipid-like molecules	Fatty Acyls	Eicosanoids	Prostaglandins and related compounds	67686578.06606331	79801673.44110273	64594475.05360084	52944487.07123328	75883762.8657938	50999175.49356814	66375308.95924546	72438473.7477153	40186348.69223367	51830514.02171759	64628525.60997611	39863692.58861251	1.16875463772751	0.22497208976023558	0.225225176405713	0.694444444444444	0.575538073224396
Com_453_pos	Testosterone undecanoate	C30 H48 O3	456.356	6.054	457.364	Invalid mass	No results	No results	Lipids and lipid-like molecules	Steroids and steroid derivatives	Steroid esters	Steroid esters	102408544.46069984	105127155.7055288	614859467.566087	131703897.49450263	81230417.19394758	545059258.9270737	642815394.4746875	639573276.8287529	756351339.6854768	435622596.85437423	627206449.7903864	320669808.5434808	0.461799658979745	-1.11466	0.0300354769667058	0.888888888888889	1.03353060996023
Com_457_pos	16α-Hydroxydehydroepiandrosterone	C19 H28 O3	321.23	5.985	322.238	Invalid mass	No results	No results	Lipids and lipid-like molecules	Steroids and steroid derivatives	Androstane steroids	Androgens and derivatives	823105276.7060082	816578814.6058689	604667700.6616318	675020550.4296119	687902374.2374061	567203272.0208545	611999762.8083407	512201455.6998448	559058634.7729354	584179197.6659242	611367477.7274244	669570517.3502691	1.17644712907217	0.2344364855946434	0.0622643071564303	0.805555555555556	0.884388686460517
Com_4583_pos	Glycerol 3-phosphate	C3 H9 O6 P	172.014	1.291	173.021	No results	Full match	Full match	Lipids and lipid-like molecules	Glycerophospholipids	Glycerophosphates	Glycerophosphates	21330027.832572047	5715382.060132939	14478679.927009078	23088672.531404942	34173825.01089793	68037566.01656602	45793575.240746446	14579584.945446324	16462350.059140377	4706979.537533226	1642850.2306652972	5322468.598498142	1.88485237624456	0.9144515344223559	0.16243014801292	0.75	0.654602048861456
Com_4616_pos	4-Hydroxytamoxifen	C26 H29 N O2	774.441	4.772	388.228	Invalid mass	No results	No results	Phenylpropanoids and polyketides	Stilbenes	Not available	Stilbenes	580486.7875511047	538335.9925994099	493186.6159648896	585376.4132604444	483575.0237923663	510525.4732356079	27317862.585230768	24593520.65300981	19964667.500875928	21431488.56685738	16812144.5134859	80330636.05888115	0.0167575791337213	-5.89904	9.06855324257013e-06	1	1.48996861622184
Com_4618_pos	2,4-Dihydroxybenzoic acid	C7 H6 O4	154.027	0.81	155.034	Full match	No results	Full match	Benzenoids	Benzene and substituted derivatives	Benzoic acids and derivatives	Hydroxybenzoic acid derivatives	67641166.87302236	76873542.86084685	58415162.42398324	64648028.52186834	85848436.19914973	60254020.31147684	47094203.55759201	44193986.91787972	43803363.42710167	49802019.123004526	47178595.86259819	54843437.20204777	1.44181894748611	0.5278900134253315	0.000879039262469319	1	1.29249736694415
Com_4628_pos	Norfenefrine	C8 H11 N O2	153.079	2.724	154.086	Full match	No results	Full match	Benzenoids	Phenols	1-hydroxy-4-unsubstituted benzenoids	1-hydroxy-4-unsubstituted benzenoids	74998320.06605884	77659376.47645636	49454935.19724527	47247707.89847366	37104456.80008548	63670097.984509945	40122351.77964418	40157475.627857365	51668691.65885896	37490535.67680565	39500142.13199405	43134285.904861696	1.38901914854877	0.47406648796288486	0.0535103655491758	0.777777777777778	0.904840088803529
Com_4630_pos	Azetidine-2-carboxylic acid	C4 H7 N O2	101.048	5.088	203.103	No results	No results	Full match	Organic acids and derivatives	Carboxylic acids and derivatives	Amino acids, peptides, and analogues	Alpha amino acids	90088552.19872756	66423600.46156739	35428452.9842906	47256826.00693368	71880216.18501423	51835952.9634861	4243812.72346782	24552730.1660947	5853594.543140568	22470431.50043989	28434532.02016917	31897937.88103581	3.08986131309775	1.6275420849269455	0.0118563414303991	1	1.1156811181348
Com_4643_pos	N-Acetylputrescine	C6 H14 N2 O	130.111	1.517	131.118	Full match	No results	No results	Organic acids and derivatives	Carboximidic acids and derivatives	Carboximidic acids	Carboximidic acids	10217673.363429312	9155781.330581456	67093000.62249055	13348802.95011948	11360734.682824384	30419527.462206826	20302020.934678536	16917606.3795922	19613146.335406143	14895854.886454089	31812780.833424438	19506042.18969906	1.15073915483301	0.20256084591407975	0.718032135455719	0.694444444444444	0.399177604996289
Com_4648_pos	1-Monostearin	C21 H42 O4	358.308	10.726	359.316	No results	Full match	No results	Lipids and lipid-like molecules	Glycerolipids	Monoradylglycerols	1-monoacylglycerols	13998462.934743589	12545084.511040524	9163109.240501223	28720155.689448185	91391999.6362678	11785966.023643147	9629942.5888331	8029142.320450022	29054540.068886355	20814346.523923717	9932744.102612777	10825968.445439678	1.89841514424131	0.9247955145123291	0.374352584511645	0.666666666666667	0.477321641629893
Com_4680_pos	Hexadecanamide	C16 H33 N O	255.256	6.519	256.263	Full match	No results	No results	Lipids and lipid-like molecules	Fatty Acyls	Fatty amides	Fatty amides	18357831.389709476	19523724.24738496	40495219.01063502	74498336.23008373	30378423.82202118	44065934.74841887	35876744.10390383	31352203.299486417	37330188.72900238	23094757.18956884	19089945.546526343	9072644.08799404	1.45889231443981	0.5448733971987529	0.270254074690673	0.666666666666667	0.58396681652854
Com_4713_pos	AL 8810 Methyl ester	C25 H33 F O4	433.258	5.101	434.265	Invalid mass	No results	No results	Benzenoids	Indanes	Not available	Indanes	10389983.5402646	12005617.900547192	65767627.26459337	30424999.62093635	6928818.370170923	61963037.256926775	18313133.10634701	22012926.20281401	12448596.02786919	17098092.759177357	13953133.900836669	10152802.802308736	1.99492134151179	0.9963318630150089	0.410886722275311	0.555555555555556	0.602603910473251
Com_4721_pos	2-[(3S)-1-(1H-Indol-3-ylmethyl)-3-pyrrolidinyl]-1H-benzimidazole	C20 H20 N4	316.164	3.326	317.171	Invalid mass	No results	No results	Organoheterocyclic compounds	Indoles and derivatives	Indoles	3-alkylindoles	3930632.189288072	11131182.526203196	63631671.17515599	17334086.120113827	2662219.418027256	65637011.041757606	38843452.47190611	39019009.71990985	51735319.15748265	37464226.93653281	18681436.117495958	21534961.53849971	0.792783028815189	-0.335002	0.203267029463402	0.666666666666667	0.713215046577596
Com_4731_pos	Guvacoline	C7 H11 N O2	141.079	3.456	142.086	Full match	No results	No results	Alkaloids and derivatives	Not available	Not available	Alkaloids and derivatives	42713079.42202372	39324141.78419271	65462247.486331366	47078990.9433779	41093410.20569051	53102748.50165094	39232190.67762549	53317049.967358895	52549072.467793226	51611997.16950694	61437348.12768351	32382896.995688397	0.99395610193242	-0.00874596	0.999148121495633	0.5	0.41739461725161
Com_4777_pos	1-hydroxy-2-phenyl-1,5,6,7-tetrahydro-4H-benzimidazol-4-one	C13 H12 N2 O2	228.09	5.324	229.097	Full match	No results	No results					86631142.8875893	11843668.453524	13732702.67651396	19970043.157569025	14000392.919755204	15431153.739702804	12779403.617116503	6715134.110063394	6581676.379412913	7481551.661710284	6545660.771765315	6442512.477848427	3.47203445122133	1.7957812629781231	0.0222616497253799	0.972222222222222	1.04361869702248
Com_4903_pos	2'-Deoxyinosine	C10 H12 N4 O4	252.086	5.024	253.094	Full match	Full match	Full match	Nucleosides, nucleotides, and analogues	Purine nucleosides	Purine 2'-deoxyribonucleosides	Purine 2'-deoxyribonucleosides	83912351.3959338	33689028.2335716	25792788.86783389	47368502.86882555	57216766.79592173	49936716.45983469	2360215.941570216	2636197.725880288	2568042.5706791813	2577704.9550463697	2513101.3488926888	2122128.4294594293	20.1602674786044	4.333442874970042	6.61899461491598e-06	1	1.48394041534053
Com_4905_pos	4-{5-[(3S)-1-Isopropyl-3-pyrrolidinyl]-1,3,4-oxadiazol-2-yl}pyridine	C14 H18 N4 O	258.148	5.377	259.155	Full match	No results	No results	Organic nitrogen compounds	Organonitrogen compounds	Amines	Aralkylamines	75357868.94612458	67108310.84091114	36753819.29767506	70209138.01594596	72479319.86156699	37193270.91246587	17810397.7729234	18055439.81912846	21946808.65274999	23772342.945873037	15857743.20798024	25391653.267186917	2.92346256244231	1.5476781164325226	0.000201044547353357	1	1.36196886662333
Com_491_pos	PC 18:0_19:1	C45 H88 N O8 P	801.626	10.784	802.633	No results	Full match	No results					5625335.359723914	4534214.1177453175	3813325.665064837	4201860.681664662	6037201.458377558	3973095.277143448	49794614.00080629	720134336.2818668	20841618.989670243	4869465.044218629	4915599.244243722	4676055.2615295695	0.0350023886925523	-4.8364	0.122299431724065	0.833333333333333	0.761867855608131
Com_4984_pos	4-oxo-4-[(1-phenylethyl)amino]but-2-enoic acid	C12 H13 N O3	236.116	5.786	237.123	Invalid mass	No results	No results					21628479.83935664	70667216.71759059	48288847.54741669	55853105.3019274	65429401.32835623	41767946.91263972	35971736.545707054	38926518.00110708	45971217.26095501	40133963.40506628	35649588.65396709	56238031.468018524	1.20065534641106	0.26382207828515186	0.516952424844565	0.722222222222222	0.319037235630386
Com_5_pos	APK	C14 H26 N4 O4	296.185	5.212	297.192	Invalid mass	No results	No results					178891759.66041932	43665729848.73289	13627449807.924278	41145530207.02971	66798862116.16281	13281585737.21028	7574048757.755089	5215400130.032027	5181011048.636849	5068455658.186605	3994134568.701159	11747207855.652023	4.60796442842996	2.204129579817167	0.454543473353061	0.833333333333333	0.377903859118063
Com_5002_pos	D-2-Aminoadipic acid	C6 H11 N O4	161.069	5.003	144.066	No results	No results	Full match	Organic acids and derivatives	Carboxylic acids and derivatives	Amino acids, peptides, and analogues	Alpha amino acids and derivatives	59618822.34034561	68562974.78193888	49425847.59019742	55315660.72642961	58688824.311351866	60940244.99220517	24029918.78149036	22143902.366357543	22606030.07409141	22569605.589578506	18923329.95172733	33335750.19082334	2.45495415676596	1.2956960842450906	6.96675271967608e-06	1	1.44125933915113
Com_5125_pos	Tanespimycin	C31 H43 N3 O8	607.284	5.587	608.292	Invalid mass	No results	No results	Phenylpropanoids and polyketides	Macrolactams	Not available	Macrolactams	2945969.861443445	2905821.589476652	59016733.62850239	3249801.703409887	2969834.897834545	5935570.467597604	11765269.61300196	41241519.25116252	45649667.56298168	38211460.96042268	17727043.36519529	3085458.814881997	0.488480005059986	-1.03363	0.0863226543932372	0.777777777777778	0.833927938491118
Com_5130_pos	Lysopc 16:1	C24 H48 N O7 P	493.316	5.813	511.35	No results	No results	Full match	Lipids and lipid-like molecules	Glycerophospholipids	Glycerophosphocholines	Phosphocholines	8102007.836165967	10056396.90648399	5695651.9282396585	7626375.364334949	3605209.102737648	3776322.460434639	42045723.2396766	43440033.05526008	52526988.86228342	55376035.05316595	56624937.11146266	70226656.68800163	0.121352480050506	-3.04272	9.33833726594542e-06	1	1.45969457127432
Com_5154_pos	1-(4-methyl-2-pyridyl)pyrrolidine-2,5-dione	C10 H10 N2 O2	190.074	2.494	191.082	Full match	No results	No results					30097326.258498333	36716856.01260288	28066468.37733088	65744559.39466365	26368553.63954484	13477832.307178788	17759008.25863593	17000258.734504424	17227020.46886655	15644127.199005753	19385899.38384768	23125036.365772028	1.82013018037653	0.8640416393619571	0.0635727373440731	0.833333333333333	0.890980392690451
Com_5157_pos	β-Estradiol	C18 H24 O2	272.174	4.941	273.181	Invalid mass	No results	No results	Lipids and lipid-like molecules	Steroids and steroid derivatives	Estrane steroids	Estrogens and derivatives	6133182.305490616	6972043.692968173	16298744.86203672	11551093.389409965	5959847.970448824	15030824.666093811	29876529.9921422	63263985.36551426	20498401.06438688	55574358.50904363	24038712.282164264	18120319.900808297	0.293064582263472	-1.77071	0.00187895883579449	1	1.21351281812111
Com_5175_pos	α-Linolenoyl ethanolamide	C20 H35 N O2	321.267	6.181	322.274	Full match	No results	No results	Organic nitrogen compounds	Organonitrogen compounds	Amines	N-acylethanolamines	68475015.3698681	67193407.09110256	52204802.03379508	58364023.34049859	67547842.61783057	46524286.00679726	56109469.17097916	47734427.38271772	50659655.38033927	45755104.85514094	56429039.42108206	55792572.47436232	1.15306280929867	0.20547110119063938	0.110288296512583	0.777777777777778	0.798619861275441
Com_5199_pos	PC 19:0_20:3	C47 H88 N O8 P	825.626	10.177	826.633	No results	Full match	No results					11041198.252498148	9638342.950480437	7772543.846349328	9033224.41410962	11671259.490016006	8392076.68140829	70000383.72558966	16976956.313145194	9148700.265587362	9526420.614282168	9629595.347659891	9974953.762838436	0.459444510303181	-1.12204	0.244230481844715	0.694444444444444	0.594005263856334
Com_5202_pos	ethyl 1-(4-acetyl-2-aminophenyl)piperidine-4-carboxylate	C16 H22 N2 O3	290.163	5.167	291.17	Full match	No results	No results					21514999.51795428	32117916.89053013	57907290.71542731	29497943.710249785	21617134.18620732	52268032.23839198	25202147.10201623	26369429.06188287	28578042.026472583	27445715.395777676	25332332.4610286	24912452.28669213	1.36165202818808	0.4453580679993872	0.238031740635118	0.666666666666667	0.740664834987138
Com_5208_pos	5-Methoxyindole-3-Carbaldehyde	C10 H9 N O2	175.063	5.284	193.097	No results	No results	Full match	Organoheterocyclic compounds	Indoles and derivatives	Indoles	Indoles	16593118.517860085	17231133.813948184	57891899.4809444	10236448.651320048	15179799.868751314	10945054.09585955	6723738.877298009	5059032.7422033725	9136477.54625398	10230828.427141557	8893771.800550947	2852679.831290905	2.98573000528024	1.5780837107991237	0.01373054452681	1	1.07751
Com_5222_pos	2-{[methyl(2,3,4,5,6-pentahydroxyhexyl)amino]methylidene}malononitrile	C11 H17 N3 O5	288.147	7.277	289.154	Invalid mass	No results	No results					30460852.009509128	27199524.66511869	5420424.321938879	51341486.443915725	49891531.1169663	38581639.13570305	69712384.39532475	57865816.04660966	4669962.59489579	51873631.55589992	32388780.065449085	31549172.37986672	0.817929793591351	-0.289951	0.803739439027448	0.666666666666667	0.244029481605497
Com_5278_pos	Sphingosine (d18:1)	C18 H37 N O2	321.267	7.016	322.274	Invalid mass	No results	No results					59362793.91802962	62356397.81913758	57018440.60602043	38377435.77797957	54019596.48871478	52250272.4780449	56057355.89532405	44243048.15995061	48443887.6828662	30826838.49002149	59883721.23333738	61669638.41760991	1.07392439989771	0.10289243677625641	0.518512164943314	0.583333333333333	0.320783050339176
Com_5280_pos	JWH-018 N-(3-methylbutyl) isomer	C24 H23 N O	341.174	5.376	342.181	Invalid mass	No results	No results	Organoheterocyclic compounds	Indoles and derivatives	Naphthoylindoles	Naphthoylindoles	4529125.414372174	4643796.631928236	11231281.433970856	5400047.643733804	4091235.8822789984	7303043.379887378	68789352.9612642	41546767.13387473	36687892.41910853	46736527.99958976	44434397.89650867	31926839.64148387	0.137710223346131	-2.86029	2.33238936989594e-06	1	1.44603442344721
Com_5297_pos	SM 8:1;2O/36:5	C49 H89 N2 O6 P	832.645	10.725	833.652	No results	Full match	No results					7093858.58602393	6069488.60203029	4983168.847979349	5800477.152072492	7379828.956677911	5187229.255684322	68630526.71806818	6023887.544679173	5849900.770740814	6094390.640673532	6046468.050016681	5972763.800326216	0.370257706833458	-1.4334	0.371117059440724	0.611111111111111	0.470641905328857
Com_5317_pos	SPB 16:1;2O	C16 H33 N O2	271.251	6.414	272.259	No results	Full match	No results					37580025.9740987	24239236.26921437	22302932.86299281	55195082.76635083	77124087.52698468	31547753.85082304	25608464.348549757	20093356.1633048	14601210.317803454	21321809.478961445	17239561.992281653	12303846.9320385	2.23075492293517	1.1575320237176265	0.0120597359898007	0.944444444444444	1.0842978190044
Com_5325_pos	Cyclopentyl fentanyl-d5	C25 H27 [2]H5 N2 O	381.278	5.768	382.285	Invalid mass	No results	No results					2656104.765397127	2800211.187155649	28723646.79009244	5328578.376627617	2849545.1388420803	56421135.62818876	3515034.4482730944	34326613.46033382	41274593.16989924	58898839.37420242	42833413.51329728	2690594.195534147	0.538191743653887	-0.893808	0.294214092572254	0.694444444444445	0.617371393260061
Com_534_pos	N6-Acetyl-L-lysine	C8 H16 N2 O3	188.116	1.697	189.124	Full match	Full match	Full match	Organic acids and derivatives	Carboxylic acids and derivatives	Amino acids, peptides, and analogues	L-alpha-amino acids	357768931.8167224	232404469.80577144	360331172.4660067	407597760.9571852	281744399.89147824	617442136.2569343	445481719.9995354	216465594.37807304	265765775.1954244	212503859.98433447	210857195.6140297	251625419.85855263	1.4084292031064	0.49408704621597804	0.0944378351258718	0.805555555555556	0.773320193454196
Com_5357_pos	D-Glucosamine	C6 H13 N O5	179.08	1.307	180.087	No results	No results	Full match	Organic oxygen compounds	Organooxygen compounds	Carbohydrates and carbohydrate conjugates	Hexoses	6011726.616874553	64648598.478211805	5925065.365420317	4286024.114681158	3580388.080993565	3081951.721771444	14608865.319617745	23857400.42030384	14510278.587487696	14499431.367912982	12923509.088822324	20769140.451917466	0.86522629099393	-0.208851	0.120249985869501	0.833333333333333	0.761552778607308
Com_5373_pos	PC 19:0_20:4	C47 H86 N O8 P	823.608	10.539	824.615	No results	Full match	No results					8058373.924193807	6503216.267163291	5664272.886805237	6338892.286940345	8147845.537419224	5681995.135281638	7406480.460131854	60276744.1842716	6171600.118538975	6910059.463420888	6547572.6487070825	6710771.042858008	0.429623582728551	-1.21885	0.35461035104174	0.666666666666667	0.460255975572135
Com_5381_pos	α-Hydroxyalprazolam	C17 H13 Cl N4 O	324.079	4.704	342.112	Full match	No results	No results	Organoheterocyclic compounds	Benzodiazepines	1,4-benzodiazepines	1,2,4-triazolo[4,3-a][1,4]benzodiazepines	15089593.811353136	64291244.44446348	37360483.045922495	35159738.148342	35566970.110636696	22041896.196896467	774234.3081206799	656957.0579048813	673388.039431338	665837.9909753209	628510.6519931076	656064.2358927884	51.6671576830991	5.6911756152035196	5.51984037202968e-06	1	1.4914371796915
Com_539_pos	Obscurolide A1	C15 H17 N O5	291.108	2.498	292.116	Invalid mass	No results	No results	Benzenoids	Benzene and substituted derivatives	Benzoic acids and derivatives	Aminobenzoic acids	96287366.56846084	161951409.59809965	615814512.5770229	351878386.3636561	62853928.63193604	335376853.9022449	130116042.03430285	241247769.7119108	254915862.4081941	264104968.14131165	216251548.21979555	105115760.84580655	1.34034234961766	0.4226015402454695	0.870660396552029	0.555555555555556	0.464070074637493
Com_5401_pos	1,1-Dimethyl-2-oxopropyl N-[2-(2-pyridyl)ethyl]carbamate	C13 H18 N2 O3	250.132	6.96	251.139	Full match	No results	No results	Organoheterocyclic compounds	Pyridines and derivatives	Not available	Pyridines and derivatives	39408580.77649086	31155698.80939545	26567139.64679819	62365435.96798825	18412527.89313115	16666996.859824255	20176001.530588984	10621877.65011221	9994917.36870836	14969515.33364304	13473729.155818952	23574374.445743818	2.09649	1.0679779654373251	0.0206311377219803	0.888888888888889	1.00455393306492
Com_5409_pos	16-Heptadecyne-1,2,4-triol	C17 H32 O3	301.262	6.382	302.269	Invalid mass	No results	No results	Lipids and lipid-like molecules	Fatty Acyls	Fatty alcohols	Long-chain fatty alcohols	11191777.561287416	11150850.698806977	9226490.473409897	62261155.62403759	13775153.536196727	11071291.04305582	14120459.508207556	13764774.49940667	8030479.015307289	11918295.892273542	7382999.305876642	9389153.20617164	1.83692570979384	0.8772932811693116	0.293900071575062	0.611111111111111	0.515011919961317
Com_5465_pos	5-Hydroxyindole-2-carboxylic acid	C9 H7 N O3	177.043	5.248	178.05	No results	No results	Full match	Organic acids and derivatives	Carboxylic acids and derivatives	Amino acids, peptides, and analogues	Alpha amino acids and derivatives	73494349.46252243	25650746.819782622	5649786.542105409	822436.8224518301	49730923.51154178	5993415.257038781	9605537.754932549	5276311.93092485	5164833.065776467	5491668.221396433	5068797.192711624	10005515.333228445	3.97269335510421	1.990117438745956	0.429661644816719	0.722222222222222	0.457356951982943
Com_5474_pos	3-Phospho-D-glyceric acid	C3 H7 O7 P	185.993	1.331	187	No results	Full match	Full match	Organic oxygen compounds	Organooxygen compounds	Carbohydrates and carbohydrate conjugates	Sugar acids and derivatives	6639038.694285314	1181954.004625498	2553198.1797747365	12697157.828845048	16061044.765478294	54728500.05791283	23436381.754784796	7122640.32468658	6152397.437560475	2352010.807950902	337273.352978813	3388946.599322702	2.19354196453317	1.133262306742273	0.384264485851098	0.638888888888889	0.417847902358014
Com_5475_pos	2-Hydroxy-2-methylbutanedioic acid	C5 H8 O5	148.037	1.328	187	No results	No results	Full match	Lipids and lipid-like molecules	Fatty Acyls	Fatty acids and conjugates	Methyl-branched fatty acids	6639038.694285314	1181954.004625498	2553198.1797747365	12697157.828845048	16061044.765478294	54728500.05791283	23436381.754784796	7076372.536496026	6152397.437560475	2352010.807950902	390989.3463640038	3388946.599322702	2.19316021083411	1.1330112050500003	0.390769225601564	0.638888888888889	0.412344554813591
Com_5490_pos	5'-S-Methyl-5'-thioadenosine	C11 H15 N5 O3 S	259.134	5.105	260.14	Invalid mass	Invalid mass	No results	Nucleosides, nucleotides, and analogues	5'-deoxyribonucleosides	5'-deoxy-5'-thionucleosides	5'-deoxy-5'-thionucleosides	69682701.80790173	62849141.39142914	29659499.451504927	53312822.171098925	54793877.24914207	25224094.26926032	20723548.27307196	15567737.895700226	13577544.691463076	12321874.9645442	17534574.81852645	33578997.56503899	2.60821692713957	1.3830638644668423	0.00187306301431624	0.944444444444444	1.21794115049984
Com_5502_pos	4'-propyl[1,1'-biphenyl]-4-carboxamide	C16 H17 N O	257.137	5.262	240.134	Invalid mass	No results	No results					65303378.43250056	22634644.746838644	6942383.233959365	18028457.37573849	74068330.22125104	22892405.45718255	14809509.589250952	15203516.844165348	15004147.371988252	16801317.212375425	14605570.047398873	15455332.12698354	2.28418573714931	1.1916799673248093	0.197548232941431	0.833333333333333	0.710899657623789
Com_5543_pos	Pepstatin	C34 H63 N5 O9	685.463	5.475	686.47	No results	No results	Full match	Organic acids and derivatives	Peptidomimetics	Hybrid peptides	Hybrid peptides	34597822.07150817	62055233.78873649	30412973.699765265	42344121.53886584	47574446.76982585	27024852.92852098	3449695.8311364446	5641199.520651726	9127490.92820688	3963960.966235462	4818952.466483558	26753324.05254312	4.5393202241131	2.182476266078027	0.00137663898059031	1	1.29429886541385
Com_5566_pos	Vasicinone	C11 H10 N2 O2	202.074	3.899	203.082	Full match	No results	No results	Organoheterocyclic compounds	Diazanaphthalenes	Benzodiazines	Quinazolines	6355092.940484973	7273732.948637116	9176196.989401689	11285534.747581646	8997185.969155086	9657810.483163018	64504552.77911063	31319007.31086353	30955051.06733029	27910392.07972475	24561600.180455245	62136883.5587982	0.218509893529013	-2.19423	0.000100304456892316	1	1.40043810186659
Com_5590_pos	Nicotinuric Acid	C8 H8 N2 O3	180.054	5.069	181.061	No results	No results	Full match	Organic acids and derivatives	Carboxylic acids and derivatives	Amino acids, peptides, and analogues	N-acyl-alpha amino acids	71067732.53558718	31894862.883472838	12725545.98360495	35053713.733874954	48054520.98180892	9432542.99916102	18148835.474893924	7899540.534619459	4312102.185738433	9890248.376320636	9723320.23727307	4296964.446969605	3.83683506717775	1.9399167495956553	0.0107323056978412	0.888888888888889	1.08180569742169
Com_5596_pos	Pantethine	C22 H42 N4 O8 S2	554.242	5.433	555.249	No results	No results	Full match	Organic acids and derivatives	Carboxylic acids and derivatives	Amino acids, peptides, and analogues	Beta amino acids and derivatives	29378062.49649024	17476699.54806914	21843292.953965437	33970062.00227127	72259801.47445135	8609471.383982543	4533909.76723092	4428499.855611528	4385335.396350083	4738156.735941369	4563120.788983349	6337902.291845877	6.33173028521884	2.6625998018325214	0.00202729204077435	1	1.31361443149563
Com_5599_pos	ethyl 2-cyano-3-[(2-oxoazepan-3-yl)amino]acrylate	C12 H17 N3 O3	251.127	5.121	252.134	Full match	No results	No results					41404427.17136084	61172756.28680176	3500855.1780768083	34817072.22302825	43740725.53462003	13414131.365329092	6079025.202902516	4075007.912876916	4835242.685590953	4568397.343261485	3175769.690618657	6430827.212010939	6.79084261112216	2.7635905958935973	0.0128819908529602	0.861111111111111	1.14833830850128
Com_5623_pos	methyl 2,5-dimethyl-1H-pyrrole-3-carboxylate	C8 H11 N O2	175.064	0.698	176.071	Invalid mass	No results	No match					70737879.89866596	35482681.20514351	36694292.062201165	22988528.742935035	47639823.462319024	14223756.01150164	26466980.564667467	13505781.11263963	25535815.727335885	29745254.589835383	29686030.18086808	43052987.62689387	1.35581342688627	0.439158663263957	0.414365699740753	0.666666666666667	0.484420411388384
Com_5640_pos	p-Hydroxybenzaldehyde	C7 H6 O2	122.037	5.136	123.044	No results	No results	Full match	Organic oxygen compounds	Organooxygen compounds	Carbonyl compounds	Hydroxybenzaldehydes	63798054.43428923	41204579.9478651	29638241.2435442	46640897.19967654	71635213.21374719	33404691.409874894	21846112.719947323	18861209.974501863	20062528.1262983	21059687.1103817	21156084.378068704	25101243.72669992	2.2353710908092	1.1605143510638998	0.00246470742466034	1	1.29278803412027
Com_566_pos	TKK	C16 H33 N5 O5	375.252	6.225	376.259	Invalid mass	No results	No results					545085079.041563	684023406.1235818	521871506.5498901	447498156.1356128	719007145.6354125	233831936.20757312	486432272.6746175	439674899.89145416	284832966.71952486	445980107.2582046	551752780.0746646	358091582.0388111	1.22773908408459	0.2960039954861542	0.409249886989954	0.722222222222222	0.424613344727596
Com_5660_pos	Cer 16:1;2O/2:0	C18 H35 N O3	313.261	6.668	314.268	No results	Full match	No results					18890327.65239016	28443469.708295867	49021399.96141704	33425495.846453037	30298821.15096728	50959146.82437223	37223079.48042893	55693081.091925085	50031547.97120218	46259479.75831535	56779720.815642215	33051779.400889102	0.756306095991336	-0.402958	0.11023589548649	0.777777777777778	0.813554280040511
Com_5705_pos	Riboflavin	C17 H20 N4 O6	376.138	5.272	377.146	Full match	Full match	Full match	Organoheterocyclic compounds	Pteridines and derivatives	Alloxazines and isoalloxazines	Flavins	67905763.0645288	29337402.223889805	7937782.120050832	8004724.703608521	70470638.83019133	8848184.569768518	7051885.229407218	7239500.756070374	7144566.44190098	8000329.786107919	6954774.772493614	6978906.208565843	4.43865941616124	2.150124013131134	0.0583322354411576	0.972222222222222	0.947907937347151
Com_572_pos	isoleucine	C6 H13 N O2	131.095	5.548	132.102	No results	No results	Full match	Organic acids and derivatives	Carboxylic acids and derivatives	Amino acids, peptides, and analogues	Isoleucine and derivatives	786816540.155131	448810253.3176715	281243557.1985249	388752233.27756345	645701499.3466845	325786006.13002336	200320721.29091144	149183830.96907392	185574796.1506074	166926060.12614846	147946248.34823865	260801775.49829772	2.59023290457213	1.3730818257745059	0.00132986693835598	1	1.27855442056363
Com_5724_pos	Gly-Phe	C11 H14 N2 O3	222.101	5.808	223.108	No results	No results	Full match	Organic acids and derivatives	Carboxylic acids and derivatives	Amino acids, peptides, and analogues	Peptides	19615352.684135117	16756085.06280136	14136634.343756149	18520895.018990457	3877791.277769792	13055556.2937876	55276928.155047856	39467886.57894438	39088940.11707488	40434305.86146455	44160925.00516184	61286818.7581496	0.307320191800833	-1.70219	0.00261633807115375	1	1.27079690542609
Com_5731_pos	N-Formylkynurenine	C11 H12 N2 O4	236.08	3.14	237.087	No results	No results	Full match	Organic oxygen compounds	Organooxygen compounds	Carbonyl compounds	Alkyl-phenylketones	13979584.73324627	17444404.285106137	17372842.448476166	23783367.506822493	9104647.883451125	13142278.527348043	51662642.51746853	34269303.492421694	35071109.5215277	40060884.47732404	29196663.8019268	61161612.70082538	0.377162872478754	-1.40674	0.00023387813173744	1	1.31972077909146
Com_575_pos	3-(3-methylbut-2-en-1-yl)-3H-purin-6-amine	C10 H13 N5	203.117	5.593	204.124	Full match	Full match	Full match					123107810.23735224	123073833.0720988	39689506.89689262	94519042.53664316	26646453.13907079	22848679.19219373	645283902.6745834	485706453.090849	541898283.8716396	507779975.4127354	473404175.6544069	698722530.7429203	0.128216990260146	-2.96334	0.000631421961070443	1	1.38734978337212
Com_5751_pos	N-(2,3-dihydro-1,4-benzodioxin-6-yl)-2,5-dimethyl-3-furamide	C15 H15 N O4	273.098	3.573	274.105	Invalid mass	No results	No results					309794.7791023761	464383.8359253002	647883.9486455973	764421.2117675398	685121.3873899697	392011.16398324055	36136603.13420285	53969292.49476799	54233436.68506459	53768141.148223095	37448626.67200305	20689059.15854779	0.0127363043103761	-6.29491	1.74879780032327e-09	1	1.49238008784103
Com_581_pos	RKK	C18 H38 N8 O4	412.294	6.428	413.301	Invalid mass	No results	No results					267467295.9636898	346577644.7785476	397151207.09822816	216164704.00546104	296333607.336109	582306756.3658203	437426323.9089092	428040447.1528989	539715393.244813	219589550.4966169	425757820.4640029	577548980.2406799	0.801346384105589	-0.319502	0.273299622428592	0.722222222222222	0.528215322327133
Com_5819_pos	N-cyclohexyl-N-methyl-6-quinoxalinecarboxamide	C16 H19 N3 O	291.137	5.086	292.145	Invalid mass	No results	No results					44518546.78413802	58310282.405256	27927542.70873593	34585121.132851	23214885.000400733	11899400.076993711	14859328.527859274	13468386.501543242	11474806.491845788	13921250.356977344	13144473.58914797	14730009.36826546	2.45661844744287	1.2966738012378172	0.0172853278825228	0.861111111111111	1.1081382975284
Com_5824_pos	N-Acetyl-D-tryptophan	C13 H14 N2 O3	246.1	4.756	510.233	No results	No results	Full match	Organic acids and derivatives	Carboxylic acids and derivatives	Amino acids, peptides, and analogues	N-acyl-alpha amino acids	12450851.39751774	27064918.264170986	50490745.70828932	27764950.135412123	10170052.42985443	48541447.54216842	1202819.0627854243	994390.5555399506	1106267.8822438875	1067843.0007415577	972049.9208780417	1113121.2293800393	27.3341893711778	4.772634686173059	7.66343819189579e-05	1	1.46807940423553
Com_5852_pos	Lysopa 16:0	C19 H39 O7 P	410.243	5.747	411.25	No results	No results	Full match	Lipids and lipid-like molecules	Glycerophospholipids	Glycerophosphates	1-acylglycerol-3-phosphates	11016169.82250196	57898886.07278688	24820079.65381712	37604630.75030145	23973787.53080627	17877554.02203332	9216746.544484733	16308646.943746168	15617815.253083397	17376222.694795668	10292799.890920006	18951580.50030557	1.97337722970578	0.9806667672147318	0.062695907357754	0.861111111111111	0.861182019245522
Com_5858_pos	N1-(2-oxoazepan-3-yl)-N2-(3-pyridylmethyl)ethanediamide	C14 H18 N4 O3	290.138	5.713	291.145	Full match	No results	No results					15534281.20173939	14428007.496247698	9253092.520522917	56213596.83195101	9505455.449472217	42199109.465269886	5216290.235821018	3316870.8380365795	2738371.5650798534	4308830.47720197	2452600.804919551	11197383.899334664	5.03358851113464	2.331587283004668	0.003525857896718	0.944444444444444	1.17171980312299
Com_5867_pos	Isohomovanillic acid	C9 H10 O4	182.058	3.19	183.066	Full match	No results	Full match	Benzenoids	Phenols	Methoxyphenols	Methoxyphenols	23565001.0469089	34989090.992539845	50006675.03099477	28607625.15938721	17253469.39570104	28492737.771051653	50012414.36471132	28665565.23626004	37160312.71274374	31515805.878038928	29912637.64071706	30979333.88551875	0.878357990834062	-0.187119	0.360174946065223	0.75	0.504742070976543
Com_5875_pos	Gly-Tyr	C11 H14 N2 O4	238.096	4.618	239.103	No results	Full match	Full match	Organic acids and derivatives	Carboxylic acids and derivatives	Amino acids, peptides, and analogues	Peptides	8368335.722871776	6693048.534138158	5740346.217780329	6894632.511579352	7203306.074001174	4729153.087034239	37504513.77915088	53960260.97441753	52530113.92385085	54319374.408349626	54752697.28827441	40247838.61325161	0.135106794080041	-2.88783	5.17606207251043e-09	1	1.49265407156611
Com_5879_pos	Benzyl cinnamate	C16 H14 O2	256.11	6.32	239.107	Invalid mass	No results	No results	Phenylpropanoids and polyketides	Cinnamic acids and derivatives	Cinnamic acid esters	Cinnamic acid esters	36285348.44100914	42980603.23153806	22783796.80950481	41778281.51216819	39150315.40402802	22267306.92777261	45315395.79754091	51513153.17551507	31768030.36637577	55970312.17426504	45866769.87584395	49118157.64767489	0.734195373984303	-0.445764	0.0530568970204342	0.888888888888889	0.926111719030046
Com_588_pos	Gamma-Glu-Leu	C11 H20 N2 O5	260.137	5.401	261.144	No results	No results	Full match	Organic acids and derivatives	Carboxylic acids and derivatives	Amino acids, peptides, and analogues	Dipeptides	88548366.35664342	93624937.66987076	51095668.85900607	67474539.60519776	82966034.17985111	53101520.75569224	620310581.4018251	501519672.7928842	504164688.9455556	518583790.8959917	564283518.6103865	687015783.5112398	0.12862978669295	-2.9587	3.63443814186166e-07	1	1.49472184275597
Com_593_pos	Spiculisporic Acid	C17 H28 O6	328.187	5.038	367.15	No results	No results	Full match	Organic acids and derivatives	Carboxylic acids and derivatives	Tricarboxylic acids and derivatives	Tricarboxylic acids and derivatives	40364813.83340521	41361501.16712919	23403503.718026057	39931570.41135077	41995528.893021375	28923079.254424147	368127578.7866787	615689111.192065	542441045.1779022	623241657.7780085	554142069.5504098	360628663.6063792	0.0704833413472085	-3.82657	4.28490387830535e-09	1	1.49201704394545
Com_5964_pos	2-[(carboxymethyl)(methyl)amino]-5-methoxybenzoic acid	C11 H13 N O5	239.08	4.803	240.087	Full match	No results	No results					65590503.88085128	38941722.89081837	25969722.935392264	43550570.92801113	35166758.2531801	38037600.39450131	5526133.939548834	4257978.604404809	4285816.572233229	3567770.128606982	4046121.347247919	5353011.098344969	9.14518691073812	3.193012656298686	3.78189649808547e-07	1	1.47779117429952
Com_5969_pos	Melatonin	C13 H16 N2 O2	232.122	5.006	233.129	Full match	No results	Full match	Organoheterocyclic compounds	Indoles and derivatives	Indoles	3-alkylindoles	29906806.69140255	56445351.38292211	46543719.50772095	31854085.8819171	37060315.6528779	43320880.404820375	26845770.482670084	19941892.27105862	22160220.57900676	18760337.7507126	21045000.009031758	21967197.082309943	1.87523236954375	0.907069378337596	0.000712253502107905	1	1.32104719232266
Com_5970_pos	3-(2-Naphthyl)-D-Alanine	C13 H13 N O2	215.095	5.004	233.129	No results	No results	Full match					27126722.32938024	56445351.38292211	46543719.50772095	32440028.67171766	37060315.6528779	46569423.78778367	27142165.635220934	20217567.11145248	22160220.57900676	20192252.046016358	19823686.255686928	21967197.082309943	1.87208957407748	0.9046494653624115	0.00165972572631107	0.972222222222222	1.29044424518414
Com_5972_pos	7-Methylguanine	C6 H7 N5 O	165.065	2.044	166.073	Full match	No results	Full match	Organoheterocyclic compounds	Imidazopyrimidines	Purines and purine derivatives	Hypoxanthines	49105490.41185166	35311838.697036035	26992546.8112804	40633156.91107018	34894205.146093234	48883414.55087523	23574190.22449935	17051221.962479245	18363892.72069351	16490767.44190446	14986643.420625554	21912990.738093205	2.09842737497094	1.0693085334728791	0.000130156261860354	1	1.34500757667233
Com_5981_pos	4-{3-[(3,4-dihydroxyphenyl)methyl]-2-methylbutyl}benzene-1,2-diol	C18 H22 O4	324.13	7.147	325.137	Invalid mass	No results	No results					12282415.056291772	16490185.246504877	8428542.920545602	5640903.735518155	5308148.977558743	2540335.1597630666	58973599.31545666	37896759.55463427	44215357.97970827	40984263.278966695	51889677.27185197	56377436.189258754	0.174591990535617	-2.51794	0.000635712380739795	1	1.37487496112822
Com_5982_pos	Indole-3-propionic acid	C11 H11 N O2	189.079	4.982	190.086	No results	Full match	Full match	Organoheterocyclic compounds	Indoles and derivatives	Indolyl carboxylic acids and derivatives	Indolyl carboxylic acids and derivatives	65381644.32645525	36804445.410082765	22899429.99582769	42969241.54713309	58000652.66886664	22665891.74774235	22090477.360616587	16518515.107672667	16920069.3019711	19428466.84486423	17290472.95586253	23373249.423267294	2.15117293367175	1.1051235082672706	0.0113430077645091	0.944444444444444	1.15531176849685
Com_6059_pos	Paracetamol	C8 H9 N O2	151.063	1.242	169.097	Full match	Full match	Full match	Benzenoids	Phenols	1-hydroxy-2-unsubstituted benzenoids	1-hydroxy-2-unsubstituted benzenoids	38856747.568843804	37518532.853263736	47975795.58575807	41522229.97327793	27722413.15139177	20717272.87185141	15704518.279519407	31985669.26949143	34313207.74793653	52665176.72919924	46581770.43262602	29841424.52591774	1.01525983256339	0.021848999507252463	0.832727690602547	0.527777777777778	0.147930689578861
Com_608_pos	N-Acetyl-DL-phenylalanine	C11 H13 N O3	207.09	5.912	225.124	No results	No results	Full match	Organic acids and derivatives	Carboxylic acids and derivatives	Amino acids, peptides, and analogues	Phenylalanine and derivatives	430630860.69294894	554188848.601303	523094242.6446314	623274536.878154	582826395.0177859	448765435.0620944	167690361.01727366	415220406.1208634	429988421.9769576	501372805.705404	383015673.15772784	451546974.4346383	1.3465317063137	0.4292482008778274	0.0927474630936514	0.888888888888889	0.802794892888845
Com_6086_pos	WNK	C21 H30 N6 O5	464.231	4.976	447.228	Invalid mass	No results	No results					1621842.2045774877	1855309.489446168	1660206.2062931608	1747007.5020857751	1521789.173914699	1569339.824003698	38971740.96924151	51548684.22340691	46404733.4275191	50740651.685693234	47300571.39184196	29266013.69786967	0.0377527304530054	-4.72728	2.76602395087227e-08	1	1.50420650280703
Com_61_pos	2-Amino-1,3,4-octadecanetriol	C18 H39 N O3	317.293	6.378	318.3	Full match	No results	No results	Organic nitrogen compounds	Organonitrogen compounds	Amines	1,3-aminoalcohols	4598685605.476471	4820245374.449172	2328555789.082774	5348385148.312259	5042523100.179039	3354938370.7079945	4365788372.306635	3877572998.085023	1409501266.2768524	3719977932.562637	2765013454.3865047	2762716057.114137	1.34881293417689	0.4316902758998899	0.162039590715855	0.777777777777778	0.673104893364237
Com_6105_pos	Bisphenol M	C24 H26 O2	363.217	4.644	182.616	Invalid mass	No results	No results	Phenylpropanoids and polyketides	Diarylheptanoids	Linear diarylheptanoids	Linear diarylheptanoids	436539.893936058	388166.3752614544	1133235.934025443	589815.9788179925	362008.7954873464	1079882.628870932	32122779.93310166	51325743.491850406	34374773.107387654	42850632.36274061	40281838.79016507	24752647.26606984	0.0176761225639716	-5.82205	2.68466870222399e-07	1	1.48475300384559
Com_6139_pos	SM 8:0;2O/32:0	C45 H93 N2 O6 P	788.68	10.901	789.687	No results	Full match	No results					5290830.060781315	4920148.124752712	3763532.2960112425	4254419.983398223	5733145.926051199	3842058.2329036784	13933936.144645736	4804225.118249047	4437016.436794047	5135883.272094555	52508957.56397673	4693375.491671159	0.325143621535818	-1.62085	0.189177530507218	0.694444444444444	0.651548100126943
Com_614_pos	(1R,2S,3R,4R)-3-(Isobutylamino)-4-(3-pyridinyl)-1,2-cyclopentanediol	C14 H22 N2 O2	250.168	5.503	251.175	Full match	No results	No results	Organic nitrogen compounds	Organonitrogen compounds	Amines	Aralkylamines	7326104.876299079	7857852.331406528	21691594.26750906	7255095.010569023	7002045.16465248	27620004.22732601	666433997.6499331	409464132.4388143	512776616.0015572	447693214.7657849	422185562.41404974	318582196.9742088	0.0283575250945363	-5.14012	5.27263024758413e-06	1	1.46836922797083
Com_6165_pos	N6-Isopentenyladenosine	C15 H21 N5 O4	335.159	5.712	336.166	No results	Full match	No results	Nucleosides, nucleotides, and analogues	Purine nucleosides	Not available	Purine nucleosides	20762646.702434324	54232102.67629168	5527506.636330816	5896977.879498863	15032390.903819446	13270274.01601173	14544413.950038314	3558547.2914159857	3887645.108766464	4325019.228913698	2834240.8206595834	12771796.74806442	2.73657794562588	1.4523729492427977	0.0720963111258612	0.861111111111111	0.829368720497782
Com_6198_pos	FLK	C21 H34 N4 O4	406.259	5.111	407.266	Full match	No results	No results					11849382.490461094	51904953.607537545	46562201.88056006	25522323.623174764	7014215.099632593	34186040.66590078	54605211.19409982	18195901.62174691	12202220.008733217	5877552.464103546	18021549.94272356	53052493.83689353	1.09313818594928	0.12847578672110843	0.749395395793639	0.5	0.200706874678803
Com_621_pos	2-[({4-[3,5-di(tert-butyl)-1H-pyrazol-1-yl]phenyl}imino)methyl]phenol	C24 H29 N3 O	375.237	5.415	376.244	Invalid mass	No results	No results					731176029.7846879	289128592.11475927	94916725.05312978	177915040.26434466	304697703.7521895	104408679.73244844	148637456.73926017	43814657.01288682	55509313.81274624	27176816.877592564	41940428.10128574	127307310.4080112	3.83055009835056	1.9375515898458362	0.011845408035875	0.888888888888889	1.07529255966383
Com_6240_pos	Arachidonoyl ethanolamide phosphate	C22 H38 N O5 P	876.492	5.512	877.499	Invalid mass	No results	No results	Organic acids and derivatives	Organic phosphoric acids and derivatives	Phosphate esters	Phosphoethanolamines	36865569.24828763	41693161.60684593	46221970.91099093	32720426.33868522	52315212.5212365	35451508.43616828	4396682.178748408	7307869.990286203	17804956.12637782	5933161.885595327	8716334.704819843	5157623.625326943	4.97333	2.3142120509792887	0.000180721122495638	1	1.40645253422566
Com_6287_pos	Tryptophanol	C11 H14 N2 O	190.111	5.942	191.118	No results	No results	Full match	Organoheterocyclic compounds	Indoles and derivatives	Indoles	3-alkylindoles	18074694.353086364	21192717.23498128	22229532.526289564	31587395.839572843	9229420.412676526	20659570.437931195	12218333.703824686	25387248.14119639	14480386.161120286	51188069.560616605	8085315.017947147	16535744.89948656	0.961517159168183	-0.0566155	0.789613000420059	0.611111111111111	0.204569881926189
Com_6290_pos	Dl-3-Hydroxynorvaline	C5 H11 N O3	133.074	1.256	134.081	No results	No results	Full match	Organic acids and derivatives	Carboxylic acids and derivatives	Amino acids, peptides, and analogues	Alpha amino acids	46888654.47500519	52530115.38934784	45614788.69946235	38987287.158255085	39069552.36736512	26822367.440996863	26711535.70921909	21346060.162759457	25607622.572701205	25484339.80140294	21326026.991281424	36307353.21436449	1.5940048579162	0.6726560261169239	0.00432456207923413	0.972222222222222	1.14921822053763
Com_6291_pos	N-Acetylhistidine	C8 H11 N3 O3	197.08	1.448	198.087	No results	Full match	Full match	Organic acids and derivatives	Carboxylic acids and derivatives	Amino acids, peptides, and analogues	Histidine and derivatives	28353001.95066994	18750526.55269149	33216191.636176985	30145455.22959789	28495790.167914502	45599055.56665915	469531.8866574669	16954174.601150285	20974855.62271909	16909411.049146697	19217152.17916126	20036891.903127134	1.9517352366909	0.9647573568863547	0.142642413883889	0.916666666666667	0.731369821516583
Com_6296_pos	Proline	C5 H9 N O2	133.074	1.406	134.081	Invalid mass	No results	No match	Organic acids and derivatives	Carboxylic acids and derivatives	Amino acids, peptides, and analogues	Proline and derivatives	16112904.846742088	52530115.38934784	9887214.815120108	12987995.417736892	12486002.230805224	9094125.913758626	9252016.652269408	8017446.574319714	9360244.804610752	8900707.081502337	8931435.781214092	11347149.067660026	2.02652544735396	1.01900829161513	0.11701202101324	0.888888888888889	0.772869548881954
Com_63_pos	11β-Hydroxyandrosterone	C19 H30 O3	323.246	6.105	324.253	Invalid mass	No results	No results	Lipids and lipid-like molecules	Steroids and steroid derivatives	Androstane steroids	Androgens and derivatives	5793987419.522249	5103299650.675381	4196364425.527673	3815599577.879776	4915514872.651723	4122855174.426958	4749123931.684998	3741288996.40794	4127485348.7042313	3139934983.544795	4639187174.58218	5470581118.099737	1.08041022138818	0.11157919386388931	0.440528149619895	0.638888888888889	0.458185151008818
Com_6332_pos	Quinolinic acid	C7 H5 N O4	167.022	6.864	168.029	No results	No results	Full match	Organoheterocyclic compounds	Pyridines and derivatives	Pyridinecarboxylic acids and derivatives	Pyridinecarboxylic acids	45331196.084402144	36556483.496339634	32450433.33720715	50735020.11444345	35784820.21758578	35786084.52993528	30700248.300409973	27573438.47901208	32975275.60624777	36795762.69353221	26402265.810382828	32690408.06507792	1.26454700718184	0.33862066750144826	0.0254563004351129	0.833333333333333	0.978537852745281
Com_634_pos	N-cyclohexyl-6,7-dimethoxyquinazolin-4-amine	C16 H21 N3 O2	287.163	5.903	305.197	Full match	No results	No results					602037155.701901	620047131.6019459	464801056.1850115	594567725.3008878	482516930.382738	399645387.6165854	458437202.4876917	528155397.4452735	431227928.6702375	588424764.4351013	384786031.8546568	504735604.5181612	1.0924965523494	0.12762872694210098	0.393643918135364	0.694444444444444	0.441457317223434
Com_6357_pos	Isoquinoline	C9 H7 N	129.058	5.704	130.065	Full match	No results	No results	Organoheterocyclic compounds	Isoquinolines and derivatives	Not available	Isoquinolines and derivatives	51390686.5874195	41241140.32602415	30553082.35099031	39180604.22845691	56684661.79319163	31613564.235183343	49070181.94671731	48587383.061903566	40402522.050299816	46077195.70267904	43814825.045412585	49351633.70301475	0.903932049947484	-0.145714	0.288519327400912	0.638888888888889	0.687904759524198
Com_6363_pos	Nitrazepam-d5	C15 H6 [2]H5 N3 O3	286.109	4.989	287.116	Invalid mass	No results	No results					8507914.973081045	32108686.487266183	44897172.50210423	24493388.99803016	6255102.280516426	38876199.55375909	2138203.1596373245	2199571.4094547634	2364284.4381611785	2293470.965600617	2106711.7486442258	2033668.2305904669	11.8102564162364	3.561968382773727	0.00116970941610348	1	1.38632292937441
Com_6370_pos	16,16-Dimethyl prostaglandin A2	C22 H34 O4	384.23	7.139	385.238	Invalid mass	No results	No match	Lipids and lipid-like molecules	Fatty Acyls	Eicosanoids	Prostaglandins and related compounds	46852679.37794416	42388858.234418906	29364529.89418488	36643848.03721107	39326525.03980778	38469638.73843799	34005040.7020794	27955928.119183943	29712352.73628817	23206268.525107685	29968528.36527508	53344698.64211459	1.17585532484823	0.23371056445669938	0.192363647813449	0.75	0.677452463228892
Com_6409_pos	Adenosine diphosphate (ADP)	C10 H15 N5 O10 P2	427.03	1.453	428.037	Full match	No results	Full match	Nucleosides, nucleotides, and analogues	Purine nucleotides	Purine ribonucleotides	Purine ribonucleoside diphosphates	28157619.151605166	31812331.171554945	26766983.893219348	21425392.94858251	18906188.939229965	18604272.70024402	38626028.58489367	40890242.84187669	23123632.845975347	32366345.63748568	49314015.17214665	41239339.18875476	0.645828357764499	-0.630777	0.0123299407162025	0.916666666666667	1.05215400777009
Com_6499_pos	N'-hydroxy-4-methoxy-7-methylindane-5-carboximidamide	C12 H16 N2 O2	238.132	5.2	256.165	Invalid mass	No results	No results					25335760.90460344	34414972.32469617	43501297.1356653	26223235.06050619	13732723.471965384	36289613.913400434	39184949.714632176	40162590.169430375	42592122.26851819	40034591.02083088	34074812.88232433	33477727.394137427	0.782033330893186	-0.354698	0.129392068622851	0.722222222222222	0.794741419879074
Com_6516_pos	Muscone	C16 H30 O	238.23	6.824	239.237	Full match	No results	No results	Organic oxygen compounds	Organooxygen compounds	Carbonyl compounds	Cyclic ketones	57869811.60503605	35309193.07705899	37963863.15328578	38472842.701235406	50572749.02302092	37122045.90696328	47092175.18786755	31303323.09084916	28951935.564670645	28993388.10253667	35911893.3313462	37276943.32427915	1.22803858500964	0.29635589094223824	0.099561524405712	0.805555555555556	0.783950885727832
Com_6534_pos	3-methyl-5-oxo-5-(4-toluidino)pentanoic acid	C13 H17 N O3	257.103	7.212	258.11	Invalid mass	No results	No match					2915990.4855584893	2761249.5274261707	2442908.5488082645	2539300.544328876	3315201.5575542683	2448639.963791293	31565936.473903347	45508999.94705687	44792119.80687042	48181444.8557149	38890236.761983074	19413902.010117177	0.071920739072031	-3.79745	1.68246399210063e-06	1	1.48641697495708
Com_655_pos	(5E)-7-methylidene-10-oxo-4-(propan-2-yl)undec-5-enoic acid	C15 H24 O3	269.199	5.971	270.206	Invalid mass	No results	No results					658707073.9193683	467679787.0758775	3.8599e+08	588727360.3538606	679482729.2812846	366533068.0486655	542061838.4420482	329412399.1992947	368514258.6438828	417754207.2948018	383821488.1573323	600178092.099086	1.19130458442626	0.2525423185439922	0.273777114924007	0.694444444444444	0.6553641823922
Com_6616_pos	NKK	C16 H32 N6 O5	194.117	6.032	389.243	Invalid mass	No results	No results					3375996.526870224	2853177.831376903	2579723.2647437	2672190.000940252	3234573.369614737	2488981.619786902	10056323.370808927	37525124.431985	44861947.35999531	32068870.605977364	40720554.086600855	6496332.405632924	0.100184752482703	-3.31927	0.00144781265571164	1	1.3395685688122
Com_6648_pos	2-Deoxyuridine	C9 H12 N2 O5	228.076	2.2	457.159	No results	No results	Full match	Nucleosides, nucleotides, and analogues	Pyrimidine nucleosides	Pyrimidine 2'-deoxyribonucleosides	Pyrimidine 2'-deoxyribonucleosides	662291.0495836409	2665766.332956255	42087665.14601194	10951198.790768644	1787776.8013245557	21995378.314036373	8048820.164437757	14589895.91560757	19078489.02482009	16882448.14565266	15463363.42445678	9794108.529204022	0.955793276236556	-0.0652295	0.247460816005639	0.611111111111111	0.671694117399441
Com_6649_pos	LysoPC 10:0	C18 H38 N O7 P	411.237	5.049	412.244	No results	No results	Full match	Lipids and lipid-like molecules	Glycerophospholipids	Glycerophosphocholines	Phosphocholines	1098218.5192735346	1481317.2534316783	10724103.335829008	1862531.5060748623	928005.3753847608	4855946.574296694	24154513.35863551	38620454.19536501	42625073.19141474	47185485.66051291	44471974.43963808	25348439.03464142	0.0941976755457821	-3.40816	0.000535053884610719	1	1.36921066841881
Com_6676_pos	N-{[(2R,4S,5R)-5-Ethyl-1-azabicyclo[2.2.2]oct-2-yl]methyl}-2-furamide	C15 H22 N2 O2	262.168	6.209	263.175	Full match	No results	No results	Organoheterocyclic compounds	Quinuclidines	Not available	Quinuclidines	3166976.252132527	2910610.959003211	25463164.862067334	14112116.9983731	3007191.137280209	20810705.992066845	9033984.133122616	29614346.238111805	26520312.84122408	46903360.3680062	39302697.82872909	5197195.344821501	0.443698822337614	-1.17235	0.113892302144397	0.833333333333333	0.794541326087529
Com_6691_pos	LNK	C16 H31 N5 O5	188.116	2.102	189.124	Invalid mass	No results	No match					19789082.471518848	15874769.218916396	16694742.897699798	18952076.05067941	13149380.07309664	18876887.788828813	50398444.26914078	27546538.094217718	35429705.26052543	26433735.86865777	25207845.6519792	45893110.3939032	0.489958951692395	-1.02927	0.00127743266891666	1	1.28480510478409
Com_6702_pos	ERH	C17 H28 N8 O6	220.109	6.803	441.225	Invalid mass	No results	No results					40346561.3397001	48047403.00119584	38993162.08334447	42847967.582475066	54431221.28082582	39629319.3558536	19071134.9858332	26636092.02781564	22466708.240441464	26896023.036362965	26703883.862977445	12214076.181475747	1.97253332933183	0.9800496772504012	0.0014757093736501	1	1.2936987893811
Com_6715_pos	Ethylmalonate	C5 H8 O4	132.043	7.024	115.039	No results	No results	Full match	Lipids and lipid-like molecules	Fatty Acyls	Fatty acids and conjugates	Branched fatty acids	43502409.25713424	36259605.771739945	31394528.14721979	28276094.74606048	56558104.96452016	33819800.39287152	42622335.46690464	29924112.27805045	26811358.64736246	25042140.38643942	41326035.49669543	36906791.67464925	1.13412326545032	0.18157745226366448	0.406224367819494	0.638888888888889	0.473030415523853
Com_6733_pos	ELK	C17 H32 N4 O6	370.222	2.79	186.118	Invalid mass	No results	No results					27619435.113476608	10094820.089064533	21650827.52891104	12473754.090031642	7186554.112959321	31479762.80582043	49968478.06250896	23604921.94805846	18124122.37443189	11445010.972806957	22583550.765479848	24942704.98245076	0.73343095405587	-0.447267	0.290868560163033	0.638888888888889	0.50842395284224
Com_6766_pos	WNH	C21 H25 N7 O5	910.392	4.853	456.203	Invalid mass	No results	No results					1260571.3238470235	1049206.3272991937	1029217.0980590164	1258202.9337163894	1043650.0976311537	1072414.523745481	13005018.505508332	41554238.8177989	43172402.811795145	45966661.3250101	30689452.25342799	16698296.339460654	0.0351321386348895	-4.83106	1.7535154710083e-05	1	1.47523375009014
Com_6779_pos	DL-Leucineamide	C6 H14 N2 O	130.111	2.885	131.118	Full match	No results	No results	Organic acids and derivatives	Carboxylic acids and derivatives	Amino acids, peptides, and analogues	Leucine and derivatives	37475933.90106045	44257911.76995945	28429822.195529044	44483669.25790069	27494894.45621992	23506191.16478128	40578840.54335896	34345012.94456114	37004441.479240455	36708388.26300743	32304163.55006436	48732649.05897219	0.895394664473719	-0.159404	0.324401614830754	0.611111111111111	0.552626136557023
Com_696_pos	L-Adrenaline	C9 H13 N O3	183.09	1.629	184.097	No results	No results	Full match	Benzenoids	Phenols	Benzenediols	Catechols	288952584.71536696	448130635.06172574	493429928.16571015	327623018.1973414	168475372.58708557	456368257.4408026	151009724.04011765	79738736.99940293	155776235.78552186	126387871.7095706	132913361.22908254	130641765.49618693	2.81142384866043	1.491300969998817	0.000811824911002393	1	1.30640661155823
Com_6980_pos	O-7460	C25 H48 F O5 P	518.322	5.394	519.329	Invalid mass	No results	No results	Lipids and lipid-like molecules	Fatty Acyls	Fatty acid esters	Fatty acid esters	4022240.309199129	17743598.824653156	23460786.47758166	8808605.78060237	15675141.928788846	39127635.06050481	8608195.489275413	4888685.916743815	7913281.595607883	5648993.934746345	3996794.909841792	5882684.7916591	2.94645439809587	1.5589799379526117	0.0405841932374365	0.861111111111111	0.987813212841396
Com_7014_pos	N-Stearoyl taurine	C20 H41 N O4 S	408.3	5.028	409.308	Invalid mass	No results	No results	Lipids and lipid-like molecules	Fatty Acyls	Fatty amides	N-acyl amines	2049030.370721027	1863975.4931978316	38795993.06103542	2934831.07325225	1649229.676446956	22025922.395697866	3677473.611744515	3983404.069363153	3880418.8039140273	3918863.323927121	3941507.1324902414	3206624.047442093	3.06608677783043	1.6163985294082872	0.634783795572627	0.666666666666667	0.493773942967804
Com_7023_pos	Leu-Pro	C11 H20 N2 O3	228.147	6.253	211.143	No results	No results	Full match	Organic acids and derivatives	Carboxylic acids and derivatives	Amino acids, peptides, and analogues	Dipeptides	28873369.7977454	30984482.285337277	38727513.58476827	17741069.849566	24078153.17607064	22702198.00990318	16984856.868494872	8879348.020979926	7952709.883657578	5916116.219624598	9116078.21846995	10652003.65375026	2.74123926175163	1.4548282554449647	0.000247019474515134	1	1.32226216599898
Com_7056_pos	IPK	C17 H32 N4 O4	338.232	4.587	339.24	Invalid mass	No results	No results					14574233.431740751	7608377.332648239	38559894.82935765	32077459.599818718	3933236.8343882114	24330583.329543944	43306265.836385146	21844341.343634702	19254832.634396248	16839681.255829148	20653934.745699	23029847.33763942	0.83547023901218	-0.25934	0.337700397459179	0.583333333333333	0.516979088641661
Com_7057_pos	7-(2-hydroxypropan-2-yl)-1,4a-dimethyl-decahydronaphthalen-1-ol	C15 H28 O2	222.199	7.208	223.206	Invalid mass	No results	No results					23783915.8024896	21766489.677520737	16285501.304809611	13097815.9627853	20162674.36055783	16080345.99257034	46573421.760460936	13463716.72201504	24417372.511326514	15501394.88445622	15367273.322664378	36213539.35418653	0.733662073197801	-0.446812	0.372568598136921	0.583333333333333	0.523016646448292
Com_71_pos	Methyl palmitate	C17 H34 O2	287.282	6.474	288.29	Invalid mass	No results	No results	Lipids and lipid-like molecules	Fatty Acyls	Fatty acid esters	Fatty acid methyl esters	3393541820.307358	1584123991.0576286	1942288572.4961677	3858159482.790247	5680248572.930818	1707615257.720359	1861373892.69184	1471756796.653125	2645304159.4283414	2600769440.9913454	1381524934.3375826	1678632565.9012291	1.5607365786073	0.6422270595410354	0.167915822787342	0.75	0.689314006123415
Com_7112_pos	D-Threose	C4 H8 O4	120.042	1.282	263.074	No results	No results	Full match	Organic oxygen compounds	Organooxygen compounds	Carbohydrates and carbohydrate conjugates	Monosaccharides	3678604.256219246	854903.9743843591	2698566.009564701	6855664.861477749	9211069.291203888	38177131.23475853	9287501.966745451	3588265.0030851	5091449.978594074	1374495.1836159655	482849.4458472659	1648756.7819673046	2.8628989053941	1.5174767268298737	0.275160290548521	0.666666666666667	0.520861383937499
Com_715_pos	2,4-Dimethylbenzaldehyde	C9 H10 O	134.073	6.246	135.081	Full match	No results	No results	Benzenoids	Benzene and substituted derivatives	Benzoyl derivatives	Benzoyl derivatives	517693307.6600348	360189578.45827675	226596845.17688197	422946678.1125958	523542910.6638342	264445270.48002157	470827914.6682737	429056595.8429972	246146145.31193823	537331920.8979063	415120449.67344326	286450727.28532225	0.9708506942715	-0.0426787	0.829183209414912	0.555555555555556	0.297004328895252
Com_717_pos	N-Benzylformamide	C8 H9 N O	135.069	5.149	136.076	Full match	Full match	No results	Benzenoids	Benzene and substituted derivatives	Not available	Benzene and substituted derivatives	587747338.6386039	430594690.3928222	319509229.4936964	450001520.3283541	653026484.6460375	331645596.0112017	138101153.60083	123343120.26152714	113698015.66573504	123722677.4940677	129592954.33142284	176898086.43452016	3.44260778177518	1.783501823219607	2.49785240168391e-05	1	1.42430511782353
Com_719_pos	HKK	C18 H33 N7 O4	411.26	6.263	412.267	Full match	No results	No results					578132635.408589	521685345.78286016	409364570.0231748	533889892.18442607	548838121.0543846	394807029.7759435	565446793.2344428	504574910.3536798	478792103.9506005	523739620.82316506	486061826.9642887	533724320.6185937	0.965843989923674	-0.0501379	0.557709107206212	0.527777777777778	0.531897810289639
Com_7199_pos	1,4-Dihydro-1-Methyl-4-Oxo-3-Pyridinecarboxamide	C7 H8 N2 O2	152.059	0.543	153.066	No results	No results	Full match					45183814.960848406	35853609.293966964	33041546.85171457	42002183.33981712	50093043.44703461	29721563.17838564	32267402.25713702	28171991.066177472	29940911.38660074	35247840.51668755	36877932.66370965	39624979.62011674	1.16704362000182	0.22285848493920823	0.170258114613724	0.722222222222222	0.726358073345368
Com_72_pos	2-morpholino-1-phenyl-1-ethanol	C12 H17 N O2	189.115	5.189	190.123	Invalid mass	No results	No results					22776660.561107434	10310377.723987369	94158556.6288863	25852387.82108985	61421874.76867404	65831036.90528107	3306928880.7374578	4443184956.988931	4413073101.623813	4190405231.3549314	3874712411.6041183	2659409380.585916	0.012248968807611	-6.3512	1.95005797482285e-05	1	1.46764536539307
Com_720_pos	6-Keto-prostaglandin f1alpha	C20 H34 O6	370.236	7.781	388.27	No results	No results	Full match	Lipids and lipid-like molecules	Fatty Acyls	Eicosanoids	Prostaglandins and related compounds	167227324.56293646	121466518.91331816	140244329.15789446	134661881.91418734	648224600.62264	249027323.1533199	17929438.067822896	17869486.264094867	11653781.498024324	13770608.796043357	22222200.22275761	21292397.095149346	13.9476904896373	3.8019543499176183	7.03578473685414e-05	1	1.4206138217747
Com_7230_pos	8-Hydroxyquinoline	C9 H7 N O	145.053	3.896	146.06	Full match	Full match	No results	Organoheterocyclic compounds	Quinolines and derivatives	8-hydroxyquinolines	8-hydroxyquinolines	34651155.14564751	31192053.09261285	27511340.99869168	33585758.35845136	27788353.85022811	25697666.638131887	32118466.219227124	26362895.660026893	29217460.73195629	31341011.22414524	35100131.56212637	44298299.9941427	0.909231532172921	-0.13728	0.345000653104677	0.666666666666667	0.559299528724453
Com_7299_pos	Xanthopterin	C6 H5 N5 O2	179.044	2.09	180.052	Full match	Full match	No results	Organoheterocyclic compounds	Pteridines and derivatives	Pterins and derivatives	Pterins and derivatives	43436347.00785902	32495972.232283454	28526067.65403429	41035507.022548944	35713663.528864674	20085953.69305656	12574114.135535082	10817167.881606098	10045123.518959424	11525035.256484335	10137436.370919945	21158974.978681557	2.63964307260222	1.400342864356615	0.000128639801781225	0.972222222222222	1.33791067986646
Com_7311_pos	6-Ketoprostaglandin F1α	C20 H34 O6	352.223	6.563	353.23	Invalid mass	Invalid mass	No results	Lipids and lipid-like molecules	Fatty Acyls	Eicosanoids	Prostaglandins and related compounds	32560031.03009056	13721141.098695006	15951431.983377654	20881102.835301187	49788125.0717277	20445130.207411643	4151588.398186957	4458255.996644678	4084911.993386775	3898081.970910918	4375321.841499824	5038691.902977831	5.89640613234139	2.55983589772602	0.000272256544717219	1	1.41238068771053
Com_7315_pos	2-[2-oxo-2-(2-pyridylamino)ethoxy]acetic acid	C9 H10 N2 O4	232.046	3.76	233.053	Invalid mass	No results	No results					48905546.1058266	17720844.216206565	10904889.554942971	18295035.63161378	8291522.961978281	9688662.321948128	798411.6470660033	1725205.8414593278	1385369.5442705718	1553319.431190689	1121596.8334429844	1473969.0313039953	14.123641595399	3.820040211418877	6.82450571933028e-05	1	1.41596538611411
Com_7321_pos	8-Aminooctanoic acid	C8 H17 N O2	159.126	3.254	142.123	No results	No results	Full match	Organic acids and derivatives	Carboxylic acids and derivatives	Amino acids, peptides, and analogues	Alpha amino acids and derivatives	11444106.583480775	8855531.820980921	15654642.789748885	11649265.749702016	8905396.574558575	15875874.01850372	33789685.91934233	32866666.13815718	38651866.25200068	37142784.87593831	33313570.418182164	25238966.656833075	0.360117127505222	-1.47346	2.60071781341681e-05	1	1.41522116305565
Com_7331_pos	Adenosine	C10 H13 N5 O4	267.097	3.287	268.104	Full match	Full match	Full match	Nucleosides, nucleotides, and analogues	Purine nucleosides	Not available	Purine nucleosides	47655301.36027522	39256943.62188974	28609450.37622111	36792420.63859617	22938893.280730363	25508543.98900068	43993885.69435372	21700488.52122676	23232148.49182892	22409005.39984075	24469706.420923226	37975887.32940222	1.15525524936621	0.2082116449836882	0.388948793201338	0.694444444444444	0.457016908445693
Com_7346_pos	MMK	C16 H32 N4 O4 S2	408.187	5.577	409.194	Full match	No results	No results					33625331.88020247	25378845.19042656	9559465.698160036	25819575.78736901	49532180.96790539	15523704.174725626	6172606.167734353	4113701.798384437	7023294.036398531	4657806.094474299	8065356.372199623	14534360.316225927	3.57750481922404	1.8389537103945541	0.00233403635015379	0.972222222222222	1.21255493578349
Com_7424_pos	Corey Lactone Diol	C8 H12 O4	172.074	5.439	173.081	No results	No results	Full match	Organoheterocyclic compounds	Lactones	Gamma butyrolactones	Gamma butyrolactones	47337720.157881975	30651053.889657672	17820603.361847974	24923526.11066811	48767192.92487987	20536360.999625627	16043112.299152676	13900890.315774685	14352474.586082324	14688192.768652026	14046893.425844356	22136884.946926564	1.99684307934471	0.9977209639555102	0.012588258523133	0.944444444444444	1.12805640310472
Com_7448_pos	Muramic acid	C9 H17 N O7	251.101	1.303	234.097	Full match	Full match	No match	Organic oxygen compounds	Organooxygen compounds	Carbohydrates and carbohydrate conjugates	Sugar acids and derivatives	9003841.570466949	8700144.155359752	35634085.151673146	31492158.59833832	31887871.03790061	17580584.73235057	9872325.821054645	7668806.500360559	8245159.937280682	7706562.14236667	7317024.949947231	11837668.35512739	2.55090105992599	1.3510069431888092	0.0284837324543924	0.888888888888889	1.02381012748812
Com_7509_pos	Linoleoyl Ethanolamide	C20 H37 N O2	323.282	6.314	324.289	Full match	No results	No results	Organic nitrogen compounds	Organonitrogen compounds	Amines	N-acylethanolamines	34727360.99638014	35661968.8964199	35076432.76115289	22116337.68656332	33135256.20433741	31723829.759266768	35416963.10652057	30201469.574245285	28052912.07911349	20223992.29663049	33127229.594771706	36475819.005011946	1.04873503718217	0.06865022717325113	0.654133730042177	0.583333333333333	0.223850788236389
Com_7527_pos	2-Methoxyestrone	C19 H24 O3	300.169	4.946	301.176	Invalid mass	No results	No results	Lipids and lipid-like molecules	Steroids and steroid derivatives	Estrane steroids	Estrogens and derivatives	21210704.221938867	12689924.213488191	34983440.900798686	25917864.079469625	7116017.863895661	32647252.06495247	17525238.174577866	13278678.895617897	21999799.179203376	12459306.990215195	15938420.5647417	13156228.97530272	1.42611829415056	0.5120936559095025	0.400166886582193	0.666666666666667	0.533825798828003
Com_757_pos	N-Acetyl-DL-valine	C7 H13 N O3	159.09	5.257	160.097	No results	Full match	Full match	Organic acids and derivatives	Carboxylic acids and derivatives	Amino acids, peptides, and analogues	N-acyl-alpha amino acids	573859944.7001827	318963560.1160475	102837600.45417856	228632363.45897844	619788279.0425622	160608960.30227497	123834421.6356677	68170540.94193242	98037579.65311316	59305929.36090387	85199868.82716884	145497753.6089053	3.45608862591276	1.7891402136024908	0.0109507364579218	0.944444444444444	1.13013395882723
Com_7598_pos	2-(acetylamino)-3-[4-(acetylamino)phenyl]acrylic acid	C13 H14 N2 O4	262.095	4.865	263.103	Full match	No results	No results					46084578.24987866	23421699.496514708	19181425.20763947	26942196.802775186	25407809.197984487	21370584.368817884	14491729.650864778	6588984.418841694	7130698.857439219	6505392.993675996	8403348.744327882	11910910.294804504	2.95121116485379	1.5613071520773043	0.000163621105405159	1	1.32925952468072
Com_76_pos	RPK	C17 H33 N7 O4	381.249	6.62	382.256	Invalid mass	No results	No results					3666136995.83538	4607768323.736343	3485899079.2033734	3404648854.4042497	4539201657.672939	3289729776.793425	3244472814.0068207	3006831746.628335	3821056746.783356	3188765925.1868005	2810378965.477486	4405051544.47045	1.12291259970235	0.16724564200123979	0.222759137457308	0.777777777777778	0.622416696426403
Com_764_pos	LNH	C16 H26 N6 O5	382.197	7.373	383.204	Full match	No results	No results					206784725.0486874	92975458.73505208	151643645.82759857	505958644.3144156	272675508.13514835	156924070.9144985	97359827.59522337	80531803.58636706	72014948.01838274	73874299.15014581	80977187.3733177	91580247.05681346	2.79438845896522	1.482532589418552	0.0125487417980101	0.972222222222222	1.14334053292518
Com_7652_pos	Lysopg 18:1	C24 H47 O9 P	510.297	6.802	493.294	No results	No results	Full match	Lipids and lipid-like molecules	Glycerophospholipids	Glycerophosphocholines	1-acyl-sn-glycero-3-phosphocholines	33480078.656186134	37541300.63344871	34154952.74967399	37194696.489514455	30886334.59155638	19473190.70114754	24202465.93590214	23966125.61649123	21220835.32489309	23709735.5687119	22522687.86653508	23633818.57347641	1.38400508477174	0.468849243380344	0.0281404484587894	0.833333333333333	1.03374460271295
Com_77_pos	15(R)-Prostaglandin D2	C20 H32 O5	369.251	6.5	370.259	Invalid mass	No results	No results	Lipids and lipid-like molecules	Fatty Acyls	Eicosanoids	Prostaglandins and related compounds	4208477466.803708	4054202813.9095054	3807325687.6156793	3190107477.6123085	417271314.8600054	393227573.0824873	378695750.2045344	3343553915.432427	3712918137.903816	2751483344.4908705	4030952163.666903	4465694671.96845	0.860159290288721	-0.217324	0.610027765551268	0.5	0.249038604957483
Com_7727_pos	2-[(3S)-1-(2-Methylbenzyl)-3-pyrrolidinyl]-1,3-benzothiazole	C19 H20 N2 S	308.137	4.786	309.145	Invalid mass	No results	No results	Organoheterocyclic compounds	Benzothiazoles	Not available	Benzothiazoles	45186047.86594576	28130618.684171584	20754574.93827316	31924542.538783133	15050680.732263569	24766884.031838745	26370181.57845724	29097301.10167922	10605401.22585459	4763890.878246281	18085392.751717	27000534.795610297	1.43037856654698	0.5163970237870743	0.193934803039255	0.694444444444444	0.621322811249796
Com_7746_pos	3-(4-hydroxy-3-methoxyphenyl)propanoic acid	C10 H12 O4	213.1	2.54	214.108	Invalid mass	No results	No results					25084133.34071066	34840639.89650428	33603163.69735281	27337987.455064308	17471195.956747852	23547853.14398669	10636298.191546245	15222642.024131672	15133380.83433031	10444718.621598449	15207378.660320532	21140381.913462438	1.84411165757444	0.8829260109473148	0.00211320505508857	0.972222222222222	1.20409237340072
Com_7774_pos	Homogentisate	C8 H8 O4	168.042	1.312	169.05	No results	Full match	Full match	Benzenoids	Benzene and substituted derivatives	Phenylacetic acids	2(hydroxyphenyl)acetic acids	7145623.02390944	5863269.994844053	5486626.546110746	6029395.414252603	8186322.482041588	7463073.849460221	5778262.358675869	36188566.92996004	5147447.251319362	5570804.48785469	4943095.911256192	5552465.124785746	0.635864245729215	-0.653209	0.74586751343405	0.75	0.168153577370658
Com_784_pos	QNK	C15 H28 N6 O6	388.209	7.231	389.216	Full match	No results	No results					101789684.9421219	133761914.80651148	307797838.5646146	220865509.02377155	62986333.55035327	316588596.51807094	253414936.9910303	375812046.479716	374998156.7994085	491571022.00077313	288659083.65966755	216748615.8204407	0.571550904566333	-0.807046	0.0520167435311173	0.805555555555556	0.940798600596793
Com_7861_pos	N1-tetrahydrofuran-2-ylmethyl-2-cyanoacetamide	C8 H12 N2 O2	168.09	3.573	169.097	Full match	No results	Full match					30504428.777537536	15681525.32599526	24045670.174492963	36929877.29982186	17742779.985486638	26571563.73734316	20744333.312194105	27783412.409033325	22722931.691713765	26524084.893887304	18799031.65068805	20522090.906481847	1.10488980359217	0.14390248931012004	0.661371128416558	0.583333333333333	0.237165308419614
Com_7900_pos	Oxytetracycline	C22 H24 N2 O9	460.153	4.734	461.16	Invalid mass	No results	No results	Phenylpropanoids and polyketides	Tetracyclines	Not available	Tetracyclines	1053645.3051999237	1409237.2238081235	21503905.87345911	3294302.162897604	1041203.8137446258	32736965.446745824	1031780.5390854088	903512.5268846224	852727.6740488862	900808.5312823716	822727.3472023517	936494.4987773182	11.2038706157219	3.4859253230112968	0.0682800854465201	1	0.969550871046773
Com_7914_pos	Sedanolide	C12 H18 O2	410.242	5.028	411.25	Invalid mass	No results	No match	Organoheterocyclic compounds	Isobenzofurans	Not available	Isobenzofurans	43710450.67331117	37207579.75530672	30067555.935573835	34676449.02923892	42735550.02497745	22922192.52178363	2539114.450436243	12193507.584810792	13347493.847605344	7364156.970487123	6579334.1801559925	14134377.456163444	3.76295160626901	1.91186473563363	0.00188364791147984	1	1.28133646895876
Com_80_pos	Tyramine	C8 H11 N O	137.084	5.92	138.091	No results	No results	Full match	Benzenoids	Benzene and substituted derivatives	Phenethylamines	Phenethylamines	637880682.2995131	786845628.4082065	2922083855.841795	1453074450.80221	644515420.7349885	2472443409.227898	2450820603.588521	2698704394.8074365	2655334387.669435	3047833208.593616	4070985366.6351447	1624018469.0470464	0.538857084117462	-0.892025	0.0385683248055464	0.833333333333333	0.990125685347559
Com_8030_pos	PC O-38:4	C46 H86 N O7 P	795.616	11.111	796.623	No results	Full match	No results					3146687.716605567	2608373.8541884413	2224052.9879204165	2588377.4694153466	3096291.271730398	2281541.5509703085	38362131.29187322	13793467.836062822	3908549.202821842	2963345.3186292923	3002152.1917010644	2974244.381306724	0.245298009031113	-2.02739	0.111162056190268	0.833333333333333	0.787404801216849
Com_8087_pos	Ne-(1-Carboxymethyl)-L-lysine	C8 H16 N2 O4	204.111	4.516	227.1	No results	No results	Full match					9869186.595495155	12884228.58610079	16869793.736288037	8778470.278183565	3168479.7459015846	16010429.02090344	32176644.63371171	25744838.83830997	33222009.08332572	31999108.712592	20898686.55067757	22539109.48886217	0.405693521297888	-1.30154	0.00854451200392867	1	1.17053623601204
Com_8181_pos	nor-6β-Oxycodol	C17 H21 N O4	606.295	4.941	304.155	Invalid mass	No results	No results	Benzenoids	Phenanthrenes and derivatives	Not available	Phenanthrenes and derivatives	1500111.510902549	1498040.0733108711	1535596.0237704003	1615882.2702450892	1407568.1657026762	1451549.8042049145	18610082.030000463	28757055.170504503	28403004.516259268	34548917.41547984	20606701.53999449	11628387.966081936	0.0631952695462616	-3.98404	1.12637787147817e-05	1	1.48288281161602
Com_8207_pos	2-Methoxyestradiol (2-MeOE2)	C19 H26 O3	302.189	5.056	303.196	No results	No results	Full match	Lipids and lipid-like molecules	Steroids and steroid derivatives	Estrane steroids	Estrogens and derivatives	10002016.017491488	13859771.153153311	30691011.4195262	13548315.218083443	8662584.035127576	26653354.05849155	7468911.814360104	3418926.1941182804	3395519.3049430437	3363531.350583262	3382966.363673317	5983906.184922625	3.82830998941512	1.936707653775107	0.000725396365614147	1	1.29587242778716
Com_8234_pos	Biopterin	C9 H11 N5 O3	237.086	5.097	238.094	No results	No results	Full match	Organoheterocyclic compounds	Pteridines and derivatives	Pterins and derivatives	Biopterins and derivatives	1289053.0404363032	1119214.6200667473	1406396.185837637	1163589.0364088514	1210154.6955107544	1305566.9644786746	25250546.39623025	21310030.026632152	25941820.14867931	16007087.277560756	12829348.294900144	36354139.32986762	0.0544252510678156	-4.19958	3.74186046100544e-06	1	1.4914197922281
Com_8239_pos	6-Hydroxymelatonin	C13 H16 N2 O3	248.116	5.002	249.124	Full match	No results	Full match	Organoheterocyclic compounds	Indoles and derivatives	Hydroxyindoles	Hydroxyindoles	19188675.790465105	35220788.3626021	25829830.49599365	18965521.77699416	18306701.16708005	11329371.256761769	3398288.002550017	2092984.1575649087	1960313.2154535188	1933393.2873024887	2565367.2500718045	10122758.901664527	5.83700797563532	2.5452290395070567	0.000206006512332106	1	1.34922004809071
Com_8242_pos	2-Naphthol	C10 H8 O	144.057	6.109	145.065	No results	No results	Full match	Benzenoids	Naphthalenes	Naphthols and derivatives	Naphthols and derivatives	36389216.86318041	33819557.20465109	23007705.188708548	33851305.226631455	41589597.71900175	20636033.10492845	32343706.04934088	27364145.39995488	25130448.4352437	31556304.7619753	22115416.978893824	31924354.714141637	1.11065	0.15140787265906894	0.531930749094823	0.694444444444444	0.503624424528634
Com_8246_pos	Oxoamide	C10 H12 N2 O2	192.09	3.906	193.097	Full match	No results	No results	Organic oxygen compounds	Organooxygen compounds	Carbonyl compounds	Aryl alkyl ketones	15953889.269240454	25840435.75416867	26795727.54509333	22426557.094196368	16298954.769316211	27948657.344597377	36855111.42479051	23150998.550191943	23106040.733632628	29373336.305220205	20663232.099028666	21121072.389925856	0.87680303745122	-0.189675	0.352454763535732	0.388888888888889	0.503656552544114
Com_8260_pos	1-[(5-methyl-3-phenyl-4-isoxazolyl)methyl]piperidine	C16 H20 N2 O	256.157	6.288	257.165	Full match	No results	No results					1150656.0060492358	4564643.241393058	8836531.540564701	5223958.966365892	5578772.534554703	16446986.167007333	7686350.435522906	26132097.615282767	23183317.66098918	34116737.29169579	21725571.525609825	7545432.484828549	0.347219201180867	-1.52608	0.0269290790158901	0.888888888888889	0.988769197862105
Com_8312_pos	2-Phenylacetamide	C8 H9 N O	153.079	3.929	154.087	No results	Invalid mass	No match	Benzenoids	Benzene and substituted derivatives	Phenylacetamides	Phenylacetamides	25207647.998733543	16538699.076943958	30148460.956601027	25234915.50860624	25900750.74916938	24591955.83987969	8693610.188191298	18614429.923770484	18696026.46481604	20621132.49523868	20585637.51798493	21804590.01452636	1.35414257163309	0.4373796418373531	0.0784609106389877	0.861111111111111	0.81937243246521
Com_8347_pos	Methionine	C5 H11 N O2 S	149.051	5.139	150.059	No results	No results	Full match	Organic acids and derivatives	Carboxylic acids and derivatives	Amino acids, peptides, and analogues	Methionine and derivatives	2309617.5848458344	32914287.77485229	6659079.798984415	17094546.871744867	4438963.325875551	2227335.9130458063	19563222.335785497	24451754.01563927	22393307.867266458	30591014.846300304	26066907.51735052	35658212.0820327	0.413571092726153	-1.27379	0.0271340547070038	0.861111111111111	1.04232568116889
Com_8360_pos	2-Benzyl-5-[(3S)-1-isopropyl-3-pyrrolidinyl]-1,3,4-oxadiazole	C16 H21 N3 O	271.169	5.037	272.176	Full match	No results	No results	Organic nitrogen compounds	Organonitrogen compounds	Amines	Aralkylamines	1827094.751131284	3898634.414896841	29845655.03668076	9230162.812178196	6291548.867523166	23800309.56451785	25606454.076385558	6545212.947089994	21703742.3790722	6433130.398650548	15593253.177381584	6912546.773771391	0.904571564565211	-0.144693	0.500254820734564	0.611111111111111	0.440339008313448
Com_8422_pos	methyl 3,4,5-trihydroxycyclohex-1-ene-1-carboxylate	C8 H12 O5	170.058	0.64	171.065	Invalid mass	No results	No match					33897165.987530485	30904802.67061945	28470370.413534597	30288060.072209284	37381159.72683587	29400896.289586704	24511899.516405545	22014180.9361639	22273496.37763845	25541843.785695206	26505733.771034937	28601626.907953907	1.27363002569244	0.34894625277731095	0.00205878277577055	0.972222222222222	1.20708580246547
Com_8443_pos	2,5-Furandicarboxylic acid	C6 H4 O5	156.006	3	139.003	No results	No results	Full match	Organoheterocyclic compounds	Furans	Furoic acid and derivatives	Furoic acids	12430310.112550251	22074313.47140922	19419577.93577654	16359894.56050682	20946857.26025833	29457592.57104912	12307460.361540653	20305998.780910537	22901703.240632184	20134329.56829316	22531095.6896929	11269445.326294694	1.10268167710408	0.14101637284748367	0.575115980698999	0.444444444444444	0.424442849621029
Com_8473_pos	lipoamide	C8 H15 N O S2	205.059	6.168	206.066	No results	No results	Full match	Organoheterocyclic compounds	Dithiolanes	Lipoamides	Lipoamides	13706461.143443638	14563721.854355784	8866034.920051517	13089353.91542568	15271231.4856328	9408744.420810858	35383039.51811525	22046593.29141062	17119786.52823338	22862602.42966763	19668874.20055124	19974117.07228523	0.546536358489236	-0.871611	0.0015995133698904	1	1.24299875392143
Com_8499_pos	Oleoyl ethanolamide	C20 H39 N O2	331.308	6.623	332.315	Invalid mass	No results	No results	Organic nitrogen compounds	Organonitrogen compounds	Amines	N-acylethanolamines	25182979.939336807	11282722.01332089	14604783.552850436	28956405.388157416	39764380.1773892	12773672.527372872	10766151.564347854	9891398.514724543	17954289.96633664	19880679.318372626	8629870.682184963	10452356.195388569	1.7088672541188	0.7730403319100777	0.0883027890563153	0.833333333333333	0.797627353670649
Com_852_pos	N-(2,6-Dimethylphenyl)-N-(methoxyacetyl) alanine	C14 H19 N O4	265.131	5.51	266.139	Full match	No results	No results	Organic acids and derivatives	Carboxylic acids and derivatives	Amino acids, peptides, and analogues	N-acyl-alpha amino acids	53144855.4750198	80477106.72589475	410847896.3134027	120330822.8664486	38230753.51256009	269924899.9040632	78197161.12523511	171165950.5437119	144245577.2292692	124275619.13508174	162427455.83679163	56776943.37715558	1.31999897058662	0.40053680448512463	0.99570842459884	0.555555555555556	0.489505920723098
Com_8575_pos	IMK	C17 H34 N4 O4 S	390.227	4.876	391.235	Invalid mass	No results	No results					4072862.317824641	18271121.649441227	2335658.436356211	4362344.988891976	2432688.7191852145	7075495.193222176	34490063.24332403	31074164.099630263	28453707.03609943	21366242.27707768	22012089.422755014	21242159.295979343	0.243006517581265	-2.04093	0.00238817303393147	1	1.28693321595414
Com_8577_pos	4-hydroxy-6,7-diphenyl-5,6-dihydro-2H-pyrano[3,2-c]pyridine-2,5-dione	C20 H13 N O4	331.084	4.874	332.091	Full match	No results	No results					33092180.183176428	18930701.995992854	17575966.38347343	32263986.32611855	25838574.88902837	23201632.90313102	15894755.993612276	9505555.249550411	12219861.538026083	14996578.143701935	13543244.97057156	14550290.209740492	1.86968786709818	0.9027974411418306	0.00124577514089106	1	1.24849168261996
Com_8586_pos	Diphenylamine	C12 H11 N	169.089	5.359	170.096	No results	No results	Full match	Benzenoids	Benzene and substituted derivatives	Aniline and substituted anilines	Aniline and substituted anilines	38474040.31103104	21307697.496782143	12195474.285457732	25711824.63334444	36742759.53774961	21154597.90518304	12733323.119655794	9935355.736981455	10143889.34386056	11093815.073869651	10088304.880098648	9433412.022717692	2.45295687140122	1.2945218682360877	0.0040471148619475	0.972222222222222	1.25548903275633
Com_8738_pos	5-[(10Z)-14-(3,5-dihydroxyphenyl)tetradec-10-en-1-yl]benzene-1,3-diol	C26 H36 O4	868.478	4.903	435.246	Invalid mass	No results	No results					832915.1470954703	677371.7834282734	716871.0029857749	830862.092739525	732879.4226910287	720576.1040762172	25997454.001072943	13016546.989389207	15153172.940885091	20607115.35881029	31062067.887551416	14741891.960900132	0.0374153347328023	-4.74023	1.15631998854228e-06	1	1.49672695103854
Com_8767_pos	12,13-EODE	C18 H32 O3	296.235	6.586	314.269	No results	No results	Full match					7633170.658936742	6947623.925040783	26681481.64302272	11015862.903916178	11117632.879473796	22052422.78417632	17153487.25928385	25808946.85784725	17516444.579320766	22106898.65815373	22865849.6342515	33051779.400889102	0.616939301507984	-0.6968	0.0488904141383429	0.805555555555556	0.922649313316475
Com_879_pos	1-Palmitoylglycerol	C19 H38 O4	330.277	9.802	353.266	Full match	No results	Full match	Lipids and lipid-like molecules	Glycerolipids	Monoradylglycerols	1-monoacylglycerols	124930048.24700488	90789354.06034584	77913658.43247339	159590538.48112696	542438013.7666461	93920672.21512644	90173158.68957572	69749826.2596941	172659725.70016417	136808808.7031232	76986548.35732731	87936479.68882096	1.71773182511902	0.7805048183328426	0.346108755307074	0.694444444444444	0.514506532320146
Com_8828_pos	L-Kynurenine	C10 H12 N2 O3	208.085	2.082	209.092	No results	No results	Full match	Organic oxygen compounds	Organooxygen compounds	Carbonyl compounds	Alkyl-phenylketones	25957993.06152189	20145643.344207123	17650830.894175805	30852494.525553	33324287.595269807	23338271.294746257	18137892.184995096	17039755.218371183	17443277.517335054	17189497.489468087	20087201.496460333	21390795.5797486	1.35925661819637	0.4428178526096859	0.0344065240179534	0.888888888888889	0.997454897548912
Com_887_pos	Agmatine	C5 H14 N4	130.122	1.168	131.129	Full match	No results	No results	Organic nitrogen compounds	Organonitrogen compounds	Guanidines	Guanidines	400375228.78067845	295875956.64482373	237304272.00346303	444101983.8218184	292359474.0456492	356092719.53329813	301606949.11971337	208787838.4586585	223577233.9162244	201527927.49862203	181977609.566759	226689742.38209072	1.50733441693584	0.5919995285027844	0.00738986536246693	0.916666666666667	1.10899572358455
Com_8880_pos	1-(4-Methoxyphenyl)-2-propanone	C10 H12 O2	164.083	5.371	165.091	No results	No results	Full match					36545426.930337496	22258813.481447987	14838187.696618175	26105350.74128725	32565938.329495456	15537291.176049026	9974194.330685431	9533554.720938332	9586243.383508734	10425511.8733301	9695278.657227356	9599381.893137118	2.51386734318383	1.3299085207288304	0.00227724502193402	1	1.32100264935927
Com_8886_pos	DL-Panthenol	C9 H19 N O4	205.132	5.016	188.129	No results	No results	Full match	Lipids and lipid-like molecules	Fatty Acyls	Fatty amides	N-acyl amines	16459627.103953552	5431156.259910089	20428531.037867427	26726771.44247406	7085133.018025306	22452522.9650284	28177085.699200217	24554484.94322554	28888372.78801944	27118974.94019951	13416338.840515165	21146460.096891385	0.687945292486178	-0.539634	0.135093625359953	0.805555555555556	0.719411197729438
Com_8919_pos	(2E,4E)-N-[2-(4-hydroxyphenyl)ethyl]dodeca-2,4-dienamide	C20 H29 N O2	315.218	7.101	316.225	Invalid mass	No results	No results					36263831.67545142	28164137.40119691	9577965.873058328	18096082.45637001	36059471.87220775	14662319.126732964	31460525.55920528	18185939.610896543	8675079.193449846	24564516.138040747	23813901.25964132	22513567.41403623	1.10533168869094	0.1444793595028658	0.838249920215112	0.444444444444444	0.368655100930944
Com_892_pos	Menaquinone	C31 H40 O2	444.303	6.879	445.311	No results	No results	Full match	Lipids and lipid-like molecules	Prenol lipids	Quinone and hydroquinone lipids	Menaquinones	313594126.5381666	300701388.8289091	88342231.92005654	179727626.6793171	305693841.4124504	74429572.32151484	272859051.3963368	425571881.5413972	260179628.85222164	141801217.80935657	276237985.90988386	217407279.14355832	0.791997244976532	-0.336433	0.30153958622984	0.555555555555556	0.59429056799357
Com_893_pos	Prostaglandin H1	C20 H34 O5	371.267	5.81	372.274	Invalid mass	No results	No results	Lipids and lipid-like molecules	Fatty Acyls	Eicosanoids	Prostaglandins and related compounds	526388865.6699975	338489125.7482896	344165918.27062064	247671999.74597424	365928315.7724245	354108949.79591995	309717597.82353973	219966296.91898635	175352193.09423536	161267251.6543407	249586388.00663468	372705204.1117801	1.46228710630477	0.548226598688867	0.0375679028667961	0.805555555555556	0.925307425610976
Com_8931_pos	Normeperidine	C14 H19 N O2	233.141	5.843	234.149	Full match	No results	No results	Organoheterocyclic compounds	Piperidines	Phenylpiperidines	Phenylpiperidines	19301956.4997603	13134692.664437903	19971606.67132969	16748856.508429367	17833736.0155877	19658755.139206696	23121539.71354015	28035275.00323251	23833845.746840145	29641344.047261864	30071701.823805865	16268320.96279449	0.706419628906549	-0.501403	0.0167981229865893	0.861111111111111	1.03299032633466
Com_898_pos	5,8-dihydroxy-10-methyl-5,8,9,10-tetrahydro-2H-oxecin-2-one	C10 H14 O4	180.079	5.349	181.086	Invalid mass	No results	No match					469748656.5044189	225157386.3143683	145344920.6453313	262680115.36627096	533008836.9475637	160087981.8657295	79599667.02593763	90271461.94687478	74084803.88424443	64487214.72557087	77159863.19191808	137143422.99537197	3.43575351569818	1.7806265398421528	0.00211796495971567	1	1.25973
Com_9026_pos	LysoPE 18:2	C23 H44 N O7 P	477.285	5.693	478.292	No results	No results	Full match					20413905.467406623	14615500.340185065	10769289.30670032	16320854.688003495	36113419.926302895	14605248.343298942	7037916.288377711	3761395.615421899	6634305.930101118	3206810.402918279	5768734.677969379	9255585.045028592	3.16385855856968	1.6616851050536732	0.00068449717619089	1	1.26881
Com_9099_pos	6-(Dimethylamino)purine	C7 H9 N5	163.086	4.717	164.094	No results	No results	Full match	Organoheterocyclic compounds	Imidazopyrimidines	Purines and purine derivatives	Xanthines	403439.5930145536	367862.2331912785	461579.4257496025	413257.7799026915	341229.1796237034	390309.9621805114	28974836.739105884	26234930.489003435	27653204.975324817	23583502.732550688	22562637.60826545	25339931.82250405	0.0154045539019513	-6.0205	6.99083583860381e-15	1	1.50974519325287
Com_910_pos	2-Phenylethylamine	C8 H11 N	121.089	5.419	122.097	No results	No results	Full match	Benzenoids	Benzene and substituted derivatives	Phenethylamines	Phenethylamines	29248242.117201854	35292766.31098689	386110508.79767793	97923888.89961948	30886811.060091883	280140223.23173475	101594585.1296173	143352331.55382332	152162828.2443855	8883059.523802588	169504163.4496096	55101807.16006139	1.36315272787162	0.4469472110052493	0.880681511605601	0.527777777777778	0.337691432079861
Com_9109_pos	Pyridoxamine	C8 H12 N2 O2	168.09	1.517	169.097	Full match	No results	Full match	Organoheterocyclic compounds	Pyridines and derivatives	Pyridoxamines	Pyridoxamine 5'-phosphates	29397111.29511169	24451299.98904896	21773415.46341288	26041579.703945056	26438603.997333977	26032284.046329662	22338082.74063441	20521708.46688587	22006636.87358361	23401162.65339154	24711101.291424487	26361897.713004827	1.10616938527371	0.1455723191923377	0.0955412434223309	0.75	0.801701332643231
Com_913_pos	5,5-dimethyl-3-morpholinocyclohex-2-en-1-one	C12 H19 N O2	209.142	6.278	210.149	Full match	No results	No results					2464295.308460865	2007690.3335248688	121019374.92601503	25490434.522944994	8900122.550681582	88451074.25812478	43562211.2027434	246252062.8101415	224106925.11196965	431356317.77269256	258096244.9387319	34487203.951473564	0.200614607587789	-2.3175	0.0262210907582872	0.888888888888889	1.0090538683426
Com_917_pos	Methyl-3-hydroxybutyric acid	C5 H10 O3	118.066	5.189	119.073	No results	Invalid mass	No results	Lipids and lipid-like molecules	Fatty Acyls	Fatty acids and conjugates	Hydroxy fatty acids	6598368.303628316	5807234.880111593	4953807.147450938	5920727.968995636	6629691.667458292	4962269.949108555	295630561.7888864	397081170.7027279	404676441.9322583	411431400.5350524	352631791.9673664	241763930.4113271	0.0165803757517819	-5.91438	9.26652341896841e-11	1	1.50721040796804
Com_9170_pos	N-(5-acetamidopentyl)acetamide	C9 H18 N2 O2	208.121	2.403	209.129	Invalid mass	No match	No results					25888986.336826514	21730268.68231957	25660382.421170007	25675777.813942958	26723001.94037629	24528359.248809163	20866072.64802981	17973684.32933354	19605675.55743628	20783710.629123416	23707551.618296977	25448198.21365309	1.16997236153223	0.22647444916649193	0.0267275414123135	0.916666666666667	0.983670485462247
Com_919_pos	Adenine	C5 H5 N5	135.055	1.616	136.062	Full match	Full match	Full match	Organoheterocyclic compounds	Imidazopyrimidines	Purines and purine derivatives	6-aminopurines	297090307.79329664	213983623.96990052	166738932.86327037	205336543.7312424	193889367.2900989	165898460.5993059	452583818.66945857	345912032.9410225	364423923.92410654	427666687.7886081	380570738.8358629	406596417.18877727	0.522735924417612	-0.935846	0.00021932514668667	1	1.39067285764105
Com_9202_pos	DL-5-Methoxytryptophan	C12 H14 N2 O3	234.101	3.543	235.108	Full match	No results	No results	Organoheterocyclic compounds	Indoles and derivatives	Tryptamines and derivatives	Serotonins	14798502.582843268	26261160.326111887	25519250.58675712	21661943.442816388	15333232.199964112	17189684.531162728	10481470.253764156	9001851.89241022	8515011.560564429	8070209.649116484	8474426.75113594	9318557.18832652	2.2421156572022	1.1648606999847237	0.000309532585543524	1	1.38951067377037
Com_9235_pos	D-Ribulose 1,5-bisphosphate	C5 H12 O11 P2	309.986	1.885	310.993	No results	No results	Full match					7902530.468660881	23250922.67203614	25278210.36924409	12760397.733404722	5685219.147296991	2774994.989439016	235825.8333460184	243318.0678642709	202356.0706042398	211268.24612558488	176211.80010785494	204521.3960198599	60.9754135506173	5.930155732663255	8.90662261106948e-05	1	1.45409049926958
Com_9244_pos	SPB 17:1;2O	C17 H35 N O2	285.267	6.665	286.274	No results	Full match	No results					17890176.575383496	9237940.756958986	10305686.823201625	27172737.484137382	34422119.45635031	10643165.824359884	12956873.009539671	9668513.475773308	13905185.906499812	13878067.52138332	7105716.22285804	10232584.078554897	1.61884546479845	0.6949652723545843	0.175124519470655	0.694444444444444	0.687072925884857
Com_9251_pos	Phe-Pro	C14 H18 N2 O3	262.132	4.791	280.166	No results	No results	Full match	Organic acids and derivatives	Carboxylic acids and derivatives	Amino acids, peptides, and analogues	Dipeptides	1266694.1326335152	1071282.2266671862	17662902.907180965	768612.2102217027	1829819.119335645	1036208.678344236	30487769.35062377	24544697.13206421	21133445.20703508	16556913.74601918	24047624.985378385	29542963.81060996	0.161540344051773	-2.63003	0.00237210310534325	0.972222222222222	1.30045785012234
Com_9306_pos	4-[4-phenyl-3,6-dihydro-1(2H)-pyridinyl]butanoic acid hydrochloride	C15 H19 N O2	223.157	6.813	224.165	Invalid mass	No results	No results					995843.618737549	875959.1732824402	12185743.00105233	3864358.285261666	861197.6733023432	7860516.138150568	5084545.308469859	17652446.404584724	18443716.720112003	28024909.238045007	23844549.19254549	3090661.690770145	0.277131144908697	-1.85136	0.029371218966909	0.861111111111111	0.990663084660307
Com_9311_pos	SLH	C15 H25 N5 O5	754.329	4.849	378.172	Invalid mass	No results	No results					5764087.157090899	12230369.639016531	24977315.57852545	16282726.55116424	3284430.110685205	23534949.480833195	1408769.8588071065	1328859.7037839426	1430682.0242896774	1409414.997121095	1323847.832968956	1312432.9646707885	10.4789141911038	3.389417329676295	0.00135426273723281	1	1.37947479815132
Com_9345_pos	6-methyl-7-nitro-2,3-dihydro-1,4-benzodioxine	C9 H9 N O4	177.04	3.159	178.047	Invalid mass	No results	No results					7962785.979024016	5254663.688900318	3200776.612289637	4794870.729847981	4744434.958994247	4111132.5899517913	19456438.747549403	3582057.690219464	22261911.39658808	4402556.169134241	5718320.82268785	29539922.91323761	0.353910512327358	-1.49854	0.106498685471485	0.722222222222222	0.831652709091307
Com_9347_pos	1-Phenyl-3-methyl-5-pyrazolone	C10 H10 N2 O	174.08	2.715	175.087	Full match	Full match	No results					6986751.674957295	4432304.860576637	3460856.1591692166	4829234.919029091	8396866.05580626	3696771.83307047	23825027.178574827	15110008.165490022	14797220.458460836	14344108.71236248	14628997.49691134	29522470.464328017	0.283376991259044	-1.81921	6.44023070379325e-05	1	1.39202549839844
Com_9361_pos	2-Phenylpropionic acid	C9 H10 O2	150.068	5.045	151.076	No results	No results	Full match	Phenylpropanoids and polyketides	Phenylpropanoic acids	Not available	Phenylpropanoic acids	26034277.28297359	25249413.168859523	10944070.758723222	21664555.91075344	33697355.78864114	22565877.23143333	4285002.449322203	5126353.15035641	5136060.602920133	4036648.455551819	3821253.3779209303	11950641.431832869	4.07951203552672	2.028396596797991	0.00010256207634902	0.972222222222222	1.34713
Com_9392_pos	Triethanolamine	C6 H15 N O3	149.105	1.257	150.113	Full match	Invalid mass	No results	Organic nitrogen compounds	Organonitrogen compounds	Amines	1,2-aminoalcohols	20546773.33190725	9800693.503545808	12080434.768648217	19621296.755127057	12678539.130309287	9321556.35256332	7864865.831297881	26544603.243613105	8975722.325197678	11385265.837123198	7676543.397770167	10837502.322942523	1.14689041270204	0.1977275460141733	0.429621573160012	0.722222222222222	0.38316961170391
Com_949_pos	HET0016	C12 H18 N2 O	228.126	5.8	229.133	Invalid mass	No results	No results	Benzenoids	Benzene and substituted derivatives	Toluenes	Toluenes	31803439.965913467	121132694.58312126	54141904.14148746	39043404.18206552	28392564.81678847	48386814.65981003	417899498.85352015	353477600.2792872	312284687.5654214	389121327.9774187	413498245.72793067	227850237.21254003	0.152734495200435	-2.7109	6.55062668427541e-05	1	1.41423791642127
Com_9493_pos	4-morpholinobenzoic acid	C11 H13 N O3	207.09	0.654	208.097	Full match	No results	Full match					1168523.3535349723	19619301.205475837	18307829.41718847	24888293.88770093	30516987.718613468	19602612.525021955	12192517.077963086	10493662.536140218	11239714.192044085	13074943.50377694	13731724.04116384	14839035.309322458	1.50987345973743	0.5944276444781229	0.876561032639699	0.833333333333333	0.153029527518439
Com_95_pos	1-Acetylimidazole	C5 H6 N2 O	110.048	5.645	111.056	No results	Full match	No results	Organoheterocyclic compounds	Azoles	Imidazoles	Carbonylimidazoles	3949806518.0680394	3660045769.280905	2581006548.396211	3621210898.436685	3556659787.0904307	2619208550.4407263	1888067429.240351	1972788499.5592504	1967133854.7153168	2359734219.4788423	1780434146.5284743	2658464266.27179	1.58299958718264	0.6626608792466444	0.000984676970642011	0.944444444444444	1.25597007863058
Com_9511_pos	ethyl 2-{[(1-methyl-3-propyl-1H-pyrazol-4-yl)carbonyl]amino}acetate	C12 H19 N3 O3	253.143	1.574	254.15	Full match	No results	No results					3747781.420304336	6528598.011948376	5304896.209845415	4952776.457793653	3136962.692264393	3848491.303081392	13008783.086977657	9283825.03261338	9859561.933527568	3630807.578489718	5406663.843171371	28601403.00475925	0.394312856333675	-1.34259	0.0521826442108687	0.833333333333333	0.919464218293237
Com_9531_pos	Chenodeoxycholic acid-3-beta-D-glucuronide	C30 H48 O10	568.323	5.096	569.33	No results	No results	Full match					2096329.136503629	1760810.7616696442	2066641.4959135973	1728660.1886515855	1794957.6623115276	2021646.0083847584	26580304.478280835	20735326.289904065	15300912.003533512	25406433.868391816	26645139.354757752	18756529.871835534	0.0859589709152594	-3.54021	1.16758579302226e-07	1	1.49864462612538
Com_9547_pos	6β-Oxycodol N-oxide	C18 H23 N O5	333.154	3.143	334.161	Invalid mass	Invalid mass	No results	Benzenoids	Phenanthrenes and derivatives	Not available	Phenanthrenes and derivatives	15124733.260641476	968966.249358634	2414400.6194575103	2120675.38819068	812454.1343475856	4266713.703678613	28849659.7704772	25505623.669713628	18790649.744095918	17656357.53632156	21957920.112129927	21857752.54292324	0.190969635188542	-2.38858	0.00383321663762038	1	1.26997536060621
Com_9661_pos	HPK	C17 H28 N6 O4	190.111	11.987	208.145	Invalid mass	No results	No match					23078073.79846799	21651517.83074795	21358510.129642826	25769128.85978448	25271076.8255196	22690188.36171843	22166648.39048956	22754256.93443064	20405321.09940345	23533225.890564065	26019269.471017867	25183986.489511333	0.998256406201604	-0.00251767	0.982706634932537	0.527777777777778	0.227660124614276
Com_9704_pos	4-methyl-5-oxo-2-pentyl-2,5-dihydrofuran-3-carboxylic acid	C11 H16 O4	247.142	5.555	248.149	Invalid mass	No results	No results					31090280.287295178	13466069.425712127	8446181.623584593	14700015.693978196	20451685.084855933	7579516.048607444	14267071.755269803	7561166.179802801	8911340.204836695	9859605.783930471	7275493.128023792	11724134.215322778	1.60630298035394	0.6837440391988852	0.155341311389345	0.75	0.76052487204721
Com_9710_pos	UDP	C9 H14 N2 O12 P2	404.002	5.057	405.009	No results	No results	Full match	Nucleosides, nucleotides, and analogues	Pyrimidine nucleotides	Pyrimidine nucleotide sugars	Pyrimidine nucleotide sugars	4462330.324521569	9090922.665923018	23174800.962649237	7520903.168442057	4299705.020568718	10632877.940931687	4465078.565422463	4580080.287665794	4461668.804424283	4505871.949577195	4531907.58629185	3686945.9723157487	2.25612031850357	1.173844008463556	0.0531833024136622	0.75	1.02236816147656
Com_9794_pos	SM 8:1;2O/36:2	C49 H95 N2 O6 P	838.695	11.18	839.702	No results	Full match	No results					1844931.8433938704	1511905.1910997564	1296613.9237029145	1430921.031219374	1690395.3198229629	1223250.8974136594	27569728.466844983	285233.75281244586	1526243.0795373316	1618311.1109302624	18011377.02022086	1569815.5818911048	0.177894268039533	-2.49091	0.395760360110626	0.666666666666667	0.437582560176063
Com_989_pos	Pyrrole-2-carboxylic acid	C5 H5 N O2	111.032	4.881	112.04	Full match	No results	No results	Organoheterocyclic compounds	Pyrroles	Pyrrole carboxylic acids and derivatives	Pyrrole 2-carboxylic acids	382165255.4390312	291201210.2078713	261232016.095868	402305423.0069175	334538410.5485499	309774562.982817	160605569.6624811	166703852.747091	175199854.24004805	200244205.01381448	153086115.20859802	184848815.00282565	1.90375606730528	0.928848634615281	3.37207046947739e-05	1	1.40622358436586
Com_9894_pos	alpha-Farnesene	C15 H24	204.188	7.448	205.195	No results	No results	Full match	Lipids and lipid-like molecules	Prenol lipids	Sesquiterpenoids	Sesquiterpenoids	19593431.99878301	21950111.892072085	18354658.62051534	17346839.44699439	24043171.63680151	16753982.63697254	27216221.531279087	14192117.67234444	17820551.768538155	14214853.759364871	14705902.844904028	24949764.5646551	1.04370300426396	0.061711237546678496	0.606004376493818	0.611111111111111	0.379967264737537
Com_101_neg	Pentadecanoic Acid	C15 H30 O2	288.231	6.374	287.223	Invalid mass	No results	No results	Lipids and lipid-like molecules	Fatty Acyls	Fatty acids and conjugates	Long-chain fatty acids	1384421704.74456	664725769.2320387	708189789.4894918	1067027793.90687	2951787296.101652	1193464519.7629626	106778539.26124448	31637389.759510685	53996089.56549434	67595167.43302925	15822863.84535802	43048785.360953234	24.9926178625167	4.643430119939974	3.85675333549484e-06	1	1.33989451961635
Com_10131_neg	Esculin	C15 H16 O9	340.077	2.128	339.07	Invalid mass	No results	No results	Phenylpropanoids and polyketides	Coumarins and derivatives	Coumarin glycosides	Coumarin glycosides	308598.6562909729	345316.6957671658	309180.216121079	268226.23198833654	218296.0201453648	307814.2158936801	6919032.921804597	4186481.717237352	3923130.996893423	3331068.850806704	4124202.107506626	4677747.787701489	0.0647026637062223	-3.95003	6.0749942056567e-09	1	1.40037122965585
Com_10235_neg	(5-L-Glutamyl)-L-Amino Acid	C8 H14 N2 O5	218.09	1.389	217.083	No results	No results	Full match	Organic acids and derivatives	Carboxylic acids and derivatives	Amino acids, peptides, and analogues	N-acyl-alpha amino acids	6968901.549541898	3243094.415067796	3796224.443190436	4355941.435324532	3333769.8203773266	2652832.24516964	4928783.909299503	2469954.735496376	2412729.6787642115	2874760.70158902	2506669.9193283534	3737960.498856496	1.28629996866023	0.3632271223189104	0.215094457542664	0.75	0.553859042559024
Com_10238_neg	LPE 15:0	C20 H42 N O7 P	439.271	8.457	438.264	No results	Full match	No results	Lipids and lipid-like molecules	Glycerophospholipids	Glycerophosphoethanolamines	1-acyl-sn-glycero-3-phosphoethanolamines	152265.87857552967	147445.54655205234	155583.65677652997	170615.9860030823	143534.77503681023	153681.92238146617	2315221.1315584034	1187431.0674672376	1765527.6450668855	1056637.1654332604	1359913.4155674228	6200362.507150145	0.0664833695986163	-3.91086	0.000213464069994825	1	1.34068646392653
Com_10403_neg	L-Methionine sulfone	C5 H11 N O4 S	181.041	4.945	162.023	No results	No results	Full match					6642358.02149284	4756686.601579057	4383513.382225231	5502138.718210188	4419400.837370379	5012246.274813696	5575214.537395566	2614751.4522636845	3432758.6204672214	2552268.9817875656	3905581.7754142	5494292.45181354	1.30292751040373	0.3817568204446393	0.0903354124790211	0.75	0.747307075263972
Com_10443_neg	1-Methylguanine	C6 H7 N5 O	165.065	4.683	164.057	No results	No results	Full match	Organoheterocyclic compounds	Imidazopyrimidines	Purines and purine derivatives	6-oxopurines	3458647.6097236937	4677318.871529688	4103001.3468286754	6282021.811142235	5968969.3744894415	5575872.197283544	446535.1918484548	432365.4732170919	426389.9893355829	481416.0072619019	410862.0081799305	339392.61063981394	11.8511194641787	3.566951438326303	3.78019198065502e-08	1	1.40072294797364
Com_10509_neg	D-Glucuronic acid	C6 H10 O7	194.043	1.607	193.036	No results	No results	Full match	Nucleosides, nucleotides, and analogues	Pyrimidine nucleotides	Pyrimidine nucleotide sugars	Pyrimidine nucleotide sugars	1548075.500851916	1216860.879530553	1564844.3883053486	1274300.755923888	1054725.8339234618	1739358.3235872083	6197512.481143877	4034567.000893144	4676115.66004443	4544068.091749397	4708573.104489334	4977876.495625017	0.288213337698943	-1.79479	2.84691867134769e-07	1	1.37451702434405
Com_10544_neg	2'-O-Methyluridine	C10 H14 N2 O6	258.086	4.732	257.078	No results	Full match	Full match	Nucleosides, nucleotides, and analogues	Pyrimidine nucleosides	Not available	Pyrimidine nucleosides	5068739.914151074	5247687.338017568	4249441.217328148	6579319.487018363	5891594.842161045	4441886.322053547	5696676.21142947	3138445.4511246085	4050892.593264381	4356578.042692462	3090328.9864922133	3816930.246676099	1.30347257329664	0.3823602270735409	0.0394709832642924	0.861111111111111	0.863514794608477
Com_10745_neg	Nonanoic acid	C9 H18 O2	158.13	6.216	157.123	No results	No results	Full match	Lipids and lipid-like molecules	Fatty Acyls	Fatty acids and conjugates	Medium-chain fatty acids	2651332.580199699	2609004.059779756	2525850.087881421	2465028.546228905	2735854.2032163874	2450570.8691168963	2520997.630926532	4021527.917642213	2399495.7028440232	2898526.827415175	5524746.46698015	3999991.073972687	0.722557171532982	-0.468816	0.0876312401276167	0.722222222222222	0.784206173552319
Com_10764_neg	Nicotinate ribonucleoside	C11 H13 N O6	255.075	4.892	254.068	No results	No results	Full match	Organic oxygen compounds	Organooxygen compounds	Carbohydrates and carbohydrate conjugates	Glycosylamines	2230595.431828108	2877126.9701752444	4554027.756135722	2.27804e+06	3791410.878493997	5108665.811475531	1844425.968600647	1989041.294999956	1017502.2236012348	1338587.9316612417	1766224.2835742035	1388867.9588240096	2.23013901990112	1.1571336460516588	0.00174764860580245	1	1.14784389383825
Com_10768_neg	Adenosine 3'5'-cyclic monophosphate	C10 H12 N5 O6 P	329.053	2.228	328.045	Full match	No results	Full match	Nucleosides, nucleotides, and analogues	Purine nucleotides	Cyclic purine nucleotides	3',5'-cyclic purine nucleotides	435343.09772720217	390477.2929154989	1117460.4440677634	849159.4837617656	229659.3135546604	5103906.361852697	3806639.819377827	1424194.906424567	1641948.1270891377	1426367.6636405785	1100431.9750267973	1359818.2190480095	0.755247082290442	-0.404979	0.156592708532176	0.805555555555556	0.641223991202697
Com_10809_neg	Pyridoxine O-Glucoside	C14 H21 N O8	331.128	4.956	330.12	No results	No results	Full match	Organoheterocyclic compounds	Pyridines and derivatives	Pyridoxines	Pyridoxines	677144.6629879723	1572574.13336459	1789354.7034217482	1096238.6876263728	1401698.7050660492	2163818.781173136	2688754.1269374816	5674784.555995471	3846016.047531957	3544151.979839717	4438997.074527393	1636226.2311999665	0.39859167019408	-1.32702	0.00387061718068064	0.944444444444444	1.08068157195816
Com_11011_neg	Glycoursodeoxycholic acid	C26 H43 N O5	449.316	6.62	430.299	No results	No results	Full match	Lipids and lipid-like molecules	Steroids and steroid derivatives	Bile acids, alcohols and derivatives	Glycinated bile acids and derivatives	1456839.662333871	1227636.025725298	1888057.4463312384	501000.570499095	556916.0262060213	665926.622041247	2847362.802859694	3432250.3182496456	3891370.61640654	3081613.147251165	2789045.623158284	5010102.618594789	0.299090470423987	-1.74135	0.00127056714498734	1	1.22081310293249
Com_11069_neg	Phenobarbital-d5	C12 H7 [2]H5 N2 O3	237.112	3.913	236.104	Invalid mass	No results	No results					2623996.6711977804	4032214.14950231	2028490.8947686043	3652254.785800792	2985509.2165253838	1981162.719774554	3355317.142401888	4231761.477135253	3458971.8378156447	3612852.3194072912	3069063.4062046017	4919356.604796995	0.764047415216781	-0.388266	0.0691516717449576	0.777777777777778	0.781018615566828
Com_11094_neg	8-Oxo-7,8-dihydro-2'-deoxyadenosine	C10 H13 N5 O4	267.097	2.003	266.09	No results	Full match	Full match	Nucleosides, nucleotides, and analogues	Purine nucleosides	Purine 2'-deoxyribonucleosides	Purine 2'-deoxyribonucleosides	1438364.9942274014	1998974.1965310085	340593.26695200946	1561051.9860375463	1300896.926600709	4657389.125371806	259368.30231725407	2165574.721064042	2597816.6170296567	1379110.2967435778	1614241.729880463	2324509.810855113	1.0925136869071	0.12765135378473816	0.946235854132541	0.583333333333333	0.0359630166979577
Com_112_neg	N-Acetylvaline	C7 H13 N O3	159.089	5.505	158.082	Full match	No results	Full match	Organic acids and derivatives	Carboxylic acids and derivatives	Amino acids, peptides, and analogues	N-acyl-alpha amino acids	1438603885.4196155	1702520568.5280228	1514515759.4818244	2483181298.8018064	1379512012.7543488	1438798138.0163903	434891224.8631944	533722498.7350201	523668828.4184562	682856851.8734342	436421376.7601223	523638434.98492455	3.17591673707561	1.6671730898792572	2.46546338222314e-06	1	1.3504970299199
Com_11437_neg	Asp-Glu	C9 H14 N2 O7	262.081	1.44	261.073	No results	Full match	Full match	Organic acids and derivatives	Carboxylic acids and derivatives	Amino acids, peptides, and analogues	Dipeptides	158217.10815240676	592320.6746138772	1149725.173811592	773627.3142509559	222203.16117222208	514681.2524770938	4786905.41989309	4400374.185528674	4258977.946470304	4161049.0504807406	3248228.6138647245	2215870.6091150925	0.147835580991347	-2.75793	0.000556294066232722	1	1.26566235532012
Com_1157_neg	2-Hydroxyestradiol	C18 H24 O3	288.169	5.522	287.162	Invalid mass	No results	No results	Lipids and lipid-like molecules	Steroids and steroid derivatives	Estrane steroids	Estrogens and derivatives	182287932.35356703	159916892.32410398	165974185.59391862	199535014.15262496	154824109.23003238	159301302.87922058	95778507.71551754	95766578.3305978	104252700.01672453	106208770.52266434	77866729.26010916	106318581.90917106	1.74318255291956	0.8017236620630198	5.99070924440316e-06	1	1.33166200094458
Com_1168_neg	Traumatic acid	C12 H20 O4	228.136	5.89	227.129	No results	No results	Full match	Lipids and lipid-like molecules	Fatty Acyls	Fatty acids and conjugates	Medium-chain fatty acids	178601120.24942276	177719775.64533904	77130255.97705969	152524025.21071333	200894324.3763132	49700128.10011527	103270132.84712128	112335437.54541902	97323794.65990922	139069101.13875258	118501521.51694788	156230597.44696566	1.15114135368391	0.2030649991847666	0.869725271570852	0.638888888888889	0.0819712499215482
Com_117_neg	N-Acetyl-L-tyrosine	C11 H13 N O4	223.085	5.136	222.077	Full match	Full match	Full match	Organic acids and derivatives	Carboxylic acids and derivatives	Amino acids, peptides, and analogues	Tyrosine and derivatives	2318704528.3743334	1778463133.8000052	1804427409.306788	2279100582.462454	2372675131.785124	1884770472.192175	776827090.8359851	826962551.7014699	805845383.6278931	898774712.1670775	863761904.3026593	917082924.209496	2.44400060844917	1.2892446443246013	1.41131328632601e-06	1	1.38133226628699
Com_1199_neg	Tetracycline	C22 H24 N2 O8	444.158	4.887	443.15	Invalid mass	No results	No results	Phenylpropanoids and polyketides	Tetracyclines	Not available	Tetracyclines	3730787.2734042713	12560298.121717256	51858173.89533351	18872633.617150545	2962454.2279562154	21372354.137458824	106545325.11728598	106894454.0173664	165425907.30471623	153998532.46432558	166576917.96208245	94899809.32179593	0.140187537615272	-2.83457	0.00261205853615982	1	1.20805894146649
Com_12_neg	2-Hydroxycaproic acid	C6 H12 O3	132.078	5.579	131.071	Invalid mass	Invalid mass	No results	Lipids and lipid-like molecules	Fatty Acyls	Fatty acids and conjugates	Medium-chain fatty acids	14344488592.74579	11849339348.649574	13542048874.022738	12133953930.372986	11125595542.013569	12910293209.177729	10606842919.223589	9641531236.047052	10559775390.01007	9096491920.821993	9234593942.556175	11705995668.568666	1.24752126260543	0.319064404896399	0.00240265963795803	0.972222222222222	1.11273962290356
Com_12084_neg	N1-{3-[2-(2-pyridyl)ethyl]phenyl}-4-chlorobenzene-1-sulfonamide	C19 H17 Cl N2 O2 S	372.071	1.777	371.063	Full match	No results	No results					776348.9298118195	2482663.1826586425	3099715.8566833264	3365015.6853550468	1290822.1201909431	3420644.204583923	2622162.082099078	3246171.2410112727	3261418.22151127	2590336.9471490863	1786373.1302493652	3153927.092264773	0.866438966511433	-0.20683	0.377130264493111	0.555555555555556	0.41559092498351
Com_12126_neg	13-HPODE	C18 H32 O4	312.231	7.14	311.224	No results	No results	Full match	Lipids and lipid-like molecules	Fatty Acyls	Lineolic acids and derivatives	Lineolic acids and derivatives	772758.1422897029	641358.5004961719	749387.349584419	1927836.0957603888	645677.3560409219	667920.6864455729	859598.3025827662	840748.2088934974	1493240.1543557623	4286048.985657339	645452.5603305666	346975.00832743966	0.637971883609617	-0.648435	0.619564957215318	0.611111111111111	0.245797344129379
Com_12224_neg	2-deoxyglucose-6-phosphate	C6 H13 O8 P	244.035	1.381	243.028	No results	No results	Full match	Organic acids and derivatives	Organic phosphoric acids and derivatives	Phosphate esters	Monoalkyl phosphates	534370.1423671826	246339.11351115117	661785.6177556361	3985852.214957908	714336.6228019366	3115849.859063747	1707296.7987874015	450928.9448990232	837734.4713731105	585802.7361752983	468904.4507793809	699633.5563957113	1.9490414715864	0.9627647885001096	0.549022068901041	0.583333333333333	0.360180812976052
Com_12258_neg	L-Asparagine	C4 H8 N2 O3	132.053	1.376	131.046	No results	No results	Full match	Organic acids and derivatives	Carboxylic acids and derivatives	Amino acids, peptides, and analogues	Asparagine and derivatives	3823202.340915519	1308783.2891681888	2122517.737726761	1934180.7020585136	1247537.9640136326	978810.4412759736	1911260.3245295887	1426121.9507622374	1615104.2157395678	1684830.2051947543	1829345.505539429	2219200.645570788	1.06823685071009	0.0952315585054737	0.888842167958421	0.555555555555556	0.0711770595135271
Com_12307_neg	7,8-Dihydrofolate	C19 H21 N7 O6	443.155	4.878	442.148	No results	No results	Full match					3765531.7836496662	861134.3698558153	919158.4093845928	1224530.5645250718	961178.5465059052	948342.7355301213	937038.729017604	965889.161056056	965743.4589672964	1197690.1776668034	883198.4617227733	903272.0870131938	1.48302160348469	0.5685396139848679	0.368324374419703	0.555555555555556	0.434617287161572
Com_1231_neg	acetyl phospahte	C2 H5 O5 P	139.987	1.29	184.985	No results	No results	Full match					15626936.101517707	3328986.867881869	7281653.035448605	35428341.71814838	35964663.9478196	155528156.8306462	70410958.67288642	20410201.92185427	17756343.41344588	7833937.059237367	2328607.1109658065	9881855.391060326	1.96823971249009	0.976905937628548	0.533825919701359	0.583333333333333	0.390700434447275
Com_1232_neg	3-Phosphoglyceric acid	C3 H7 O7 P	185.993	1.309	184.985	Full match	No results	Full match	Organic oxygen compounds	Organooxygen compounds	Carbohydrates and carbohydrate conjugates	Sugar acids and derivatives	15626936.101517707	3.34986e+06	7281653.035448605	35428341.71814838	36218958.03510224	155528156.8306462	70410958.67288642	20587790.7911728	17756343.41344588	7833937.059237367	2328607.1109658065	9881855.391060326	1.96766233026944	0.9764826616103164	0.533067246385486	0.583333333333333	0.390940189097719
Com_12348_neg	N-Acetyl-Asp-Glu	C11 H16 N2 O8	304.092	5.028	303.084	No results	No results	Full match	Organic acids and derivatives	Carboxylic acids and derivatives	Amino acids, peptides, and analogues	Dipeptides	1573771.215949026	3295493.163611831	1419966.949468522	2165208.828357737	1300620.0337278207	1356163.0781170032	1922265.1568907665	1936488.7546797416	1829116.205668452	4007495.497736624	1999555.2538814864	1675648.4559389818	0.831020953507634	-0.267043	0.341203275489823	0.722222222222222	0.445541645292132
Com_12422_neg	Tris(2-carboxyethyl)phosphine	C9 H15 O6 P	250.061	4.955	249.053	No results	No results	Full match					2251416.8494826346	3318702.5746900765	1966290.2545681507	2241872.451458508	2627167.406264704	2154144.3571127625	2997230.989992691	2633334.115551339	1911769.1589473712	2287457.165190841	2160047.9816421526	2690393.938074304	0.991782184046359	-0.0119048	0.906567510505185	0.583333333333333	0.0829342607724765
Com_12460_neg	L-arginine	C6 H14 N4 O2	174.111	1.215	173.104	No results	No results	Full match	Organic acids and derivatives	Carboxylic acids and derivatives	Amino acids, peptides, and analogues	L-alpha-amino acids	382390.4376942852	280909.39994286775	2989474.9687287337	402344.2141414819	239349.6160128892	351889.0333544702	265958.23906358285	229172.67012161887	170367.98422944016	456344.5516229056	940123.3199751507	235482.36204467044	2.0223985006475	1.0160672990522885	0.414686402097459	0.694444444444444	0.402956989384066
Com_12523_neg	Glu-Thr	C9 H16 N2 O6	248.101	1.456	247.094	No results	Full match	No results	Organic acids and derivatives	Carboxylic acids and derivatives	Amino acids, peptides, and analogues	Dipeptides	405314.9407244793	1003532.7080078884	1371293.4984437688	1327790.4268900808	480876.6739110554	295639.13963833166	2644787.4861087045	3168726.529179063	2807865.451575324	2842163.5761264865	2949205.521427719	3117846.3140022787	0.278624166577966	-1.84361	0.00289075912807605	1	1.21836141135461
Com_12614_neg	D-Erythrose 4-phosphate	C4 H9 O7 P	200.008	1.305	199.001	No results	No results	Full match					1913738.624989008	1486666.601395043	1612360.7378674012	2014193.185696772	985275.7174642828	1509959.127407897	3263181.447583093	2574819.4582176986	2380708.509797172	2551068.2365448675	2596882.66922964	2876454.774734185	0.586229546394262	-0.770462	0.00187135380924788	1	1.18725777719232
Com_1267_neg	4-Hydroxymandelic acid	C8 H8 O4	168.042	2.798	167.035	Full match	Full match	Full match	Benzenoids	Phenols	1-hydroxy-2-unsubstituted benzenoids	1-hydroxy-2-unsubstituted benzenoids	99510468.41862293	142334107.7117566	147287527.42065793	143157298.89513594	91913650.01938312	127787291.7830134	14694083.22479854	14345423.312267568	14945010.01466664	15519203.904230172	20396408.977537464	15832153.702209843	7.85513851354143	2.9736367154987753	1.47655937287979e-08	1	1.40018553437251
Com_129_neg	Acetylcarnitine	C9 H17 N O4	203.116	5.538	202.108	No results	No results	Full match	Lipids and lipid-like molecules	Fatty Acyls	Fatty acid esters	Acyl carnitines	499948478.2568748	696807012.6668804	468638250.0854762	642411375.9541249	174571938.2647518	240019173.1850355	1875148919.084963	1780340271.4538307	1787626125.4911618	2174577066.035965	1500715314.026862	1884499895.682076	0.247425165185269	-2.01494	0.000942790316984875	1	1.27057276418752
Com_1298_neg	Uric acid	C5 H4 N4 O3	168.028	1.847	167.021	Full match	Full match	Full match	Organoheterocyclic compounds	Imidazopyrimidines	Purines and purine derivatives	Xanthines	29085310.321202274	32221374.089898366	142515724.94141597	57307051.86585585	47380134.26105465	119736667.69995365	38534857.1809562	1896864.0025936312	2112395.629256465	2348905.699673452	2633053.45623123	2213709.7760893763	8.6097327675793	3.1059684593560055	0.000943144987664974	0.944444444444444	1.20250536854787
Com_13_neg	2-Hydroxyvaleric acid	C5 H10 O3	118.062	5.232	117.055	Invalid mass	Invalid mass	No results	Lipids and lipid-like molecules	Fatty Acyls	Fatty acids and conjugates	Hydroxy fatty acids	12931790851.723522	12133114672.620564	9757415409.889034	12273418575.334091	12432301057.91564	13564314798.33643	10324479907.487123	8228439502.290968	10787689403.18286	7782758420.783284	6938507139.8109865	9490349546.077232	1.36487992497774	0.4487740359371174	0.00472270772548544	0.944444444444444	1.08587500717198
Com_130_neg	Catechol	C6 H6 O2	110.036	5.43	109.029	Invalid mass	Invalid mass	No results	Benzenoids	Phenols	Benzenediols	Catechols	2100193601.3961573	1103651024.911202	1019579268.6984816	1070845697.7709455	1084617007.2030845	1160730707.4813788	1696388713.7392223	908668090.9762676	786338271.8751582	919034072.2966324	763146717.3828572	1005499826.8848944	1.2402571851426	0.310639315174208	0.207252720976176	0.861111111111111	0.565087158168501
Com_13014_neg	LNAPE 14:0/N-4:0	C23 H46 N O8 P	495.298	8.099	494.29	No results	Full match	No results					154773.49775756162	143047.0625815547	147223.51669019228	166841.7388025702	147327.19695768808	150758.4460761519	2832612.913829402	2746063.000782148	2052448.8790830495	2210420.560371892	2193753.768293616	1083510.9837556418	0.0693638715329454	-3.84967	5.97802343675232e-06	1	1.39390761005389
Com_13191_neg	L-Argininosuccinate	C10 H18 N4 O6	290.123	1.414	289.116	No results	No results	Full match	Organic acids and derivatives	Carboxylic acids and derivatives	Amino acids, peptides, and analogues	Aspartic acid and derivatives	152007.71129412085	154477.30616013583	136429.41695436675	200979.74291590677	199331.51408866563	240790.37244608824	2669796.157285313	1779237.1889115954	1563183.1227256495	2165489.747748701	1587821.7016580403	2122818.477031169	0.0911830819702841	-3.45509	2.74517013508884e-09	1	1.39824654236781
Com_13232_neg	Terephthalic Acid	C8 H6 O4	166.026	5.17	165.019	No results	No results	Full match	Organic acids and derivatives	Carboxylic acids and derivatives	Dicarboxylic acids and derivatives	Dicarboxylic acids and derivatives	1056470.2380370365	1048438.1777750412	2291331.772597333	2137555.1069202763	1748043.9475358464	1797123.0787297236	737369.2467121042	770071.0416400867	1453163.6571938938	734785.2600209547	531983.9886091362	539282.6279960899	2.11447243048525	1.080297749933275	0.00385888717557572	0.944444444444444	1.07988318386637
Com_13485_neg	Guanosine	C10 H13 N5 O5	283.092	3.584	282.085	Full match	Full match	Full match	Nucleosides, nucleotides, and analogues	Purine nucleosides	Not available	Purine nucleosides	524842.3987129552	214644.09749773017	289775.489366784	196551.48596239457	262428.4678975659	351447.3666993028	2415975.7357049338	371528.1440190949	596328.524127361	474655.1090367673	419444.3667257164	1080095.9437318824	0.343351950902704	-1.54224	0.0297762672111449	0.916666666666667	0.925089996821129
Com_13808_neg	L-lysine	C6 H14 N2 O2	146.105	1.449	145.098	No results	No results	Full match	Organic acids and derivatives	Carboxylic acids and derivatives	Amino acids, peptides, and analogues	L-alpha-amino acids	1648244.0085771256	1681577.6644387825	1532523.328980034	2307310.257001549	1086274.9570763062	1511500.8991451494	1235740.1001076377	881380.9276657598	931556.3940536792	928399.7238328124	797224.0885499475	1099559.8259564613	1.66286383269379	0.733670035167294	0.00255221426670135	0.944444444444444	1.12941842954487
Com_1389_neg	Prolylglycine	C7 H12 N2 O3	172.085	5.313	171.077	Full match	No results	Full match	Organic acids and derivatives	Carboxylic acids and derivatives	Amino acids, peptides, and analogues	Dipeptides	128519759.83238618	128009289.19442004	91239197.5967887	163495662.99098068	137773734.10093826	98393386.76442648	64651512.76239891	91005068.46862502	84049837.13432583	114480893.09022136	65832395.14756499	82007034.50865638	1.48882712666794	0.574176246883146	0.00948853626724065	0.944444444444444	1.00661217296452
Com_14047_neg	N-benzyl-N'-methyl-N-(pyridin-3-ylmethyl)thiourea	C15 H17 N3 S	271.118	3.962	270.11	Invalid mass	No results	No results					244797.03653292096	423872.9012672305	442602.73352622346	406768.917248374	124762.8148770036	297488.2888440107	1954427.7277109795	1198110.5238256524	1579494.7066052116	1378556.8710337218	1077747.1576330124	1077785.9479459652	0.234728264702899	-2.09094	0.000206206561775893	1	1.28438680951367
Com_14051_neg	Taurocholic acid	C26 H45 N O7 S	515.293	6.021	514.285	No results	No results	Full match	Lipids and lipid-like molecules	Steroids and steroid derivatives	Bile acids, alcohols and derivatives	Trihydroxy bile acids, alcohols and derivatives	1805134.265127412	1653146.234113407	1695273.6604487526	1691751.5341487	1764411.130318666	1607764.4047998765	1544078.1097172697	1540519.4265714476	1618469.7508144733	1602444.58551431	1611900.6806676153	1659517.6319832047	1.06688479829098	0.09340440305349924	0.0133739095578571	0.888888888888889	0.987684994203836
Com_14148_neg	NADH	C21 H29 N7 O14 P2	665.127	4.595	664.12	No results	No results	Full match	Nucleosides, nucleotides, and analogues	(5'-&gt;5')-dinucleotides	Not available	(5'-&gt;5')-dinucleotides	231841.2296025981	197404.12737878217	199565.99979602615	253518.39956878888	208327.4365654882	220200.73365797903	1578144.5385478218	1847653.9994079936	1151452.1291910566	1399107.73222772	1237856.2157791671	542512.4468173363	0.168996268154955	-2.56494	0.00012275830269147	1	1.34366266738633
Com_14194_neg	LNAPE 13:0/N-4:0	C22 H44 N O8 P	481.282	7.836	480.275	No results	Full match	No results					194888.23411702176	183578.7551801149	196186.15587723444	211105.85889513357	195648.04201818147	200536.49777152803	1513227.646732905	1808589.4613318143	1379056.1150206742	1578501.52705592	1493058.6885667848	293967.6949188195	0.146526750192471	-2.77076	0.00135572825157384	1	1.26722857063799
Com_1420_neg	Sodium cholate	C24 H39 Na O5	430.269	5.907	429.262	No results	No results	Full match	Lipids and lipid-like molecules	Steroids and steroid derivatives	Bile acids, alcohols and derivatives	Trihydroxy bile acids, alcohols and derivatives	150234691.71347532	131329872.46190152	119547099.0827908	138148471.56739295	125684169.32403418	131044017.37477753	143194467.20783293	126665769.9693965	115597706.52470808	133732465.2167108	135875261.18393636	123742222.89768152	1.0220599055024	0.03147975873970331	0.63946605871675	0.555555555555556	0.237674214746437
Com_14242_neg	LPE 14:0	C19 H40 N O7 P	425.255	8.018	424.248	No results	Full match	Full match	Lipids and lipid-like molecules	Glycerophospholipids	Glycerophosphoethanolamines	1-acyl-sn-glycero-3-phosphoethanolamines	164972.5237340263	151793.47480391472	161871.1060721446	176226.10266280826	158164.77717806632	155233.60019806938	639997.7999769506	299346.1750796747	304288.85085382353	377233.1798103903	336324.6413183756	1651837.799408252	0.268288709556206	-1.89814	0.0101339062236522	1	1.11094889719477
Com_14343_neg	Dl-Glyceraldehyde3-phosphate	C3 H7 O6 P	169.998	1.302	168.99	No results	No results	Full match					392852.77713880845	353628.12874391966	310889.1680533508	416656.4689660101	227186.3033392041	338426.0581735136	1714787.5396814826	682433.3159783063	806893.2809430753	1013657.2706772868	1139251.712536872	1317981.4946908867	0.305563669571361	-1.71046	6.91348030297275e-05	1	1.29385472319107
Com_1437_neg	3-Methyl-2-oxobutanoic acid	C5 H8 O3	116.047	4.974	115.039	No results	No results	Full match	Organic acids and derivatives	Keto acids and derivatives	Short-chain keto acids and derivatives	Short-chain keto acids and derivatives	14978843.470189534	13804103.540689789	11683987.75646978	15327770.25756815	15899405.920793384	10897561.694946531	65891094.91528286	98303467.91544132	96922972.25741532	164555478.89243183	97979796.61578582	45538622.12415487	0.145103506294712	-2.78485	4.72327108359177e-05	1	1.34769370287844
Com_14416_neg	5'-O-Methylthymidine	C11 H16 N2 O5	274.116	1.441	255.098	No results	Invalid mass	No results	Nucleosides, nucleotides, and analogues	Pyrimidine nucleosides	Pyrimidine 2'-deoxyribonucleosides	Pyrimidine 2'-deoxyribonucleosides	1412647.9366162615	898082.1943716367	1221791.2055325666	1040219.2817023894	821429.5722332523	1080547.1387769247	982538.6746385632	1030937.3092661892	1073974.2443675818	1506813.9998260576	1163637.4842198314	1537875.8445797989	0.887460901698038	-0.172245	0.316157	0.638888888888889	0.44837638268917
Com_14498_neg	ADBICA N-pentanoic acid metabolite	C20 H27 N3 O4	409.183	3.379	408.176	Invalid mass	No results	No results	Organic acids and derivatives	Carboxylic acids and derivatives	Amino acids, peptides, and analogues	N-acyl-alpha amino acids and derivatives	148951.20819622304	148379.06821124506	142947.04405057136	165921.0026677021	154523.88509004877	139427.9850911222	1594070.609703231	1200372.3262776942	1462735.7043784847	1341920.0757378656	1101709.6391292948	919213.8020612712	0.118129603133241	-3.08156	3.23821928373148e-07	1	1.40354014757525
Com_14778_neg	Deoxyguanosine	C10 H13 N5 O4	267.098	3.913	266.09	No results	No results	Full match	Nucleosides, nucleotides, and analogues	Purine nucleotides	Purine deoxyribonucleotides	Purine 2'-deoxyribonucleoside monophosphates	1310700.293603617	1188974.8323997338	1245705.8459484694	1140460.9921734214	950972.6894530922	1150979.2177412412	394386.0539276863	358953.57324163424	307672.5725706623	570083.0902811281	256805.44387195	205864.83603842533	3.3374289708796	1.7387371328450751	0.000175751286586551	1	1.32118361814925
Com_1493_neg	Homovanillic acid	C9 H10 O4	182.058	4.925	181.05	No results	No results	Full match	Benzenoids	Phenols	Methoxyphenols	Methoxyphenols	136060398.66893512	100354471.6144538	100134074.18466616	89254042.32162033	136541705.42745128	123881168.05412842	94962677.55091892	89675118.00601971	98305593.07154566	73247170.341539	101839615.90460417	114280904.79938535	1.19904346542116	0.2618839575102439	0.0947939528576955	0.75	0.719586440594405
Com_14984_neg	6-phospho-D-glucono-1,5-lactone	C6 H11 O9 P	258.014	1.425	257.007	No results	No results	Full match					552189.0729110065	499307.8975752746	260503.45140896665	100717.5856858185	92918.01957801744	546184.3373202931	433748.9604773614	789441.5226561608	858651.3461316272	1470680.055566826	1071908.8911016225	640450.0049114242	0.389718295605937	-1.3595	0.0210773384478364	0.916666666666667	0.964075531887025
Com_1506_neg	Thymidine	C10 H14 N2 O5	242.091	5.492	241.083	No results	No results	Full match	Nucleosides, nucleotides, and analogues	Pyrimidine nucleotides	Pyrimidine deoxyribonucleotides	Pyrimidine 2'-deoxyribonucleoside monophosphates	95762300.8258686	102076364.14528908	92309873.55453876	148781303.3493916	80981691.5947852	75289476.54546289	57015346.67689549	68813727.31117888	59387097.1663562	91053824.15821372	51103396.728772245	63725534.23525529	1.52186817714319	0.6058433993025778	0.00917255666291304	0.944444444444444	1.01251194994486
Com_15163_neg	Inositol	C6 H12 O6	180.063	2.149	179.056	No results	No results	Full match	Organic oxygen compounds	Organooxygen compounds	Alcohols and polyols	Cyclohexanols	866451.1765609236	1149716.9489577406	624197.9869055015	964564.6795816182	826424.8535055078	561538.9728962202	891623.4231770452	454877.50796980655	587856.4204304082	602242.9414746868	571649.6575133972	592741.0647486598	1.34906964046869	0.43196482372398204	0.0674032335193891	0.777777777777778	0.772770434708054
Com_15241_neg	Sulfoacetic acid	C2 H4 O5 S	139.977	1.344	138.97	No results	No results	Full match	Organic acids and derivatives	Organic sulfonic acids and derivatives	Organosulfonic acids and derivatives	Organosulfonic acids	459023.5274151318	337311.2184189983	452075.2474285962	689684.6207700379	698430.4284644906	1032685.0034650952	758923.7559619007	394848.3551971838	839388.5278396736	407850.39259737823	291082.0357507733	403108.61317152285	1.18545103831417	0.24543607763219746	0.470908122255384	0.638888888888889	0.400092128086559
Com_15263_neg	LPC 18:0	C26 H54 N O7 P	569.371	10.256	568.364	No results	Invalid mass	No results	Lipids and lipid-like molecules	Glycerophospholipids	Glycerophosphocholines	Phosphocholines	838857.0524338824	708201.1541617269	641007.0539996936	1027725.2424472166	1002142.5228097304	802464.2489706113	1061250.2667568866	867617.5801858802	925044.1169666464	1091404.906431234	822391.4147512084	929257.6923764126	0.881240522530543	-0.182392	0.163688020777357	0.75	0.693813374962758
Com_1530_neg	4-Hydroxybenzoic acid	C7 H6 O3	138.031	5.388	137.024	No results	No results	Full match	Benzenoids	Benzene and substituted derivatives	Benzoic acids and derivatives	Hydroxybenzoic acid derivatives	131286662.60585836	106457638.04107296	94997792.70219356	142599278.74466428	152488151.09055537	120521208.61049113	9530963.97876387	7618943.530107593	5359645.364701335	5679261.309915113	5596909.530631807	6084012.294434557	18.7698943287277	4.23034862295441	5.26422539230979e-10	1	1.40257171657688
Com_1550_neg	19(R)-Hydroxy prostaglandin A2	C20 H30 O5	332.204	5.735	331.196	Invalid mass	No results	No results	Lipids and lipid-like molecules	Fatty Acyls	Eicosanoids	Prostaglandins and related compounds	113907818.26752596	119931097.12061156	62832860.32699236	143991791.1309742	98870808.93660666	104562078.73662208	93447825.72773772	105485226.54771812	102846380.52152148	127246671.8389666	103196719.27440572	115530703.7833082	0.994354221138176	-0.00816822	0.808329267127337	0.527777777777778	0.157258263955091
Com_15573_neg	4-Hydroxy-2-Oxoglutaric Acid	C5 H6 O6	162.016	1.344	142.998	No results	No results	Full match	Organic acids and derivatives	Keto acids and derivatives	Gamma-keto acids and derivatives	Gamma-keto acids and derivatives	470842.2198306445	116258.7668170588	207963.06166851404	438474.1476887797	214483.67849788052	346836.5678460853	621933.3717602491	712624.3482732676	748943.7793346066	779393.6203384693	599665.436259138	937574.5977332796	0.407909843596531	-1.29368	0.00499410851145473	1	1.16049894932043
Com_15776_neg	D-Fructose 1,6-bisphosphate	C6 H14 O12 P2	339.996	6.835	338.989	No results	No results	Full match					424507.4210160102	489024.5057246075	796465.3840715963	876390.1058260855	472302.3691785159	402097.5970126088	430664.2842115468	483843.2406245168	438275.3580701936	397112.692008699	517225.6204345656	469015.9699451729	1.2648442580753	0.33895975493150243	0.229388685836437	0.638888888888889	0.56239423436971
Com_15813_neg	DL-α-Methoxyphenylacetic acid	C9 H10 O3	120.057	5.276	119.049	Invalid mass	No results	No results	Benzenoids	Benzene and substituted derivatives	Benzylethers	Benzylethers	661673.6060680137	491229.6926899013	580532.5110007883	954379.8314903752	976839.6978786896	610331.5313629659	580363.0433108314	593801.5443030815	609830.9532166381	664096.9438418525	533782.648653344	501690.1324357364	1.22718724764763	0.29535539622343676	0.193597875184186	0.694444444444445	0.644353299216118
Com_1605_neg	Dehydrocholic acid	C24 H34 O5	402.241	6.33	447.24	No results	No results	Full match	Lipids and lipid-like molecules	Steroids and steroid derivatives	Bile acids, alcohols and derivatives	Bile acids, alcohols and derivatives	112961232.44139974	104084722.4089003	86932549.12059633	139053979.4280369	140978585.28956056	60348251.60245599	70937173.07664259	60302109.47665384	42946903.98609833	78386087.61359063	44776390.08433877	55030365.16581908	1.82859723912164	0.8707373467604991	0.00550597221536295	0.944444444444444	1.06249303061154
Com_1616_neg	N-[3-(tert-butyl)phenyl]thiomorpholine-4-carbothioamide	C15 H22 N2 S2	294.122	5.103	293.115	Full match	No results	No match					19582292.2521121	44302426.086177655	17568172.941901576	21047560.66208641	16536377.212809596	12814565.23057072	125251489.6474136	117109601.76527524	112530758.25995232	129489475.27782194	113263831.28963748	119011118.20549904	0.183981357712465	-2.44237	0.000124631537567813	1	1.35099230710207
Com_1633_neg	(S)-Leucic acid	C6 H12 O3	132.078	11.97	131.071	No results	No results	Full match	Lipids and lipid-like molecules	Fatty Acyls	Fatty acids and conjugates	Hydroxy fatty acids	95331089.21658725	88038995.1166655	100170629.75364926	93939180.13667478	74585654.07610193	111521878.23860328	81141687.59092927	78082309.60547288	55383931.421854384	83264969.12804112	73316494.08243732	82591643.80482024	1.24198100467424	0.31264310860522215	0.0266609471899407	0.888888888888889	0.899543508097032
Com_1654_neg	Kynurenic acid	C10 H7 N O3	189.042	5.265	188.035	No results	No results	Full match	Organoheterocyclic compounds	Quinolines and derivatives	Quinoline carboxylic acids	Quinoline carboxylic acids	54426781.85550147	118241852.75181882	101851092.54608443	119698737.0557148	51904306.562814966	58158646.45522121	7119759.741348041	11537760.995934552	10189531.489390353	20504393.202115983	13238651.466453742	11537514.364247384	6.80288233573148	2.766146136129585	5.97417549389449e-06	1	1.3351419448623
Com_1658_neg	Sebacic acid	C10 H18 O4	202.12	5.677	201.113	No results	No results	Full match	Lipids and lipid-like molecules	Fatty Acyls	Fatty acids and conjugates	Medium-chain fatty acids	129317260.77455714	64735747.31650913	72678166.10750642	82120751.6584648	111670263.5703614	81017361.83577773	63615780.81697145	44919908.33991953	44027447.07416247	39937015.07651306	46960371.82053063	45304503.30435857	1.90170667391147	0.9272947368777515	0.00101537142103097	1	1.19700986155381
Com_1659_neg	2-Phenylglycine	C8 H9 N O2	151.063	5.26	150.056	No results	No results	Full match	Organic acids and derivatives	Carboxylic acids and derivatives	Amino acids, peptides, and analogues	Alpha amino acids	121620888.72781284	85656213.36152671	88349641.72927625	96676469.611832	101518550.74929889	109878663.44054475	113154964.3103416	73566090.98362017	69982944.26000907	73663716.63914959	82415621.4061986	86861337.70724532	1.20825950411636	0.27293034298629854	0.057164105721976	0.833333333333333	0.813899208568155
Com_1665_neg	alpha-Ketoglutaric acid	C5 H6 O5	146.021	1.731	145.014	No results	No results	Full match	Organic acids and derivatives	Keto acids and derivatives	Gamma-keto acids and derivatives	Gamma-keto acids and derivatives	23605164.767869413	54514359.07870809	74203076.20942444	46088150.2935085	15000318.895110888	27685528.19894597	124264270.40474594	76096418.45782243	80429459.40927297	92564038.34548818	97302909.6813364	53319357.6733907	0.460128686348232	-1.11989	0.0129520443911204	0.944444444444444	1.02804435609883
Com_1668_neg	L-Tyrosine	C9 H11 N O3	135.068	5.136	180.066	Invalid mass	Invalid mass	No results	Organic acids and derivatives	Carboxylic acids and derivatives	Amino acids, peptides, and analogues	Tyrosine and derivatives	105877232.55474874	93030551.50949606	107802520.89739826	118701648.5619919	111365745.41945729	93179387.96343888	36263303.69477757	57149042.323910125	42663975.0078804	63045251.003551945	38797899.35755582	42958633.52834884	2.24281307756214	1.1653093871154743	7.28059124352414e-05	1	1.32272347299725
Com_1669_neg	DL-m-Tyrosine	C9 H11 N O3	181.074	5.136	180.066	No results	No results	Full match	Organic acids and derivatives	Carboxylic acids and derivatives	Amino acids, peptides, and analogues	Phenylalanine and derivatives	105877232.55474874	93030551.50949606	107802520.89739826	118701648.5619919	111365745.41945729	93179387.96343888	36263303.69477757	57149042.323910125	42663975.0078804	63045251.003551945	38797899.35755582	42958633.52834884	2.24281307756214	1.1653093871154743	7.28059124352414e-05	1	1.32272347299725
Com_175_neg	Pyrogallol	C6 H6 O3	126.031	4.806	125.024	Invalid mass	Invalid mass	No results	Benzenoids	Phenols	Benzenetriols and derivatives	5-unsubstituted pyrrogallols	1209451575.278527	1259907095.7037888	1153130619.147992	1355153774.364232	926750613.5229746	1362343753.8499117	908957889.2266833	888199940.47391	844598008.4944674	987309629.4083526	718530368.6257014	869002449.1576961	1.3930030710288	0.47819843852289623	0.00134820287592647	0.972222222222222	1.15985527998305
Com_1753_neg	DL-Tryptophan	C11 H12 N2 O2	204.09	5.135	203.083	Full match	Full match	Full match	Organoheterocyclic compounds	Indoles and derivatives	Indolyl carboxylic acids and derivatives	Indolyl carboxylic acids and derivatives	3962543.02099912	14576956.99031235	8584547.897541692	8678119.880121592	7994670.459684295	6658465.821125752	89847332.95167157	89578677.25711079	85196436.200722	97679040.9694434	67523645.90637077	108321842.03649248	0.0937574796171858	-3.41492	7.36034507055843e-06	1	1.37452579893408
Com_1784_neg	(1E)-1,7-bis(4-hydroxyphenyl)hept-1-en-3-one	C19 H20 O3	592.283	6.825	591.275	Invalid mass	No results	No results					48523162.2629216	72313283.46822208	50558815.50584321	57462522.57708915	54262126.22602558	32244827.308516443	46038217.03466405	113947663.75794517	49271873.610327296	63775700.29726012	56602830.66044589	58673382.63378882	0.812147529000336	-0.300186	0.30073976091368	0.638888888888889	0.480384577160449
Com_1795_neg	L-Threonic acid	C4 H8 O5	136.037	1.329	135.029	Full match	Full match	No results	Organic oxygen compounds	Organooxygen compounds	Carbohydrates and carbohydrate conjugates	Sugar acids and derivatives	15048663.815093651	7173430.914094135	13653891.697262714	30594039.416895676	35004750.41835713	100801106.46930292	39135630.40977937	22799627.19963395	21964991.86288359	12839831.183734523	12316263.809721604	14889487.47533352	1.63197002725474	0.7066145610299767	0.635899783232236	0.583333333333333	0.338959980672302
Com_1869_neg	D-Xylonic Acid	C5 H10 O6	166.047	1.304	165.04	No results	No results	Full match	Organic oxygen compounds	Organooxygen compounds	Carbohydrates and carbohydrate conjugates	Sugar acids and derivatives	10295892.833551005	3770615.330453696	9823766.052177554	25014440.974438805	33196767.82906216	95350932.17038982	41746631.52122249	15834231.027605882	17869750.601264805	8018190.563697029	4133065.420698023	8382361.847126046	1.84876633771295	0.8865628966053737	0.529436670414482	0.611111111111111	0.387735274226456
Com_1881_neg	Methionine sulfoxide	C5 H11 N O3 S	165.046	1.314	164.038	No results	No results	Full match	Organic acids and derivatives	Carboxylic acids and derivatives	Amino acids, peptides, and analogues	Alpha amino acids	10791926.890236609	3411246.220066674	9401841.524888176	24728815.88544276	32806310.77895968	94625116.20787951	41219723.73896012	15896783.40365336	17297038.374183036	8257578.8203763	2810990.5265787765	8603778.070577802	1.86813614693709	0.9015996003117377	0.509061603028726	0.638888888888889	0.400265804767369
Com_1906_neg	THC	C21 H30 O2	314.221	5.651	313.214	Invalid mass	No results	No results	Organoheterocyclic compounds	Benzopyrans	1-benzopyrans	2,2-dimethyl-1-benzopyrans	9458598.571436234	17160531.257322434	65483123.68443779	30556714.16622924	19783894.400527984	93007936.23841918	17667315.436015584	16631973.73329332	16377528.586423771	14842417.212508386	15523831.969739	12246687.649041608	2.52386555587668	1.335635061257075	0.133381011420914	0.805555555555556	0.693558646065108
Com_1910_neg	Gentisic acid	C7 H6 O4	154.026	5.204	153.019	Full match	No results	Full match	Benzenoids	Benzene and substituted derivatives	Benzoic acids and derivatives	Hydroxybenzoic acid derivatives	109265046.24430212	56890667.69125687	51087306.60350879	55755557.6682937	69579556.59350349	58738434.96912883	70312591.85905744	44986563.21684165	41592683.672564976	42184505.536691055	46848482.57594454	48061343.443593234	1.36508655952782	0.44899243469251476	0.0631041403837025	0.861111111111111	0.795730560741146
Com_1911_neg	2-Ketoadipic acid	C6 H8 O5	160.037	2.39	159.029	No results	Full match	Full match	Organic acids and derivatives	Keto acids and derivatives	Medium-chain keto acids and derivatives	Medium-chain keto acids and derivatives	29935064.28105791	38779910.94168428	91352614.17187132	53608845.5125944	17711511.67836942	65958081.68810863	7241971.94324753	12840638.23447342	11417640.92137372	14111524.450019795	11838244.371748067	11012905.18325893	4.34316862479172	2.1187479669359757	0.00148388705220096	1	1.2183425029903
Com_1918_neg	6,8-di(tert-butyl)-4-oxo-4H-chromene-2-carboxylic acid	C18 H22 O4	302.148	5.104	301.141	Invalid mass	No results	No results					72562288.46302883	80853300.96413146	89594909.0237019	94885138.71190707	57106133.6273745	92368560.36187664	46429627.1218471	57336896.42949531	60035975.33825011	55544141.23885936	38435341.68964912	60625901.03669762	1.53064781808267	0.6141423758790604	0.00281809880664071	0.916666666666667	1.10492869083914
Com_1940_neg	Erythronolactone	C4 H6 O4	118.026	2.65	117.019	No results	Invalid mass	No results	Organoheterocyclic compounds	Lactones	Gamma butyrolactones	Gamma butyrolactones	64918664.10440833	78039567.62099357	89506604.2781989	82727013.53770691	56649465.411539	60034602.20520905	94628512.45861642	66882483.71971008	57938365.39572028	72049582.20424324	69439144.63967249	64794071.807382844	1.01443103788414	0.020670792463475852	0.909831103395009	0.5	0.145974189336426
Com_1952_neg	15-Deoxy-Δ12,14-prostaglandin D2	C20 H30 O4	316.2	5.723	315.193	Invalid mass	No results	No results	Lipids and lipid-like molecules	Fatty Acyls	Eicosanoids	Prostaglandins and related compounds	106300413.17183316	22530459.73603101	79066438.47886541	100051228.55444016	67168821.63610053	82518867.96412309	82269619.65657124	64956741.23119606	69473318.75863773	83156321.92911278	52533494.68970386	70933062.64509949	1.08105797791499	0.11244389791755965	0.952194971302558	0.638888888888889	0.298882644238714
Com_1961_neg	Hippuric acid	C9 H9 N O3	179.058	5.715	178.051	No results	No results	Full match	Benzenoids	Benzene and substituted derivatives	Benzoic acids and derivatives	Hippuric acids	105746406.21902514	44770469.04223194	47894092.80632696	46495230.65427826	42451124.29405988	56679525.8028972	78091721.80077516	33508179.710974302	35303442.678483024	43446237.30545741	28212178.296605088	50872261.428029634	1.27688718470148	0.352631065947853	0.253244209894328	0.722222222222222	0.519823869456039
Com_1962_neg	Levodopa	C9 H11 N O4	197.069	5.713	178.051	No results	No results	Full match	None	None	None	None	105746406.21902514	44770469.04223194	47894092.80632696	46527115.71654811	4204488.053633675	56679525.8028972	78091721.80077516	33508179.710974302	35332531.69706979	43446237.30545741	28212178.296605088	50872261.428029634	1.13493122442443	0.18260487444295198	0.781587284595818	0.638888888888889	0.152378010832162
Com_1970_neg	4-Butylresorcinol	C10 H14 O2	166.099	6.124	165.092	No results	No results	Full match	Benzenoids	Phenols	Benzenediols	Resorcinols	85263122.36856373	67373448.637435	62372035.77952519	108571444.59886266	117745989.82893528	66530054.49767223	77901997.50265604	89190750.02991065	70152823.02369183	112545403.70558847	60435570.08223772	59058457.04443546	1.08219119342905	0.11395540622977506	0.632856431341733	0.583333333333333	0.315073728632415
Com_1984_neg	Androsterone glucuronide	C25 H38 O8	466.255	5.23	465.248	Full match	No results	No results	Lipids and lipid-like molecules	Steroids and steroid derivatives	Steroidal glycosides	Steroid glucuronide conjugates	2342341.9900486646	2362152.345525379	2860774.848995396	2792823.936037904	2449379.264106205	3005623.765053321	98190589.88311478	83201371.651565	92022397.00350158	88927199.681889	84943036.39380772	85007028.03295559	0.0297075803506654	-5.07303	2.17935288311426e-12	1	1.41308826475791
Com_2_neg	2-Isopropylmalic acid	C7 H12 O5	176.068	5.366	175.061	Full match	Full match	Full match	Lipids and lipid-like molecules	Fatty Acyls	Fatty acids and conjugates	Hydroxy fatty acids	49128129530.19377	39328907452.44943	40945156867.872986	47661725197.0773	42217182516.28011	45179446595.97703	42098848602.287415	36062578795.14528	38936139411.09606	42104806070.801735	37766545864.37428	37550824335.8185	1.12766859065752	0.1733431378914084	0.0251741935275018	0.888888888888889	0.929631946263313
Com_2044_neg	LPG 15:0	C21 H43 O9 P	470.265	9.327	469.258	No results	Full match	No results	Lipids and lipid-like molecules	Glycerophospholipids	Glycerophosphoglycerols	Phosphatidylglycerols	441015.607872327	411315.5644399061	422533.52352071536	484807.7195415648	432757.6261701415	401589.2072094778	64354454.67641723	41644669.64964832	52727454.6206558	46016359.77853602	31446738.38626148	89199520.61478311	0.0079720509066686	-6.97083	2.70518978516781e-07	1	1.4079438769947
Com_2094_neg	LNAPS 14:0/N-20:5	C40 H68 N O10 P	753.466	5.234	752.459	No results	Invalid mass	No results					1499414.3230417175	6115895.573262303	11128330.6790689	3886803.768847516	1567932.593432247	7255152.613562334	68124448.44405845	87809314.53825589	85409753.80889776	92948828.55238296	70823892.65000154	34218206.6299566	0.0715935887480122	-3.80403	0.000124624662598386	1	1.30795649241176
Com_2168_neg	4-Hydroxy-3-methylbenzoic acid	C8 H8 O3	152.047	5.098	151.04	No results	No results	Full match	Benzenoids	Benzene and substituted derivatives	Benzoic acids and derivatives	Hydroxybenzoic acid derivatives	5441048.145228303	45566179.47774623	77513426.85397728	48216958.46282522	5232468.201620683	45430454.80045509	15454438.521280635	18646912.895064365	41804309.13694266	17500844.062149186	24494288.81773541	12777737.391884554	1.74015222321622	0.7992135141621579	0.711505191468355	0.666666666666667	0.2885006500226
Com_2169_neg	DL-3,4-Dihydroxyphenyl glycol	C8 H10 O4	170.057	5.117	151.04	No results	No results	Full match					44067626.75681048	45566179.47774623	77513426.85397728	48216958.46282522	31935881.51570719	45430454.80045509	15454438.521280635	18646912.895064365	41804309.13694266	17500844.062149186	24494288.81773541	12777737.391884554	2.24008125909686	1.1635510670907991	0.00271730725663868	0.972222222222222	1.12976019239285
Com_2202_neg	4-Acetamidobutanoic acid	C6 H11 N O3	145.073	3.541	144.066	Full match	Full match	Full match	Organic acids and derivatives	Carboxylic acids and derivatives	Amino acids, peptides, and analogues	Gamma amino acids and derivatives	31008064.891752742	20954798.36317013	28006686.104658432	56100800.46564695	45197692.32380808	76821044.97803433	39442421.16291544	28951694.02044222	26063634.925434586	23963554.501420982	21296395.43905717	24726373.420572534	1.56946420555801	0.6502721260510745	0.126387577436039	0.75	0.719327684743786
Com_2255_neg	Ursolic acid	C30 H48 O3	456.358	7.098	455.35	Invalid mass	No results	No results	Lipids and lipid-like molecules	Prenol lipids	Triterpenoids	Triterpenoids	17653631.75441113	53284049.90916909	48386012.09136736	25832616.05640812	35752747.342888325	55873610.94723216	25619308.911483303	55284715.70668908	43535882.75029756	28418684.070001584	50265509.34794505	77537252.71532097	0.843659681488746	-0.245267	0.498684713619477	0.583333333333333	0.35664614079366
Com_228_neg	Acetyl-N-formyl-5-methoxykynurenamine	C13 H16 N2 O4	264.111	5.44	263.104	Full match	No results	Full match	Organic oxygen compounds	Organooxygen compounds	Carbonyl compounds	Alkyl-phenylketones	1112478473.3645818	1019878296.9423132	904647421.1783046	1180232740.653829	1165073822.5079916	930898614.5475916	656903937.0484902	676652211.7427392	638024053.582125	797783859.406229	651725235.790607	733986310.3151532	1.51939698936251	0.6034988677042277	4.69253842814248e-05	1	1.29253051101031
Com_2290_neg	4-Methylvaleric Acid	C6 H12 O2	116.084	5.7	231.16	No results	No results	Full match	Lipids and lipid-like molecules	Fatty Acyls	Fatty acids and conjugates	Hydroxy fatty acids	63233222.28113614	30630040.18496732	40450325.80117948	36805196.4947612	95164261.5672433	53605530.34308347	50640349.10304782	15472427.465322204	16790820.98661626	15510988.948645638	17595714.63040749	17510725.12687295	2.39579177625013	1.2605025256453435	0.00491671610483288	0.916666666666667	1.06994132800796
Com_2296_neg	5-Methyldeoxycytidine	C10 H15 N3 O4	241.107	5.313	240.099	Full match	No results	Full match	Nucleosides, nucleotides, and analogues	Pyrimidine nucleosides	Pyrimidine 2'-deoxyribonucleosides	Pyrimidine 2'-deoxyribonucleosides	56668460.6162829	69975069.32978167	65407844.81829789	87630771.30971201	50468767.17419484	57259657.38785358	26162779.487502705	43269274.28512759	37614861.17345608	59985740.690381125	26459377.69394969	37824211.69275602	1.67480917994891	0.7439967308995177	0.00658343534012733	0.916666666666667	1.06271174431298
Com_2327_neg	Tretinoin	C20 H28 O2	300.205	5.311	299.198	Invalid mass	No results	No results	Lipids and lipid-like molecules	Prenol lipids	Retinoids	Retinoids	2352371.7599050445	2068092.8236067635	4444117.086527854	3172556.6614186848	2004910.57640228	9640166.706545245	60415509.84682742	71445728.64826202	61694127.85512571	90446858.35813858	64377820.12796475	47536344.85248435	0.0598162042067025	-4.06332	2.15763058766921e-05	1	1.36314522559364
Com_2365_neg	1-[(3,5-dimethyl-4-isoxazolyl)sulfonyl]-4-(9H-fluoren-9-yl)piperazine	C22 H23 N3 O3 S	409.149	5.035	408.142	Invalid mass	No results	No results					2336127.276144923	4470158.585900972	2382414.157079257	3706394.311158303	2392202.4831038904	976019.1397086078	73366792.32234794	65438596.956014894	61757246.86774156	75148219.4257903	68405921.64619747	73568494.46850349	0.0389367714294195	-4.68272	1.49879679420833e-05	1	1.38487021695587
Com_2374_neg	5-Methyltetrahydrofolic acid	C20 H25 N7 O6	459.193	6.968	458.186	Invalid mass	No results	No results	Organoheterocyclic compounds	Pteridines and derivatives	Pterins and derivatives	Tetrahydrofolic acids	5347685.79040891	68840819.39085053	46776608.68877159	31798336.370463047	48135017.54143467	37798511.20175937	28177359.3619157	63854455.15391815	43446257.99310932	28869069.787584968	75252400.60471907	49364502.40714959	0.826043872444196	-0.27571	0.411015673300796	0.583333333333333	0.413881755588694
Com_2410_neg	Ethylmalonic acid	C5 H8 O4	132.042	4.651	131.034	Full match	Full match	Full match	Lipids and lipid-like molecules	Fatty Acyls	Fatty acids and conjugates	Branched fatty acids	41323799.1557537	67741954.61220242	49523397.60032506	77535274.24131182	61336164.39826813	68663929.78943017	20976022.128475036	21061937.196040045	14546194.966242922	26189433.650581725	15351225.717943968	14885567.362459362	3.23974237133887	1.6958790926254428	6.48607852310278e-06	1	1.32639492245231
Com_2479_neg	14,15-Leukotriene E4	C23 H37 N O5 S	439.244	5.682	438.237	Invalid mass	No results	No results	Lipids and lipid-like molecules	Fatty Acyls	Eicosanoids	Leukotrienes	26605096.527934123	33223584.787363883	24622700.6951679	43494054.65702493	23367748.7910889	18640286.26692758	59263990.71090685	58853514.17731351	65441290.04973903	83672342.42081799	36307722.10377794	58716098.66739706	0.469154301166361	-1.09187	0.000893982303345277	0.972222222222222	1.1715985693693
Com_2501_neg	α-Estradiol	C18 H24 O2	272.174	5.422	271.167	Invalid mass	No results	No results	Lipids and lipid-like molecules	Steroids and steroid derivatives	Estrane steroids	Estrogens and derivatives	65006482.19412471	44696379.65418602	54514802.57503997	48499130.88993126	48340389.97291702	65411187.851579264	49139956.37454716	36755499.36592683	38559639.04036583	40099173.74121349	39826138.69102143	53662510.52815582	1.26517083280373	0.3393322015192725	0.0269494087282472	0.833333333333333	0.899852448018182
Com_2503_neg	Prostaglandin G2	C20 H32 O6	368.22	5.682	367.213	No results	No results	Full match	Lipids and lipid-like molecules	Fatty Acyls	Eicosanoids	Prostaglandins and related compounds	65150280.31983738	65473856.41927704	55939353.18967269	77881138.42098375	86005238.13085382	53468436.23965858	41854552.26046986	45235586.89129834	41140881.85673149	57329630.32195184	40864713.175506204	45608966.71203182	1.48480635113886	0.5702747866024633	0.00220431504241854	0.944444444444444	1.13549119150445
Com_2617_neg	Medroxyprogesterone	C22 H32 O3	344.232	5.665	343.225	Invalid mass	No results	No results	Lipids and lipid-like molecules	Steroids and steroid derivatives	Pregnane steroids	Gluco/mineralocorticoids, progestogins and derivatives	72740020.34734386	37029525.3789772	41183972.78734812	44445918.87209972	35541291.21497969	38264275.38652925	51762383.15121751	26846543.95486813	37335807.5369833	35252754.325295925	26719545.17799877	44088168.76828169	1.21260673377452	0.2781117390607055	0.243954634462313	0.694444444444444	0.527112837061708
Com_263_neg	Oleoyl-L-alpha-lysophosphatidic acid	C21 H40 Na O7 P	458.239	5.754	457.231	No results	No results	Full match	Lipids and lipid-like molecules	Glycerophospholipids	Glycerophosphates	1-acylglycerol-3-phosphates	3746298.954078954	3769492.057005312	3748549.848074581	4035301.776550222	3604860.8969735694	3531227.5063097253	957735069.7703688	853837682.9102567	866777884.6177547	983025883.096262	910627056.5870996	926600017.6138036	0.00408025977014308	-7.93712	1.39337794044057e-18	1	1.41425130953061
Com_2637_neg	Xanthurenic Acid	C10 H7 N O4	205.038	5.195	204.03	No results	No results	Full match	Organoheterocyclic compounds	Quinolines and derivatives	Quinoline carboxylic acids	Quinoline carboxylic acids	23143518.55202412	46275809.069261655	60298505.544496514	41098582.44429088	21140758.59834698	23219799.5506361	3004892.428468136	3169243.803007124	3028777.20590297	3844746.6769580967	2780832.8733254494	2666562.137624527	11.6342975082495	3.5403121967383453	1.81217751004768e-05	1	1.37608974539485
Com_2670_neg	Octanedioic acid	C8 H14 O4	174.089	5.253	173.082	No results	No results	Full match	Lipids and lipid-like molecules	Fatty Acyls	Fatty acids and conjugates	Medium-chain fatty acids	34287823.1038754	17009785.9598454	19733567.51346693	32081412.50024064	79356959.62275714	29554521.498607125	9231786.862837676	7970163.604356043	7739603.634720262	9466624.890540918	11900949.308905428	5190746.480614496	4.11698224697435	2.041587227561954	0.000931232115801098	1	1.21684732848443
Com_2682_neg	2-Methoxyestradiol	C19 H26 O3	302.185	5.621	301.177	Invalid mass	No results	No results	Lipids and lipid-like molecules	Steroids and steroid derivatives	Estrane steroids	Estrogens and derivatives	70725365.4014386	33635659.85998933	36428982.56950584	44134980.63226521	25496453.484570485	42839558.02235249	52987358.71397104	30146582.895304136	23771484.727597043	39738044.776793785	28745223.16322527	38296174.572312	1.18520792480092	0.24514017791264636	0.416935659560465	0.638888888888889	0.376949119499033
Com_2753_neg	D-ribose 5-phosphate	C5 H11 O8 P	230.019	1.273	229.012	Full match	Full match	Full match	Organic oxygen compounds	Organooxygen compounds	Carbohydrates and carbohydrate conjugates	Pentose phosphates	18191752.02007488	22582692.60357266	36935186.40335653	14536627.25605005	8652601.199225094	17306010.940905627	65922233.70337016	32845724.88518533	40698748.1804696	31677798.56350215	53986951.4857351	44573540.78040711	0.438274675944559	-1.19009	0.00447591612585949	0.944444444444444	1.10280832617527
Com_2778_neg	Citric acid	C6 H8 O7	192.027	2.12	191.02	No results	No results	Full match	Organic acids and derivatives	Carboxylic acids and derivatives	Tricarboxylic acids and derivatives	Tricarboxylic acids and derivatives	10638668.539267788	30269435.996972136	18807577.975309487	23949959.591666576	30713716.14571224	57512177.473084696	16592573.06310012	17411269.131221592	16539067.84371001	16479844.873290442	14501522.722848555	12393259.728479538	1.83023895801565	0.8720320206613018	0.0906532208524316	0.833333333333333	0.768590091207917
Com_28_neg	N-Acetyl-D-alloisoleucine	C8 H15 N O3	173.105	5.544	172.098	Full match	Full match	Full match	Organic acids and derivatives	Carboxylic acids and derivatives	Amino acids, peptides, and analogues	Isoleucine and derivatives	8662416099.65233	6473740698.875327	6710209775.400201	7686275254.156418	7991758963.719475	7275783091.828038	4090923709.3861375	3579634495.3393097	3910973926.004163	4002163701.7482514	4126623541.8887978	4447744328.348457	1.85446087215163	0.8909998282893868	1.59039660812356e-06	1	1.36357256022404
Com_280_neg	Levulinic acid	C5 H8 O3	116.047	5.366	115.039	Invalid mass	No results	No results	Organic acids and derivatives	Keto acids and derivatives	Gamma-keto acids and derivatives	Gamma-keto acids and derivatives	715959780.6937934	678600960.2653712	602553894.9474595	812685823.0471494	752174770.3223763	794423607.5934541	762780323.1613367	563679698.745786	591677373.6198615	787680461.7301329	700925490.9484725	665773539.2551973	1.06970675806966	0.09721536049505951	0.350066323720824	0.694444444444444	0.466879581897636
Com_2815_neg	8-iso Prostaglandin F2α Ethanolamide	C22 H39 N O5	397.284	7.018	396.276	Full match	No results	No results	Lipids and lipid-like molecules	Fatty Acyls	Eicosanoids	Prostaglandins and related compounds	47981865.698623054	49709139.48214653	55632261.93590304	16365845.814036123	30006397.68763544	36011221.020966806	60074317.63848736	39692469.652024485	28421032.943300422	43964742.20889544	28728305.480934657	44810059.85530468	0.959362780588223	-0.0598516	0.718009598290974	0.527777777777778	0.212422095440234
Com_282_neg	2-Methylbutyroylcarnitine	C12 H23 N O4	245.163	6.217	244.156	No results	No results	Full match	Lipids and lipid-like molecules	Fatty Acyls	Fatty acid esters	Acyl carnitines	75478995.82258034	355628880.3646143	208790500.72530225	186629791.2258029	37758988.063272	68945121.13937443	257993192.9374625	885089543.8498662	732272621.9733647	658545042.2147417	799367158.1318289	566490727.8523105	0.239305159107319	-2.06308	0.00332023716489634	0.972222222222222	1.14098719296244
Com_284_neg	N-Acetyl-L-methionine	C7 H13 N O3 S	191.061	5.218	190.054	Full match	Full match	Full match	Organic acids and derivatives	Carboxylic acids and derivatives	Amino acids, peptides, and analogues	Methionine and derivatives	135836093.5094463	838087712.7076828	306560867.6301447	557245035.3831291	185259863.62882084	102492773.36093669	241695833.8054992	289649612.17404604	269391758.63504183	346995604.2750347	322597981.0641907	349231776.4671272	1.16812820039542	0.22419861661957313	0.748208429229766	0.583333333333333	0.275105208015871
Com_2911_neg	Hypoxanthine	C5 H4 N4 O	136.038	2.01	135.031	Full match	Full match	Full match	Organoheterocyclic compounds	Imidazopyrimidines	Purines and purine derivatives	Hypoxanthines	17264161.16208072	26189780.79530139	18437928.629554447	21043919.489965405	13626913.95744986	17508953.38153788	52082519.62540767	59036854.28447078	54254555.75335292	60902568.22303551	38090358.92532985	56947540.35284175	0.355015705559908	-1.49405	4.93990023498269e-06	1	1.33728976746503
Com_2916_neg	(3beta,9xi)-3-(beta-D-Glucopyranosyloxy)-14-hydroxycard-20(22)-enolide	C29 H44 O9	582.306	5.732	581.298	Invalid mass	No results	No results					51505308.237660654	30394624.925953783	44927684.32353588	42085192.41862399	71371787.74085414	34369237.19805879	46436290.05701817	9753911.47393826	42002196.43576472	43843378.04180703	40581567.57336585	40750723.66683048	1.22960205649653	0.29819148303564885	0.347850067022361	0.638888888888889	0.448853479540323
Com_2987_neg	β-D-Glucopyranuronic acid	C6 H10 O7	194.044	4.992	193.037	Invalid mass	No results	No results	Organic oxygen compounds	Organooxygen compounds	Carbohydrates and carbohydrate conjugates	Glucuronic acid derivatives	43624456.95605959	38762912.12325314	34946711.03372083	45923798.68851078	69553293.39161465	35765941.569762416	1046187.232179265	1304101.876992226	1219325.8536425754	1400227.0532360238	1150334.0208791748	880847.79234294	38.362548151881	5.261626646421386	6.29583332062043e-10	1	1.40572736277706
Com_3003_neg	Hexadecanedioic acid	C16 H30 O4	286.215	6.508	285.207	Full match	No results	No results	Lipids and lipid-like molecules	Fatty Acyls	Fatty acids and conjugates	Long-chain fatty acids	17247233.842318196	38048868.80805254	39457852.67685157	42854540.19548413	60778309.76433424	52458868.81982628	10221220.63558568	5476265.093511649	5123425.161976777	10370833.39662362	5486646.021342816	5289892.951077356	5.97702966671604	2.5794287035327823	2.04501659555744e-05	1	1.31053146970832
Com_3069_neg	Lysope 14:0	C19 H40 N O7 P	425.253	5.805	470.252	No results	No results	Full match	Lipids and lipid-like molecules	Glycerophospholipids	Glycerophosphoethanolamines	1-acyl-sn-glycero-3-phosphoethanolamines	15989424.359494235	50011247.08429514	39879984.44805668	61858609.44237562	31955785.94963513	21649473.267915964	9314356.283832096	31338497.418995567	29297788.33324185	51374582.9866699	24324049.98505876	20168915.15720276	1.33486274534488	0.41669140723847176	0.347735273991844	0.666666666666667	0.443035194495259
Com_3144_neg	Sodium Dehydrocholate	C24 H33 Na O5	424.22	5.543	423.214	No results	No results	Full match	Lipids and lipid-like molecules	Steroids and steroid derivatives	Bile acids, alcohols and derivatives	Bile acids, alcohols and derivatives	58559261.60187127	36229221.60068868	22477426.241959013	33143920.16501588	56685990.40488594	29395594.50789238	13199988.54789092	16026167.759251265	17835168.09624916	11395844.099969031	13830505.726946002	17359161.16746981	2.63803416454096	1.3994632487041851	0.000920003338935865	1	1.22366766210382
Com_3192_neg	diethyl 2-[(2-morpholinoanilino)methylidene]malonate	C18 H24 N2 O5	348.169	5.063	347.162	Full match	No results	No results					1889774.8006308945	1879730.6907227205	2446570.137408596	2994755.42973488	3809919.8126979694	2412820.746270341	21162291.39677212	45608347.50446748	36154800.450471394	61762151.07243713	50173160.01846897	9746375.886922523	0.0687136328649766	-3.86326	9.42022546555128e-05	1	1.32528699244527
Com_3205_neg	LPG 14:0	C20 H41 O9 P	456.25	8.619	455.243	No results	Full match	No results	Lipids and lipid-like molecules	Glycerophospholipids	Glycerophosphoglycerols	Phosphatidylglycerols	1446657.625174343	1872590.816709084	396292.75701303314	963487.831607653	1119210.2880796315	1041956.890236203	16520733.658909328	14569866.41595116	10713842.842312396	11672833.91793459	9016572.251400735	50714328.29412641	0.060421396820315	-4.0488	1.17776074677944e-05	1	1.31912903105342
Com_324_neg	Boc-beta-cyano-L-alanine	C9 H14 N2 O4	214.095	5.65	195.077	No results	No results	Full match	Organic acids and derivatives	Carboxylic acids and derivatives	Amino acids, peptides, and analogues	Alpha amino acids and derivatives	330758586.2800592	522633700.7509926	477052887.3035064	838448412.3986449	331472335.85091174	391334378.7878748	133144431.19395292	235348119.75068396	179026298.19416362	318190758.40938663	174594982.90362054	194119667.04802105	2.34254980311936	1.2280797202215101	0.00135557554192475	1	1.15406688424348
Com_3270_neg	δ-Ribono-1,4-lactone	C5 H8 O5	148.037	2.818	147.029	Full match	Full match	Full match	Organic oxygen compounds	Organooxygen compounds	Carbohydrates and carbohydrate conjugates	Pentoses	12983331.07195617	14616183.799011571	25837176.01946325	21994860.732990928	18453591.466734648	47206514.257875495	30356597.388237	14232923.692732053	17371480.04271973	24848189.93745096	21665129.113711927	15665218.484310957	1.13655696542753	0.18466999535699052	0.775798149514425	0.527777777777778	0.158883229415617
Com_3275_neg	Monobutyl phthalate	C12 H14 O4	222.089	6.112	221.082	No results	No results	Full match	Benzenoids	Benzene and substituted derivatives	Benzoic acids and derivatives	Benzoic acid esters	8995618.113414742	3997662.160703101	8816488.521635346	10176175.013204755	7927698.309876801	47155089.04798835	5961991.6073654	2017257.287792541	3106055.3037592736	2604316.876029194	3353303.88534934	40184003.69364039	1.52146433881411	0.6054605193149004	0.208646905267316	0.833333333333333	0.565887013273366
Com_3358_neg	2-[(3S)-1-(Cyclohexylmethyl)-3-pyrrolidinyl]-5-fluoro-1H-benzimidazole	C18 H24 F N3	301.2	5.226	300.193	Invalid mass	No results	No results	Organoheterocyclic compounds	Benzimidazoles	Not available	Benzimidazoles	24431112.121371597	48835556.44559641	3046049.106092885	14619608.490634467	45324865.378295	3143363.253652397	34385264.70934897	18986466.93618344	16518887.16874854	16280398.64260153	17444906.45949188	43906649.62033452	0.944943892000061	-0.0816994	0.407411453256786	0.444444444444444	0.385089596585164
Com_3374_neg	Asp-Phe methyl ester	C14 H18 N2 O5	294.122	5.444	293.115	No results	No results	Full match					30033525.66907849	15337463.50096584	24659884.116031185	25580989.80504729	17964183.701905828	6817280.641889375	49635369.35094125	44263094.2133341	38424437.09023607	48952912.20188874	48683487.31538671	46318963.33076338	0.435768365953287	-1.19837	0.00778805169750789	1	1.12514247479215
Com_339_neg	D-Proline	C5 H9 N O2	115.063	5.416	229.119	No results	No results	Full match	Organic acids and derivatives	Carboxylic acids and derivatives	Amino acids, peptides, and analogues	Proline and derivatives	764242527.8456521	700632919.6988202	571973014.6166056	682731073.2208686	559517393.7805372	572661768.9567304	411005336.7799141	396310780.93288666	363885284.8226582	438207669.2644973	416875797.97997737	437112647.7121474	1.56359607849268	0.6448678714575069	0.000113469971469377	1	1.29741651707383
Com_3420_neg	Ala-trp	C14 H17 N3 O3	275.127	5.563	320.126	No results	No results	Full match	Organic acids and derivatives	Carboxylic acids and derivatives	Amino acids, peptides, and analogues	Dipeptides	18320921.46441084	26443492.325959105	21746177.12113559	34078622.34620969	14868555.115697457	18643827.3613474	39426021.16122436	43050046.86348724	42079114.32420247	56265449.21542727	36773691.1676462	43729850.51373989	0.51316184824839	-0.962514	0.0011450761168874	1	1.20629354342729
Com_3451_neg	Isoproterenol	C11 H17 N O3	211.121	5.817	210.113	No results	No results	Full match	Benzenoids	Phenols	Benzenediols	Catechols	8387078.117209637	13073509.36372302	5346990.117664778	10992624.017521802	5265001.087443169	2801010.941810264	33114417.33174294	39832101.68889703	33254958.378501173	50806267.32330772	37865338.92705676	45848122.03028736	0.190536656360819	-2.39186	0.000359626091938255	1	1.29728888230422
Com_3460_neg	Porphobilinogen	C10 H14 N2 O4	113.048	4.892	271.094	Invalid mass	No results	No results	Organic nitrogen compounds	Organonitrogen compounds	Amines	Aralkylamines	40693922.133739054	46870156.48380867	35383689.523059614	48613591.66866974	47604685.93662874	40215237.59975232	8986268.872311294	9251196.933108732	10268643.899463044	10497113.361894038	8434450.234178811	10385462.595787348	4.48576991411958	2.165355623038628	1.64829057738145e-09	1	1.4016132893422
Com_347_neg	2-(Formylamino)Benzoic Acid	C8 H7 N O3	165.043	5.148	210.041	No results	No results	Full match					9319408.596060576	224099932.987156	8022324.842776599	102403638.0712416	381503257.7212929	340178121.268353	711141052.3365545	291549868.72058535	313033933.5816404	278698007.5705256	372207120.16208494	403602616.0460912	0.449545198305978	-1.15346	0.0817568532316648	0.805555555555556	0.797754889947706
Com_3483_neg	5-Hydroxytryptophan	C11 H12 N2 O3	220.085	3.898	219.078	Full match	No results	Full match	Organoheterocyclic compounds	Indoles and derivatives	Tryptamines and derivatives	Serotonins	8216316.37091745	8415042.402353307	7190633.834214497	11898232.618442398	5718114.984395698	7166304.565785808	49113440.68836077	26191920.605636302	23944692.87918465	26145440.055244308	19988442.091477465	40425755.40018082	0.26158293642363	-1.93466	2.96698994219067e-05	1	1.30905514329469
Com_3503_neg	Pyridoxine	C8 H11 N O3	169.073	5.815	168.066	No results	No results	Full match	Organoheterocyclic compounds	Pyridines and derivatives	Pyridoxines	Pyridoxines	32204909.797513112	34688384.89578451	24869454.96206053	51936678.96539884	32579329.683144357	19985732.918357	22273413.001699705	28819999.34542296	23339032.42986559	45491954.91141879	18946785.96344247	23456063.57072728	1.20906682126516	0.27389397994178283	0.324324865058142	0.722222222222222	0.442986867395086
Com_3512_neg	N4-Acetylcytidine	C11 H15 N3 O6	285.097	5.523	284.09	No results	No results	Full match	Nucleosides, nucleotides, and analogues	Pyrimidine nucleosides	Not available	Pyrimidine nucleosides	35639968.7525181	39920411.191294536	39146212.50282674	51818290.41513487	25692374.75295861	31831634.28996779	25679774.96048775	31543703.34979645	28003350.81340507	42953580.59147221	22222730.81592176	28499952.35494154	1.25234778387782	0.3246352622709767	0.122488331966124	0.777777777777778	0.669967601495114
Com_352_neg	Capryloylglycine	C10 H19 N O3	201.136	5.72	200.129	Full match	No results	No results	Organic acids and derivatives	Carboxylic acids and derivatives	Amino acids, peptides, and analogues	N-acyl-alpha amino acids	732449981.2276689	392522864.69819605	561987060.173046	509541011.41159743	269951768.1709375	556289061.9675038	448012094.7856916	291323898.05842143	375117852.9674568	307076769.43182576	238340817.305132	414599254.7905135	1.45711470694545	0.543114453673838	0.070456709568108	0.805555555555556	0.770350568295526
Com_3564_neg	N1-(3-amino-4-chlorophenyl)-2-[2,4-di(tert-pentyl)phenoxy]acetamide	C24 H33 Cl N2 O2	416.228	5.617	415.221	Invalid mass	No results	No results					2484723.3118662266	2407939.729031084	2558635.980988852	2689390.321838565	2398863.327077586	2461847.2184627494	44882529.13218569	28373121.2195244	25086211.66719285	36561367.47518975	44740986.25436135	23003673.9855662	0.0740269237886204	-3.75581	2.7981951596889e-06	1	1.39924814040298
Com_3587_neg	aminoimidazole carboxamide ribonucleotide	C9 H15 N4 O8 P	338.061	5.158	337.054	No results	No results	Full match					47678935.81504354	34326916.68091995	31633040.038596503	28491316.06836638	42753202.70946398	30364907.111620367	23194395.88522607	23706455.551951345	20769026.692111176	10117454.991205849	21500390.91766981	43146870.97197095	1.51120813316943	0.5957023712987064	0.0533512623955241	0.861111111111111	0.838278053584914
Com_3589_neg	D-α-Hydroxyglutaric acid	C5 H8 O5	148.037	1.994	147.029	Full match	Full match	Full match	Organic acids and derivatives	Hydroxy acids and derivatives	Short-chain hydroxy acids and derivatives	Short-chain hydroxy acids and derivatives	17671754.840572473	11834907.092636852	13795546.11623668	26449269.617502447	22132549.524065565	41161395.34376084	18613532.07882753	14188341.213257732	13673020.021275882	15259381.706309332	11509972.568344906	13110190.270732883	1.54069004250135	0.6235766482740909	0.121006356411841	0.75	0.735917103077392
Com_36_neg	N-Acetyl-L-phenylalanine	C11 H13 N O3	207.089	5.556	206.082	Full match	Full match	Full match	Organic acids and derivatives	Carboxylic acids and derivatives	Amino acids, peptides, and analogues	Phenylalanine and derivatives	6655794660.703204	4830433516.571228	4536607082.734625	5752109902.070416	5662561690.1323	4950910221.939283	2393846383.219596	1897170324.8965244	1926112573.9879549	2170414054.3576283	1959800591.3019109	2384007712.65727	2.54398888577712	1.3470923677648554	3.09254602391477e-07	1	1.37290843736628
Com_3632_neg	2,3,4-Trihydroxybenzoic acid	C7 H6 O5	170.021	3.182	169.014	No results	No results	Full match	Phenylpropanoids and polyketides	Cinnamic acids and derivatives	Hydroxycinnamic acids and derivatives	Hydroxycinnamic acids	37210188.22482104	25533635.703373484	33887406.317554586	15488265.855223691	22001855.137145422	40516530.95521126	26151015.266594976	19797021.64458892	21759323.563844174	24549966.05713052	17024411.376050413	18025377.900434263	1.37178413856952	0.45605347953084097	0.137486557226346	0.75	0.662535264023221
Com_3660_neg	Gly-Tyr-Ala	C14 H19 N3 O5	309.133	5.461	308.126	No results	No results	Full match	Organic acids and derivatives	Carboxylic acids and derivatives	Amino acids, peptides, and analogues	Oligopeptides	34304513.133879706	29004222.0759784	30321007.657119382	48655958.707852274	29276290.699708227	31249335.65108586	6325021.470574215	5017757.834042819	5172542.857931229	9137312.793525148	4882486.162140365	6147982.908532249	5.52873954662485	2.4669506093741216	1.1364999849724e-07	1	1.37756043561017
Com_3690_neg	mesaconic acid	C5 H6 O4	130.026	5.667	129.019	No results	No results	Full match	Lipids and lipid-like molecules	Fatty Acyls	Fatty acids and conjugates	Methyl-branched fatty acids	5865464.4041905	21559707.857804924	20928628.42108994	23652840.500555377	34050635.57314098	31596247.87311406	38970321.942150414	19057300.07823744	20365572.900540598	15756315.6015647	23076768.57604093	41540028.8219988	0.867019750177698	-0.205863	0.524686760331928	0.5	0.293919299669252
Com_3759_neg	Dodecanedioic acid	C12 H22 O4	230.152	6.306	229.145	Full match	No results	No results	Lipids and lipid-like molecules	Fatty Acyls	Fatty acids and conjugates	Medium-chain fatty acids	21930918.388205573	9703965.870342646	28662177.493937988	46919412.2073253	27154220.08796582	19069884.959683582	25382383.625091784	27237553.82636976	22176507.151934657	34566844.7830323	14906752.608969055	4893952.488679155	1.18795163946696	0.24847610640694334	0.547261435157765	0.555555555555556	0.308279540899009
Com_3768_neg	Methyldopa	C10 H13 N O4	211.085	5.471	210.077	No results	No results	Full match	Phenylpropanoids and polyketides	Phenylpropanoic acids	Not available	Phenylpropanoic acids	23824217.915995423	4640110.45971854	37854051.50898339	32206764.377937797	45571639.16888837	29266712.39441177	19768341.68992469	23264729.41255476	24326592.4547617	24114783.20161755	20571437.71320515	25280534.934671197	1.26241910751685	0.33619094673712807	0.908285623346253	0.75	0.275682818449803
Com_3769_neg	N-Acetyl-L-histidine	C8 H11 N3 O3	197.08	1.453	196.073	No results	No results	Full match	Organic acids and derivatives	Carboxylic acids and derivatives	Amino acids, peptides, and analogues	Histidine and derivatives	27141321.13729593	41311500.20789943	31738252.481332757	24917015.35302491	21139388.501646116	12252564.742228484	3052241.243190989	6815035.915176511	3065467.3447579723	15191014.485426294	2860232.262734462	8567013.420038676	4.00748460729602	2.002696979014796	0.00154612577037686	0.972222222222222	1.17345249619956
Com_3805_neg	Inosine-5'-monophosphate (IMP)	C10 H13 N4 O8 P	348.048	1.683	347.041	Full match	Full match	Full match	Nucleosides, nucleotides, and analogues	Purine nucleotides	Purine ribonucleotides	Purine ribonucleoside monophosphates	34562786.24265855	37186139.65624437	33380176.82808311	46052373.67947428	21783524.75634826	28652922.27650483	433408.4607995517	443799.66084060346	400559.3551691115	483357.9007461333	425650.332818069	401196.3855283783	77.9057563095766	6.28365802513152	2.67293839866241e-08	1	1.41048580978937
Com_3825_neg	Undecanedioic acid	C11 H20 O4	216.136	5.766	215.129	No results	No results	Full match	Lipids and lipid-like molecules	Fatty Acyls	Fatty acids and conjugates	Medium-chain fatty acids	35143331.787593395	16298223.939380882	23580015.78839813	20174729.399677195	32449973.537673004	37601164.383962326	19324798.314422853	7115030.319268175	11589015.451504571	6424759.299877221	8283769.263640168	13436268.374879532	2.49717918313986	1.3202993444349658	0.00175025238776302	0.972222222222222	1.14213137250774
Com_385_neg	1,7-Bis(4-hydroxyphenyl)-3,5-heptanediol	C19 H24 O4	316.164	5.301	315.157	Invalid mass	No results	No results	Phenylpropanoids and polyketides	Diarylheptanoids	Linear diarylheptanoids	Curcuminoids	162550600.29596853	101407173.30191644	296327759.1337094	176648350.5576634	213862500.3661017	557457757.4010185	112991793.87477344	130351018.93948165	129146262.24605116	58188056.32157956	149397756.85543838	82562731.47797586	2.27613720709729	1.1865875269030604	0.0312192188054529	0.888888888888889	0.89647920798161
Com_3905_neg	Methyl nicotinate	C7 H7 N O2	137.048	5.579	319.094	No results	No results	Full match	Organoheterocyclic compounds	Pyridines and derivatives	Pyridinecarboxylic acids and derivatives	Pyridinecarboxylic acids	42854542.53379658	17796547.010466214	18698580.52320789	19356291.5641061	16058437.384348257	24732802.344921757	39979788.50479405	13908114.314630024	10435707.49690141	12235363.701313538	14602810.29939874	15849172.16659792	1.30357867964837	0.3824776617479526	0.223629412558363	0.861111111111111	0.545358927063664
Com_396_neg	Morphine-3-glucuronide	C23 H27 N O9	461.172	5.896	460.165	Invalid mass	No results	No results	Alkaloids and derivatives	Morphinans	Not available	Morphinans	477414952.372936	468066443.0668016	399716180.3816196	384130127.9586541	501019056.7903708	536363474.0613464	328871666.10518897	345072110.696062	449127374.624947	251931344.7242955	334319163.8204184	415199771.9898217	1.30227457017382	0.38103365684943535	0.0223355830817247	0.888888888888889	0.934403964203495
Com_3968_neg	JWH 250 N-pentanoic acid metabolite	C22 H23 N O4	365.159	5.01	364.152	Invalid mass	No results	No results	Organoheterocyclic compounds	Indoles and derivatives	Phenylacetylindoles	Phenylacetylindoles	1519121.200678344	3299680.8345463644	863582.3772840404	2124514.0489402325	1883672.0952379724	1631394.7131139622	40578866.36227962	38692284.14749383	26297850.27834346	34451190.20830178	14617251.00170718	31769118.41458212	0.0607380193311536	-4.04126	3.77865377544293e-07	1	1.36761747676991
Com_3992_neg	2'-O-Methylguanosine	C11 H15 N5 O5	297.108	4.786	296.1	Full match	Full match	Full match	Nucleosides, nucleotides, and analogues	Purine nucleosides	Not available	Purine nucleosides	36734363.85741627	35986863.41478954	30482022.75829138	39203537.56598251	43607185.180716805	35347422.33030673	15062620.79120719	18155325.032251637	17299946.544223264	17038907.5625057	16267163.558641952	17032516.598851606	2.19481579086499	1.1340998605999661	8.83062148556118e-07	1	1.37997220231915
Com_4016_neg	(2S)-4-Oxo-2-phenyl-3,4-dihydro-2H-chromen-7-yl beta-D-glucopyranoside	C21 H22 O8	448.142	6.901	447.135	Invalid mass	No results	No results					21278953.62320719	37720105.99811234	1700711.7259092275	27915480.341973305	22777461.30892621	17702746.877612814	25043245.33958206	35938863.243821785	1409880.3543416583	26758838.844852533	15396884.76788375	18708226.256949484	1.04737719841178	0.06678110251368818	0.912163018945886	0.555555555555556	0.0941606458796844
Com_4029_neg	Phenylacetylglycine	C10 H11 N O3	193.074	5.508	174.056	No results	No results	Full match	Organic acids and derivatives	Carboxylic acids and derivatives	Amino acids, peptides, and analogues	N-acyl-alpha amino acids	25027845.793154016	35582569.74736781	28120299.365159545	42467968.10761829	38380734.525258094	34154995.073029295	6720124.311803531	4610758.883778946	3562672.379843644	4540672.185256626	3938317.485506719	3270792.835322362	7.64673000013317	2.934842934582672	5.01071333673724e-08	1	1.38554763658819
Com_4071_neg	Glycerol-3-phosphate	C3 H9 O6 P	172.013	1.301	171.006	No results	No results	Full match	Lipids and lipid-like molecules	Glycerophospholipids	Glycerophosphates	Glycerophosphates	10487164.141539842	5148878.910134862	10682500.010851162	15529627.630869098	502857.25264150905	34417797.04021974	19061489.03730025	11363021.774710331	10579345.651361872	6654248.365037836	4301837.142275077	6576884.307485386	1.31146202941454	0.39117603805020656	0.795220479380502	0.527777777777778	0.123837049989514
Com_4076_neg	2-{2-oxo-2-[(2-oxo-3-azepanyl)amino]ethoxy}acetic acid	C10 H16 N2 O5	244.106	1.507	243.099	Full match	No results	No results					2879178.8288445994	5455140.141665098	2776859.704690399	3622481.65956893	1890564.5693697876	1607240.3509855152	37811587.93881529	34735777.77358785	33991581.70593618	43577690.28084284	33314325.93717335	29997417.96528504	0.0854219346007738	-3.54925	1.28401965879294e-05	1	1.3764866609649
Com_409_neg	Asp-Phe	C13 H16 N2 O5	280.106	5.014	279.099	No results	No results	Full match	Organic acids and derivatives	Carboxylic acids and derivatives	Amino acids, peptides, and analogues	Peptides	607919154.5132923	494480094.355691	453897605.2717415	596141086.1821467	666152965.0520805	457978969.66244006	261856407.2660564	230533250.36016288	223552606.00738963	271832615.9506277	241821311.79913235	284899019.78995705	2.16347324895067	1.113349282144224	8.42129229213459e-06	1	1.34684642285549
Com_4154_neg	L-beta-Imidazolelactic acid	C6 H8 N2 O3	156.053	5.429	137.035	No results	No results	Full match	Organoheterocyclic compounds	Azoles	Imidazoles	Imidazolyl carboxylic acids and derivatives	32907089.246511307	35882682.76571489	22402462.96115416	39054867.6286403	20368387.89513497	25493046.06172684	20039759.614407822	21929855.62814088	21642393.73922209	27074050.68371565	17415945.372436423	18810643.54898817	1.38763581502502	0.4726289823268536	0.0397341443855043	0.861111111111111	0.869212625943427
Com_4244_neg	2-Deoxyribose 5-phosphate	C5 H11 O7 P	214.024	1.386	213.017	Full match	Full match	Full match	Organic oxygen compounds	Organooxygen compounds	Carbohydrates and carbohydrate conjugates	Pentose phosphates	20247777.203226674	17330524.188314576	14443934.757774586	16449019.935445564	12825039.12029683	11425040.000975132	36708275.41795673	24594285.70028144	22557174.984712683	24156309.840930063	22987387.492593445	26990493.35522665	0.586866451697711	-0.768896	0.000826630030466934	1	1.17699911192178
Com_4245_neg	Gluconolactone	C6 H10 O6	178.048	1.387	213.017	No results	No results	Full match	Organic oxygen compounds	Organooxygen compounds	Carbohydrates and carbohydrate conjugates	Gluconolactones	20247777.203226674	17330524.188314576	14443934.757774586	16449019.935445564	12825039.12029683	11425040.000975132	36708275.41795673	24594285.70028144	22557174.984712683	24156309.840930063	22987387.492593445	26990493.35522665	0.586866451697711	-0.768896	0.000826630030466934	1	1.17699911192178
Com_4427_neg	Phenylacetylglutamine	C13 H16 N2 O4	264.112	4.979	309.11	No results	No results	Full match	Organic acids and derivatives	Carboxylic acids and derivatives	Amino acids, peptides, and analogues	N-acyl-alpha amino acids	21532930.449456155	29238174.259051077	13473939.608122831	1915033.2998849368	10971565.201101985	10510682.112308249	20625303.76826926	20230002.869553234	20864189.47134817	21847641.76178481	16221969.83650624	31820717.914972827	0.665925393605153	-0.586568	0.152358204851255	0.75	0.669621731903875
Com_4442_neg	Ureidosuccinic acid	C5 H8 N2 O5	176.043	1.509	175.036	No results	No results	Full match	Organic acids and derivatives	Carboxylic acids and derivatives	Amino acids, peptides, and analogues	Aspartic acid and derivatives	35542503.08613365	5390270.966976619	6830868.141434861	9246864.127566354	7196560.78095478	16341202.619469931	33399289.11205561	4893464.230715891	6175777.225548318	4578503.977268452	3474022.2460371237	5747669.08401778	1.38235852100906	0.4671318338174897	0.322882184250262	0.805555555555556	0.472495004194262
Com_4596_neg	N-Acetylaspartic acid	C6 H9 N O5	175.048	1.878	174.04	Full match	Full match	Full match	Organic acids and derivatives	Carboxylic acids and derivatives	Amino acids, peptides, and analogues	Aspartic acid and derivatives	7688051.173851021	5242888.833269142	8394882.09063958	12336530.547201574	9981547.902977563	28803925.539623357	14582748.306804664	9098551.280135045	8185848.608292415	8058683.172278676	7896079.818999969	7855916.099314799	1.30119707645284	0.379839486028627	0.62204116101202	0.555555555555556	0.311730469694138
Com_4645_neg	Ouabain	C29 H44 O12	630.288	5.021	629.281	Invalid mass	No results	No results	Lipids and lipid-like molecules	Steroids and steroid derivatives	Steroid lactones	Cardenolide glycosides and derivatives	1048938.591526314	801256.1735022741	756847.7736315299	917378.7343267922	794577.8540156614	827249.6373549603	32106020.90079289	23080022.26753263	12864388.68693714	24216744.944769688	20802396.81847122	17568693.81666787	0.039393118612135	-4.66591	1.63011642082845e-07	1	1.40240832087745
Com_4687_neg	S-(Methyl)Glutathione	C11 H19 N3 O6 S	321.1	1.903	320.093	No results	No results	Full match	Organic acids and derivatives	Carboxylic acids and derivatives	Amino acids, peptides, and analogues	Peptides	351692.9663585906	798005.1219493651	217015.6241579164	237529.1748830992	216925.9556127387	182173.5434451726	31733513.729924478	25266288.259588428	22078427.940274287	18902254.505983837	25853836.225148413	28124591.628285017	0.0131834477901117	-6.24513	1.15742054537046e-06	1	1.39451276794468
Com_4794_neg	2,3-Dinor-8-epi-prostaglandin F2α	C18 H30 O5	326.208	7.236	325.2	Full match	No results	No results	Lipids and lipid-like molecules	Fatty Acyls	Eicosanoids	Prostaglandins and related compounds	6028626.514662889	3355234.059619972	3976428.891074402	2578266.4046308207	7971182.907368517	3707763.010312431	30676083.652382523	3505729.836084453	12731123.50840778	9510835.104870236	2916602.06472708	20012013.616039176	0.348036178361299	-1.52269	0.0971329507445357	0.75	0.753050176386142
Com_4828_neg	Glutathione	C10 H17 N3 O6 S	307.084	5.32	306.077	No results	No results	Full match	Organic acids and derivatives	Carboxylic acids and derivatives	Amino acids, peptides, and analogues	Peptides	16846794.155876108	12368940.41568476	18238073.8376385	32337243.198706385	13631468.229348237	17457983.755784806	6296636.564846452	5909842.390932333	8100930.70780807	16368366.90974253	7998970.736207268	7065448.345172323	2.14302443564392	1.099648300309056	0.00345253121458095	0.944444444444444	1.0888645997689
Com_4880_neg	Syringic acid	C9 H10 O5	198.053	4.673	197.046	No results	No results	Full match	Benzenoids	Benzene and substituted derivatives	Benzoic acids and derivatives	Gallic acid and derivatives	16479302.909036797	20168200.99950188	19646305.118993618	23001492.2888154	34503495.636423536	13644913.557598382	3251801.705677624	2786466.9666043725	2848250.7027903395	3116682.2453894657	2109374.815135255	3079996.0169206294	7.41271911823217	2.890002846014749	1.79041683224658e-06	1	1.37739957551994
Com_509_neg	o-Veratraldehyde	C9 H10 O3	166.063	5.58	165.056	No results	No results	Full match	Benzenoids	Benzene and substituted derivatives	Methoxybenzenes	Dimethoxybenzenes	493199015.9556383	364441878.36980695	359381870.97343373	402541434.37208265	421778490.3941268	400657691.01869744	364766914.34790325	253227531.41943905	279232076.998125	320714383.0682523	348482813.5074867	365382313.85556287	1.26410226447152	0.3381131806653266	0.0130044044906345	0.888888888888889	0.988962661289612
Com_510_neg	4-Methyl-2-Oxopentanoic Acid	C6 H10 O3	130.062	5.598	129.055	No results	No results	Full match					283494744.5366701	169461978.84040228	229886059.82015908	282015207.89543563	171673770.79112917	249902614.51596835	418649048.5653356	418489380.6229706	384353618.6274659	530444327.8951078	438532385.0839571	282391984.3388612	0.56066010960306	-0.834802	0.00102125508267653	0.972222222222222	1.16874208087161
Com_5108_neg	Isoxanthopterin	C6 H5 N5 O2	179.044	2.535	178.037	Full match	Full match	No results	Organoheterocyclic compounds	Pteridines and derivatives	Pterins and derivatives	Pterins and derivatives	7615391.815494634	7235856.3253015615	24142387.36808861	9971380.521820985	9255797.171088869	14118777.31493906	5428242.168963628	6034943.458614854	5878580.60277422	5400538.873969927	6059078.675771303	4290877.0728432685	2.18599722872404	1.128291572048876	0.0120322950976193	1	1.06496682290493
Com_5110_neg	10-Hydroxydecanoic acid	C10 H20 O3	188.141	6.288	187.134	No results	No results	Full match	Organic acids and derivatives	Hydroxy acids and derivatives	Medium-chain hydroxy acids and derivatives	Medium-chain hydroxy acids and derivatives	7732217.144147973	7531236.999872821	4638170.917700468	6789145.398505017	4993514.289871063	4745180.724050618	18045363.62231208	19589423.92597724	19522740.311437026	20609443.495480664	26354927.35303113	23367672.17202432	0.285744670898315	-1.8072	3.41417182673044e-06	1	1.36091041480883
Com_5155_neg	N-Acetyl-DL-serine	C5 H9 N O4	147.053	1.585	146.045	Full match	No results	Full match	Organic acids and derivatives	Carboxylic acids and derivatives	Amino acids, peptides, and analogues	N-acyl-alpha amino acids	6998967.145821802	4673221.952422705	6336699.3263958655	13132283.913321286	9638448.97777982	24247839.637421954	13569165.612506982	7465219.287963988	7566961.044959328	6638471.483564835	4862141.430760818	5801262.8295216365	1.41662085056555	0.5024536818957211	0.401026699040872	0.583333333333333	0.448689080914593
Com_5173_neg	2-Hydroxyphenylalanine	C9 H11 N O3	135.068	2.752	180.066	Invalid mass	No results	No results	Organic acids and derivatives	Carboxylic acids and derivatives	Amino acids, peptides, and analogues	Phenylalanine and derivatives	12297283.2233621	25857649.26968618	13470509.179504864	14272016.472907724	13528310.388106376	13075280.986027775	10152317.73601446	9715475.138275446	9276191.0323873	10696614.012108538	7637002.486273339	8310846.036107781	1.65806820982449	0.7295033578296737	0.00626438123460135	1	1.1060012503577
Com_5214_neg	Docosahexaenoic acid	C22 H32 O2	328.237	6.514	327.229	Invalid mass	No results	No results	Lipids and lipid-like molecules	Fatty Acyls	Fatty acids and conjugates	Very long-chain fatty acids	5488435.832283924	21561194.30911032	14833239.73901291	15210188.747863747	4237036.939985772	12043707.196234245	9844145.84562858	26678162.6549714	19067107.41879344	21083378.6812686	15980018.0721727	22775442.89589145	0.635665872302851	-0.653659	0.099236560037664	0.805555555555556	0.749277788633548
Com_5255_neg	Hydroxykynurenine	C10 H12 N2 O4	224.08	2.681	223.073	Full match	No results	Full match	Organic oxygen compounds	Organooxygen compounds	Carbonyl compounds	Alkyl-phenylketones	10391731.781718768	10464458.55813789	9043363.12013526	7494241.039369502	5315915.779895735	7743108.210546861	26603981.544563144	14532746.14069391	17238408.158858974	12467914.742280094	12549616.265748294	23541813.720498376	0.471810572414296	-1.08372	0.00159314345159662	1	1.14497942367019
Com_532_neg	o-Toluic Acid	C8 H8 O2	136.052	5.138	181.05	No results	No results	Full match					372493576.2339619	335851325.1390821	322728933.5386921	382662284.5082799	531010947.6336646	377972613.14601874	170780981.83382544	198633919.781962	179982923.3366004	194845844.45269617	261021321.96236905	227112806.9102325	1.88474644986775	0.9143704544636586	6.73174067056842e-05	1	1.27386892219319
Com_544_neg	Sulfamethoxazole	C10 H11 N3 O3 S	253.057	2.255	252.049	Invalid mass	No results	No results	Benzenoids	Benzene and substituted derivatives	Benzenesulfonamides	Aminobenzenesulfonamides	118242602.82126266	201891085.5456241	387031372.7118529	205391322.89194044	82404358.75271344	390404431.9908414	303501254.5474471	338338574.3632177	295961144.9090742	349436961.42038006	333265617.2328561	276519335.6264132	0.730283848131227	-0.453471	0.129950849195773	0.666666666666667	0.709927160324884
Com_5513_neg	Dl-Lanthionine	C6 H12 N2 O4 S	208.052	4.956	415.096	No results	No results	Full match	Organic acids and derivatives	Carboxylic acids and derivatives	Amino acids, peptides, and analogues	Cysteine and derivatives	14343902.50367351	15823306.233557297	15523531.31756148	26385069.70364256	13707784.076547535	18184289.68553469	8337754.474029693	10291280.94090366	10921796.599870052	13904264.607657991	9489161.645461714	9679923.891774204	1.66018748564875	0.7313461749108421	0.00261038381601018	0.972222222222222	1.11961343767425
Com_552_neg	Oxaceprol	C7 H11 N O4	173.069	3.889	172.061	No results	No results	Full match	Organic acids and derivatives	Carboxylic acids and derivatives	Amino acids, peptides, and analogues	Proline and derivatives	133536851.73236948	124881436.24472208	366510328.6155196	152355926.82217824	55577398.31949732	390149750.7445341	262277533.4782714	154172642.82994792	209587456.75245053	176974142.57479274	201097796.4165826	163296327.2973498	1.04763192747305	0.0671319328282056	0.649249960197142	0.666666666666667	0.230376818670301
Com_5520_neg	Glycerophospho-N-palmitoyl ethanolamine	C21 H44 N O7 P	453.285	5.02	452.278	Full match	No results	Full match	Lipids and lipid-like molecules	Glycerophospholipids	Glycerophosphoethanolamines	Glycero-3-phospho-N-acyl-ethanolamines	4231226.9874294605	2957197.411744523	19296059.499405675	6446280.070334815	3038542.1405607	21701815.10298229	16995538.291470602	7610315.059557592	8273679.056860615	12010860.76464505	8235119.515566287	4668728.679109979	0.997869681272044	-0.00307668	0.539409076149263	0.638888888888889	0.28319603603324
Com_5545_neg	Adenosine 5'-monophosphate	C10 H14 N5 O7 P	347.064	1.557	346.057	Full match	Full match	Full match	Nucleosides, nucleotides, and analogues	Purine nucleotides	Purine ribonucleotides	Purine ribonucleoside monophosphates	2603136.3157750536	2443561.992199636	2061755.957849546	2786316.026194068	1274392.4518857358	1258788.6184011763	17706277.780756228	19955677.743897542	17708871.057205487	21478756.814403955	20014703.270971224	22595712.61440718	0.104034416851157	-3.26487	6.96107618782015e-06	1	1.38436026987264
Com_556_neg	Tetradecanedioic acid	C14 H26 O4	258.183	6.257	257.176	Full match	No results	Full match	Lipids and lipid-like molecules	Fatty Acyls	Fatty acids and conjugates	Long-chain fatty acids	110915189.24087995	66945985.26150112	114137019.32980412	86765502.72909856	511462524.8995065	278289396.4223027	37980190.52341525	7385182.335505066	20528041.49066323	24423189.780130703	8032953.003575654	21709196.648919724	9.73286479387266	3.28286451370029	0.000425213055620442	1	1.2132437712414
Com_575_neg	Isobutyryl carnitine	C11 H21 N O4	231.147	5.84	230.14	No results	No results	Full match	Lipids and lipid-like molecules	Fatty Acyls	Fatty acid esters	Acyl carnitines	154950386.48672625	194749738.45549908	162708422.62313205	190080458.0580272	57354172.67183025	87493632.21786964	392648983.2542651	363676195.3365555	388286528.75607073	442166474.1472619	291091475.192158	368710285.2540572	0.377167442250571	-1.40672	0.00260456135376315	1	1.19965302099631
[truncated: 75 more rows]
