# Supplementary material for: Cooperative Interactions Between Bacillus and Lysobacter Enhance Consortium Stability and Fusarium Wilt Suppression in Cucumber
Source: Research Square preprint supplement (doi:10.21203/rs.3.rs-6904063/v1), 2025-06-20
Supplement: Supplementary file 2 [file 9177c227ed20b00159aa9cad.pdf]

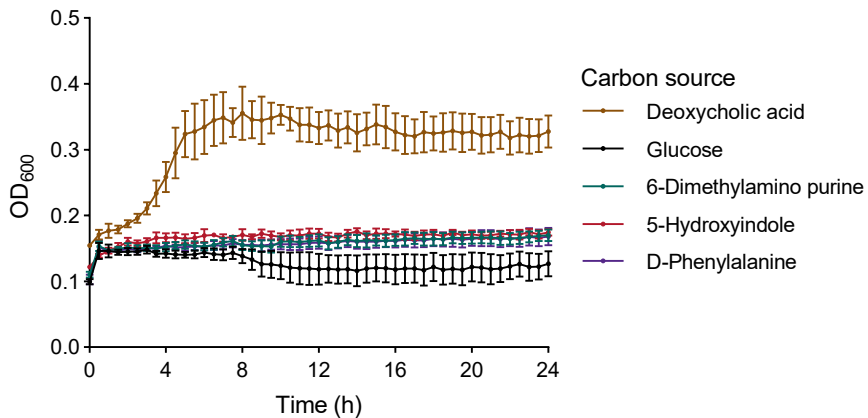

**Figure S3. Growth curves of *L. enzymogenes* XL8 in minimal medium.** The carbon source was added at a final concentration of 0.2%.
